# Supplementary material for: Nonlinear and Emissive {[MIII(CN)6]3–···Polyresorcinol} (M = Fe, Co, Cr) Cocrystals Exhibiting an Ultralow Frequency Raman Response
Source: PubMed Central journal article supplement (PMC10828991; doi:10.1021/acs.inorgchem.3c03153), 2023-12-18
Supplement: ic3c03153_si_001.pdf [file ic3c03153_si_001.pdf]

# Supplementary Information

## Nonlinear and Emissive {[M<sup>III</sup>(CN)<sub>6</sub>]<sup>3-</sup>···Polyresorcinol} (M = Fe, Co, Cr) Cocrystals Exhibiting an Ultralow Frequency Raman Response

Katarzyna Jędrzejowska<sup>1,2</sup>, Jędrzej Kobylarczyk<sup>3</sup>, Dominika Tabor<sup>1</sup>, Monika Srebro-Hooper<sup>1</sup>, Kunal Kumar<sup>4</sup>, Guanping Li<sup>4</sup>, Olaf Stefanczyk<sup>4</sup>, Tadeusz M. Muziol<sup>5</sup>, Katarzyna Dziejcz-Kocurek<sup>6</sup>, Shin-ichi Ohkoshi<sup>4\*</sup>, Robert Podgajny<sup>1\*</sup>

<sup>1</sup> Faculty of Chemistry, Jagiellonian University in Krakow, Gronostajowa 2, 30-387 Kraków, Poland; [katarzyna.jedrzejowska@doctoral.uj.edu.pl](mailto:katarzyna.jedrzejowska@doctoral.uj.edu.pl) (K.J.); [dominika.tabor@student.uj.edu.pl](mailto:dominika.tabor@student.uj.edu.pl) (D.T.); [monika.srebro@uj.edu.pl](mailto:monika.srebro@uj.edu.pl) (M.S.-H.); [robert.podgajny@uj.edu.pl](mailto:robert.podgajny@uj.edu.pl) (R.P.)

<sup>2</sup> Doctoral School of Exact and Natural Sciences, Jagiellonian University in Kraków, Prof. St. Łojasiewicza 11, 30-348 Kraków, Poland; [katarzyna.jedrzejowska@doctoral.uj.edu.pl](mailto:katarzyna.jedrzejowska@doctoral.uj.edu.pl) (K.J.)

<sup>3</sup> Institute of Nuclear Physics PAN, Radzikowskiego 152, 31-342 Kraków, Poland; [jedrzej.kobylarczyk@ifj.edu.pl](mailto:jedrzej.kobylarczyk@ifj.edu.pl) (J.K.)

<sup>4</sup> Department of Chemistry, School of Science, The University of Tokyo, 7-3-1 Hongo, Bunkyo-ku, Tokyo 113-0033, Japan; [kunal-k@chem.s.u-tokyo.ac.jp](mailto:kunal-k@chem.s.u-tokyo.ac.jp) (K.K.); [guanping@chem.s.u-tokyo.ac.jp](mailto:guanping@chem.s.u-tokyo.ac.jp) (G.L.); [olaf@chem.s.u-tokyo.ac.jp](mailto:olaf@chem.s.u-tokyo.ac.jp) (O.S.); [ohkoshi@chem.s.u-tokyo.ac.jp](mailto:ohkoshi@chem.s.u-tokyo.ac.jp) (S.O.)

<sup>5</sup> Faculty of Chemistry, Nicolaus Copernicus University in Toruń, Gagarina 7, 87-100 Toruń, Poland; [tmuziol@umk.pl](mailto:tmuziol@umk.pl) (T.M.)

<sup>6</sup> Marian Smoluchowski Institute of Physics, Jagiellonian University, Łojasiewicza 11, 30-348 Krakow, Poland; [k.dziejcz-kocurek@uj.edu.pl](mailto:k.dziejcz-kocurek@uj.edu.pl) (K.D.-K.)

\* Correspondence: [ohkoshi@chem.s.u-tokyo.ac.jp](mailto:ohkoshi@chem.s.u-tokyo.ac.jp) (S.O.), [robert.podgajny@uj.edu.pl](mailto:robert.podgajny@uj.edu.pl) (R.P.). Tel. +48-12-686-2459 (R.P.)

## Table of contents

|                                                                                                                                                                                                                                                                                         |    |
|-----------------------------------------------------------------------------------------------------------------------------------------------------------------------------------------------------------------------------------------------------------------------------------------|----|
| 1. Details of structural description .....                                                                                                                                                                                                                                              | 6  |
| Figure S1. Experimental room-temperature PXRD patterns of the polycrystalline samples of <b>MDiR</b> and <b>MTriRB</b> (M = Cr, Fe, and Co) in mother liquor ( <i>RT</i> , <i>exp</i> ), compared with the PXRD patterns simulated based on the respective SC XRD data.....             | 6  |
| Figure S2. Asymmetric units of <b>MDiR</b> (M = Cr, Fe, and Co).....                                                                                                                                                                                                                    | 7  |
| Figure S3. Asymmetric units of <b>MTriRB</b> (M = Cr, Fe, and Co).....                                                                                                                                                                                                                  | 8  |
| Figure S4. Crystal structures of <b>CoDiR</b> and <b>CoTriRB</b> : hydrogen-bonded $\{[\text{Co}(\text{CN})_6]^{3-}; \text{L}_n\}_\infty$ subnetworks, organic cations and solvent molecules $\{\text{PPh}_4^+\}\cdot\text{solv}$ subnetwork, and complete projection. ....             | 9  |
| Table S1. Crystal data and structure refinement of <b>MDiR</b> . ....                                                                                                                                                                                                                   | 10 |
| Table S2. Crystal data and structure refinement of <b>MTriRB</b> . ....                                                                                                                                                                                                                 | 11 |
| Table S3. The most important bond lengths and angles for <b>MDiR</b> . ....                                                                                                                                                                                                             | 12 |
| Table S4. The most important bond lengths and angles for <b>MTriRB</b> . ....                                                                                                                                                                                                           | 13 |
| Table S5. Important hydrogen bonding distances and angles in ${}_L\text{O}-\text{H}\cdots\text{N}_{\text{M}-\text{C}\equiv\text{N}}$ subnetworks of <b>MDiR</b> . ....                                                                                                                  | 14 |
| Table S6. Important hydrogen bonding distances and angles in ${}_L\text{O}-\text{H}\cdots\text{N}_{\text{M}-\text{C}\equiv\text{N}}$ subnetworks of <b>CrTriRB</b> and <b>FeTriRB</b> . ....                                                                                            | 14 |
| Table S7. Important hydrogen bonding distances and angles in ${}_L\text{O}-\text{H}\cdots\text{N}_{\text{M}-\text{C}\equiv\text{N}}$ subnetworks of <b>CoTriRB</b> . ....                                                                                                               | 15 |
| Table S8. Distances and angles for $\text{X}-\text{H}\cdots\text{O}$ (X = C, O) hydrogen bonds in <b>MDiR</b> . ....                                                                                                                                                                    | 16 |
| Table S9. Distances and angles for $\text{C}-\text{H}\cdots\text{O}$ hydrogen bonds in <b>MTriRB</b> . ....                                                                                                                                                                             | 17 |
| Figure S5. ESI-MS spectra in the negative ionization mode for <b>FeDiR</b> and for <b>FeTriRB</b> . ....                                                                                                                                                                                | 18 |
| Figure S6. ESI-MS spectra in the positive ionization mode for <b>FeDiR</b> and for <b>FeTriRB</b> . ....                                                                                                                                                                                | 19 |
| Table S10. Interplanar angles formed by twisting the aromatic rings in <b>MDiR</b> and <b>MTriRB</b> and visualization of the degree of rings twist in the described DiR and TriRB molecules .....                                                                                      | 20 |
| Figure S7. Schematic illustration of the interplanar angle $\alpha$ in DiR including the ring designation A and B and visualization of three orthogonal rotation axes $C_2$ producing the $D_2$ symmetry point group .....                                                              | 20 |
| Figure S8. Schematic illustration of the interplanar angles $\alpha$ , $\beta$ , and $\gamma$ in TriRB including the ring designation A, B, C, and D and visualization of the symmetry element for the $C_2$ or $C_1$ symmetry point group.....                                         | 21 |
| Figure S9. Two 3D projections of the <i>dmp</i> topology of hydrogen-bonded $\{[\text{M}(\text{CN})_6]^{3-}; \text{DiR}_2\}_\infty$ (M = Cr, Fe, Co) subnetworks in <b>MDiR</b> architectures along the selected mutually orthogonal directions. ...                                    | 23 |
| Figure S10. The <i>neb</i> topology of hydrogen-bonded $\{[\text{Cr}(\text{CN})_6]^{3-}; \text{TriRB}\}_\infty$ subnetwork in <b>CrTriRB</b> and the <i>dia</i> topology of hydrogen-bonded $\{[\text{Co}(\text{CN})_6]^{3-}; \text{TriRB}\}_\infty$ subnetwork in <b>CoTriRB</b> ..... | 23 |
| 2. Quantum-chemical studies on hydrogen bonding interactions .....                                                                                                                                                                                                                      | 24 |
| 2.1. Computational details.....                                                                                                                                                                                                                                                         | 24 |

|                                                                                                                                                                                                                                                                                                                                                                                                                                                                                                                                                                                                                  |    |
|------------------------------------------------------------------------------------------------------------------------------------------------------------------------------------------------------------------------------------------------------------------------------------------------------------------------------------------------------------------------------------------------------------------------------------------------------------------------------------------------------------------------------------------------------------------------------------------------------------------|----|
| Figure S11. Visualization of the examined molecular clusters $\{[M(CN)_6]^{3-};(H^A H^B DiR)_2(H^A_2 DiR)(H^A DiR)\}$ , $\{[M(CN)_6]^{3-};(H^A H^B DiR)\}$ , $\{[M(CN)_6]^{3-};(H^A_2 DiR)\}$ , $\{[M(CN)_6]^{3-};(H^A DiR)\}$ , $\{[M(CN)_6]^{3-};(H^A_2 DiR)(H^A DiR)\}$ , and $\{(DiR);(H^A DiR)\}$ extracted from the crystal structures of <b>MDiR</b> with M = Cr, Fe, and Co. ....                                                                                                                                                                                                                        | 25 |
| Figure S12. Visualization of the examined molecular clusters $\{[M(CN)_6]^{3-};(H^B H^C TriRB)_2(H TriRB)_2\}$ , $\{[M(CN)_6]^{3-};(H^B H^C TriRB)\}$ , and $\{[M(CN)_6]^{3-};(H TriRB)\}$ extracted from the crystal structures of <b>MTriRB</b> with M = Fe and Co.....                                                                                                                                                                                                                                                                                                                                        | 26 |
| Figure S13. Visualization of the examined molecular clusters $\{[Cr(CN)_6]^{3-};(H^B H^C TriRB)_2(H TriRB)_2\}$ , $\{[Cr(CN)_6]^{3-};(H^B H^C TriRB)\}$ , and $\{[Cr(CN)_6]^{3-};(H TriRB)\}$ extracted from the crystal structure of <b>CrTriRB</b> . ....                                                                                                                                                                                                                                                                                                                                                      | 26 |
| <b>2.2. Calculated data</b> .....                                                                                                                                                                                                                                                                                                                                                                                                                                                                                                                                                                                | 27 |
| Table S11. DFT-computed (B3LYP+D4//TZP, BLYP+D4//TZP in parentheses) interaction energy values (in kcal/mol) between hexacyanometallate anion $[M(CN)_6]^{3-}$ (M = Cr, Fe, and Co) and polyresorcinol DiR molecule(s) in molecular clusters $\{[M(CN)_6]^{3-};(H^A H^B DiR)_2(H^A_2 DiR)(H^A DiR)\}$ , $\{[M(CN)_6]^{3-};(H^A H^B DiR)\}$ , $\{[M(CN)_6]^{3-};(H^A_2 DiR)(H^A DiR)\}$ , $\{[M(CN)_6]^{3-};(H^A_2 DiR)\}$ , and $\{[M(CN)_6]^{3-};(H^A DiR)\}$ , and between the DiR molecules in $\{(DiR);(H^A DiR)\}$ motif, extracted from the crystal structures of <b>MDiR</b> with M = Cr, Fe, and Co..... | 28 |
| Table S12. Hydrogen bond acceptor ( $[Co(CN)_6]^{3-}$ or DiR) / hydrogen bond donor (DiR) energy interaction values and their components (in kcal/mol) according to the ETS energy decomposition scheme for the molecular clusters $\{[Co(CN)_6]^{3-};(H^A H^B DiR)\}$ , $\{[Co(CN)_6]^{3-};(H^A_2 DiR)(H^A DiR)\}$ , $\{[Co(CN)_6]^{3-};(H^A_2 DiR)\}$ , $\{[Co(CN)_6]^{3-};(H^A DiR)\}$ , and $\{(DiR);(H^A DiR)\}$ extracted from the crystal structures of <b>MDiR</b> with M = Cr, Fe, and Co.....                                                                                                          | 29 |
| Figure S14. ETS-NOCV analysis of the interaction between $[Co(CN)_6]^{3-}$ and DiR molecule in the molecular cluster $\{[Co(CN)_6]^{3-};(H^A H^B DiR)\}$ -I extracted from the crystal structure of <b>CoDiR</b> .....                                                                                                                                                                                                                                                                                                                                                                                           | 30 |
| Figure S15. ETS-NOCV analysis of the interaction between $[Co(CN)_6]^{3-}$ and DiR molecules in the molecular cluster $\{[Co(CN)_6]^{3-};(H^A_2 DiR)(H^A DiR)\}$ extracted from the crystal structure of <b>CoDiR</b> .....                                                                                                                                                                                                                                                                                                                                                                                      | 31 |
| Figure S16. ETS-NOCV analysis of the interaction between $[Co(CN)_6]^{3-}$ and DiR molecule in the molecular cluster $\{[Co(CN)_6]^{3-};(H^A_2 DiR)\}$ extracted from the crystal structure of <b>CoDiR</b> .....                                                                                                                                                                                                                                                                                                                                                                                                | 32 |
| Figure S17. ETS-NOCV analysis of the interaction between $[Co(CN)_6]^{3-}$ and DiR molecule in the molecular cluster $\{[Co(CN)_6]^{3-};(H^A DiR)\}$ extracted from the crystal structure of <b>CoDiR</b> .....                                                                                                                                                                                                                                                                                                                                                                                                  | 33 |
| Figure S18. ETS-NOCV analysis of the interaction between two DiR molecules in the molecular cluster $\{(DiR);(H^A DiR)\}$ extracted from the crystal structure of <b>CrDiR</b> . ....                                                                                                                                                                                                                                                                                                                                                                                                                            | 34 |
| Table S13. DFT-computed (B3LYP+D4//TZP, BLYP+D4//TZP in parentheses, values obtained with B3LYP+D3//TZVP using Gaussian 16 indicated by the superscript G16) interaction energy values (in kcal/mol) between hexacyanometallate anion $[M(CN)_6]^{3-}$ (M = Cr, Fe, Co) and polyresorcinol TriRB molecule(s) in molecular clusters $\{[M(CN)_6]^{3-};(H^B H^C TriRB)_2(H TriRB)_2\}$ , $\{[M(CN)_6]^{3-};(H^B H^C TriRB)\}$ , and $\{[M(CN)_6]^{3-};(H TriRB)\}$ extracted from the crystal structures of <b>MTriRB</b> with M = Cr, Fe, and Co.....                                                             | 35 |
| Table S14. Hydrogen bond acceptor ( $[Co(CN)_6]^{3-}$ ) / hydrogen bond donor (TriRB) energy interaction values and their components (in kcal/mol) according to the ETS energy decomposition scheme for the molecular clusters $\{[Co(CN)_6]^{3-};(H^B H^C TriRB)\}$ and $\{[Co(CN)_6]^{3-};(H TriRB)\}$ extracted from the crystal structure of <b>CoTriRB</b> . ....                                                                                                                                                                                                                                           | 36 |
| Figure S19. ETS-NOCV analysis of the interaction between $[Co(CN)_6]^{3-}$ and TriRB molecule in the molecular cluster $\{[Co^{01}(CN)_6]^{3-};(H^B H^C TriRB)\}$ -I extracted from the crystal structure of <b>CoTriRB</b> . ...                                                                                                                                                                                                                                                                                                                                                                                | 37 |

|                                                                                                                                                                                                                                                                                         |    |
|-----------------------------------------------------------------------------------------------------------------------------------------------------------------------------------------------------------------------------------------------------------------------------------------|----|
| Figure S20. ETS-NOCV analysis of the interaction between $[\text{Co}(\text{CN})_6]^{3-}$ and TriRB molecule in the molecular cluster $\{[\text{Co}^{02}(\text{CN})_6]^{3-}; (\text{HTriRB})\}$ -I extracted from the crystal structure of <b>CoTriRB</b> . .....                        | 38 |
| 3. Details of spectroscopic characterization.....                                                                                                                                                                                                                                       | 39 |
| 3.1. <i>Vibrational studies</i> .....                                                                                                                                                                                                                                                   | 39 |
| Figure S21. Room-temperature IR spectra for the single crystals of <b>CrDiR</b> , <b>FeDiR</b> , <b>CoDiR</b> , <b>CrTriRB</b> , <b>FeTriRB</b> , and <b>CoTriRB</b> measured in a wide range. ....                                                                                     | 39 |
| 3.2. <i>Room-temperature Raman scattering spectroscopy</i> .....                                                                                                                                                                                                                        | 39 |
| Figure S22. Infrared spectra of <b>MDiR</b> and <b>MTriRB</b> in the absorption mode, including the regions characteristic of the $\nu(\text{O-H})$ and $\nu(\text{C}\equiv\text{N})$ vibrations, and the skeletal vibrations in the fingerprint region.....                            | 39 |
| Figure S23. Room-temperature Raman scattering spectra for the single crystals of <b>MDiR</b> and <b>MTriRB</b> measured in a wide range.....                                                                                                                                            | 40 |
| 3.3. <i>Low-frequency (LF) Raman scattering spectroscopy</i> .....                                                                                                                                                                                                                      | 41 |
| Figure S24. Room-temperature LF-Raman scattering spectra for the single crystals of <b>CrDiR</b> , <b>CoDiR</b> , <b>CrTriRB</b> , and <b>FeTriRB</b> .....                                                                                                                             | 41 |
| 3.4. $^{57}\text{Fe}$ Mössbauer spectra .....                                                                                                                                                                                                                                           | 41 |
| Figure S25. $^{57}\text{Fe}$ Mössbauer spectra of <b>FeDiR</b> and of <b>FeTriRB</b> . ....                                                                                                                                                                                             | 41 |
| 3.5. <i>UV-Vis electronic absorption spectra</i> .....                                                                                                                                                                                                                                  | 41 |
| Figure S26. Solid-state UV-Vis absorption spectra of the <b>MDiR</b> and <b>MTriRB</b> compounds in the range of 250-800 nm together with those of DiR, TriRB and $\text{PPh}_4[\text{M}(\text{CN})_6]\cdot n\text{H}_2\text{O}$ precursors as the references; M = Cr, Fe, and Co. .... | 42 |
| Figure S27. Molecular models used in calculations of UV-Vis electronic spectra representative of $[\text{Fe}(\text{CN})_6]^{3-}$ references, <b>FeH<sub>3</sub>PG</b> , and <b>FeDiR</b> .....                                                                                          | 43 |
| Figure S28. Simulated UV-Vis spectrum for the pristine $[\text{Fe}(\text{CN})_6]^{3-}$ model.....                                                                                                                                                                                       | 44 |
| Figure S29. Simulated UV-Vis spectrum for the FeDiR- <i>side</i> model. ....                                                                                                                                                                                                            | 44 |
| Figure S30. Simulated UV-Vis spectrum for the FeDiR- <i>frontal</i> model. ....                                                                                                                                                                                                         | 45 |
| Figure S31. Simulated UV-Vis spectrum for the FeH <sub>3</sub> PG- <i>frontal</i> model.....                                                                                                                                                                                            | 45 |
| 4.6. <i>Second-harmonic generation studies</i> .....                                                                                                                                                                                                                                    | 46 |
| Figure S32. Second-harmonic signals for <b>CrDiR</b> , <b>FeDiR</b> , and <b>CoDiR</b> .....                                                                                                                                                                                            | 46 |
| Figure S33. Second-harmonic signals for <b>CrTriRB</b> , and <b>FeTriRB</b> . ....                                                                                                                                                                                                      | 47 |
| Table S15. Room-temperature second-harmonic susceptibilities for powdered samples of <b>MDiR</b> and <b>MTriRB</b> , the KDP standard, and other reference assemblies. ....                                                                                                             | 48 |
| 4.7. <i>Photoluminescence studies</i> .....                                                                                                                                                                                                                                             | 50 |
| Figure S34. Photoluminescence spectra of DiR.....                                                                                                                                                                                                                                       | 50 |
| Figure S35. Photoluminescence spectra of TriRB.....                                                                                                                                                                                                                                     | 50 |
| Figure S36. Photoluminescence spectra of <b>CrDiR</b> . ....                                                                                                                                                                                                                            | 51 |
| Figure S37. Photoluminescence spectra of <b>CrTriRB</b> . ....                                                                                                                                                                                                                          | 51 |
| Figure S38. Photoluminescence spectra of <b>FeDiR</b> .....                                                                                                                                                                                                                             | 52 |

|                                                                                                                                                                                                                       |    |
|-----------------------------------------------------------------------------------------------------------------------------------------------------------------------------------------------------------------------|----|
| Figure S39. Photoluminescence spectra of <b>FeTriRB</b> .....                                                                                                                                                         | 52 |
| Figure S40. Photoluminescence spectra of <b>CoDiR</b> .....                                                                                                                                                           | 52 |
| Figure S41. Photoluminescence spectra of <b>CoTriRB</b> .....                                                                                                                                                         | 52 |
| Figure S42. CIE1931 uniform chromaticity scale diagrams for DiR and TriRB ligands, <b>CrDiR</b> , <b>CrTriRB</b> , <b>FeDiR</b> , <b>FeTriRB</b> , <b>CoDiR</b> , and <b>CoTriRB</b> .....                            | 53 |
| Table S16. Values of the measured quantum yield (QY) for <b>CrDiR</b> , <b>CrTriRB</b> , <b>CoDiR</b> , and <b>CoTriRB</b> together with the corresponding data for the cofomers DiR and TriRB as the references..... | 54 |
| <i>4.8. Details of materials and methods</i> .....                                                                                                                                                                    | 55 |
| <i>4.9. Thermogravimetric analysis</i> .....                                                                                                                                                                          | 57 |
| Figure S43. Thermogravimetric curves of <b>MDiR</b> and <b>MTriRB</b> .....                                                                                                                                           | 57 |
| References to Supplementary Information.....                                                                                                                                                                          | 59 |

## 1. Details of structural description

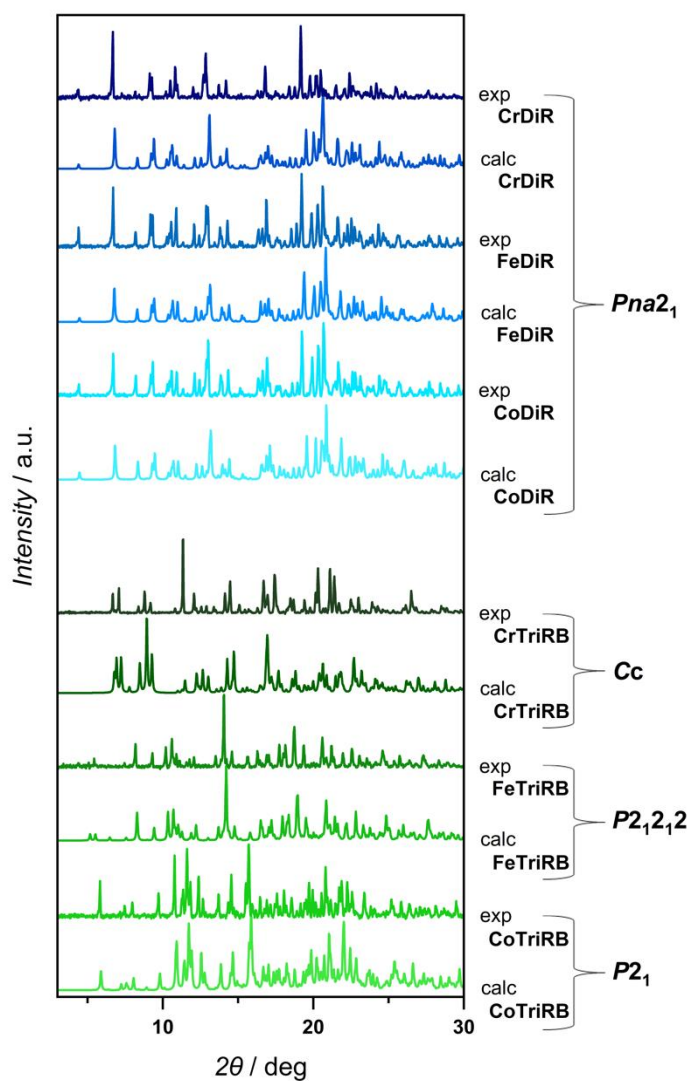

**Figure S1.** Experimental room-temperature PXRD patterns of the polycrystalline samples of MDiR and MTriRB (M = Cr, Fe, and Co) in mother liquor (*RT*, exp), compared with the PXRD patterns simulated based on the respective SC XRD data ( $T = 100$  K, calc).

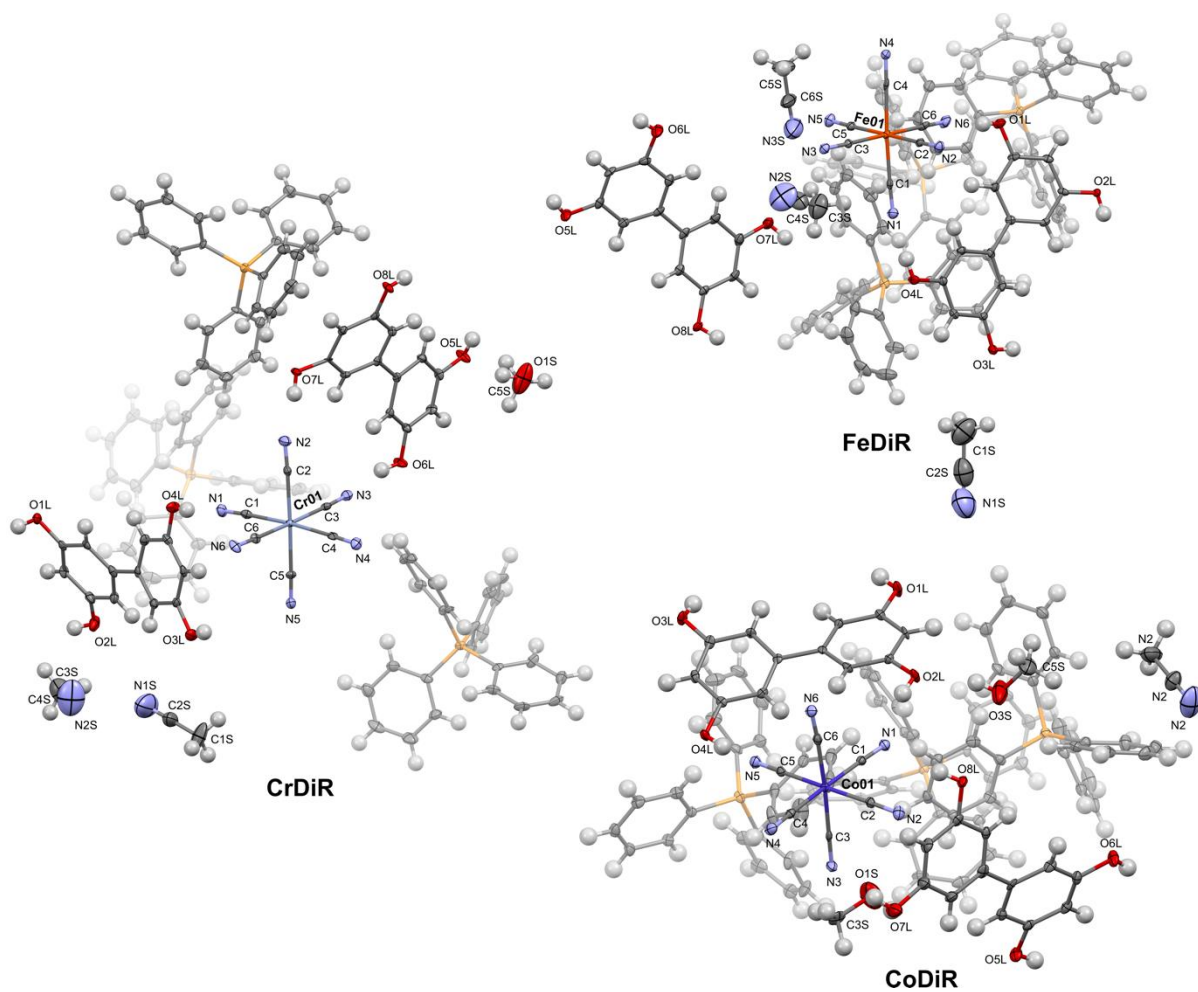

**Figure S2.** Asymmetric units of MDiR (M = Cr, Fe, and Co). Colors: light blue – Cr, dark orange – Fe, dark blue – Co, grey – C, blue – N, red – O, orange – P, light grey – H. The thermal ellipsoids are drawn at the 50% probability level.





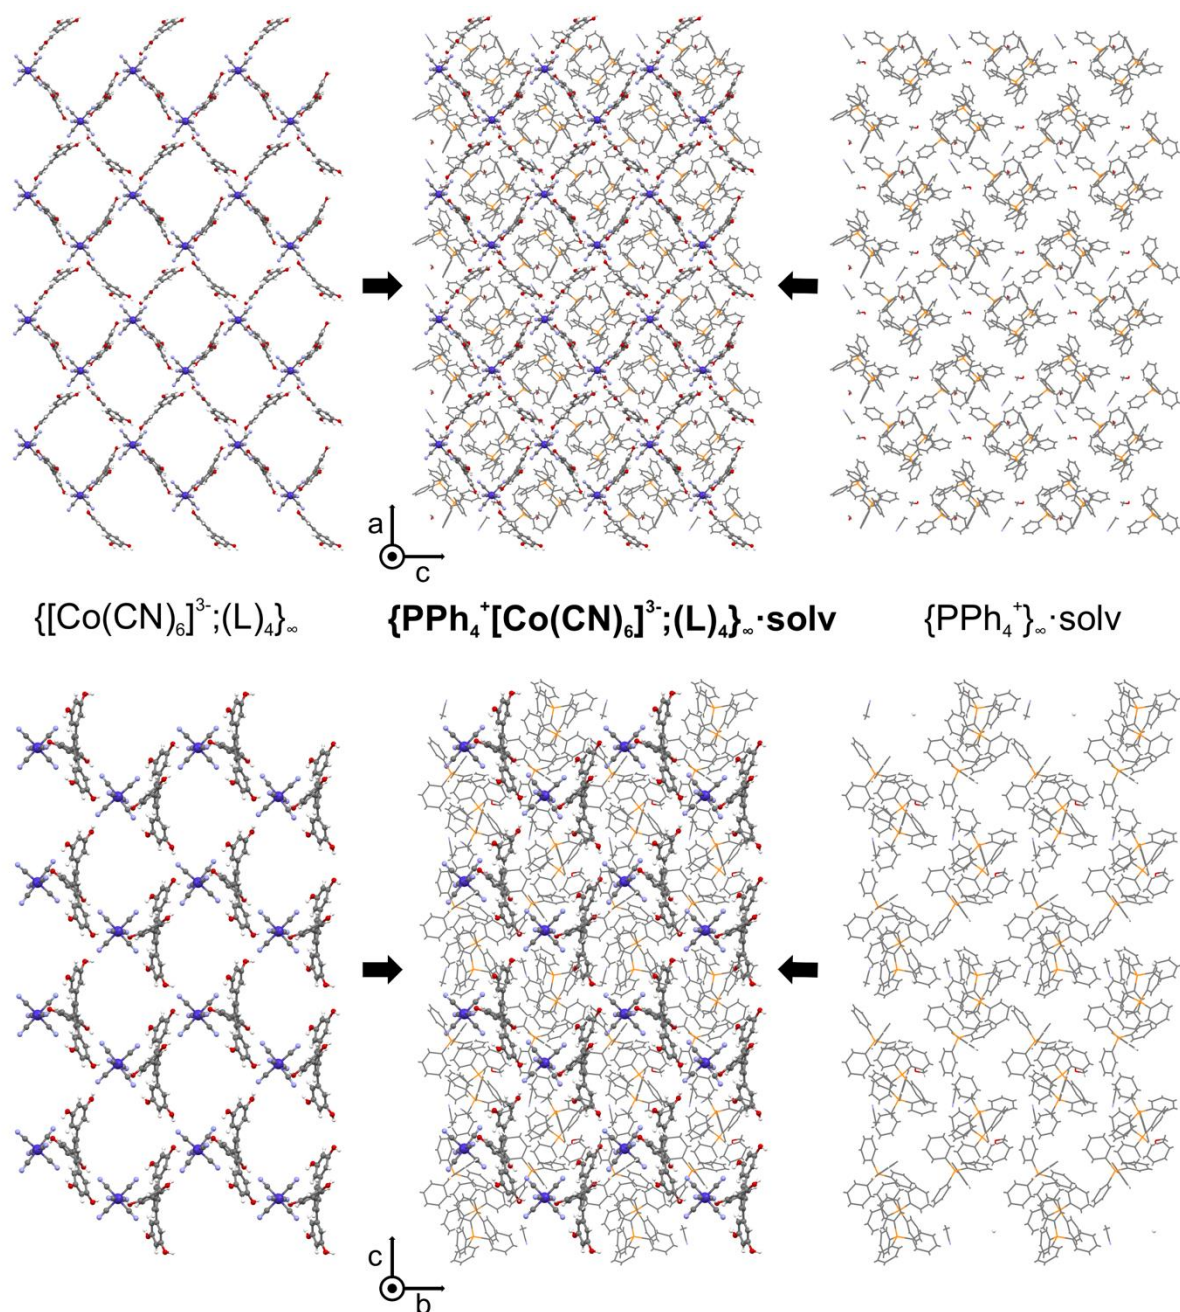

**Figure S4.** Crystal structures of **CoDiR** (top; projection along the *b* crystallographic direction) and **CoTriRB** (bottom; projection along the *a* crystallographic direction): hydrogen-bonded  $\{[\text{Co}(\text{CN})_6]^{3-}; \text{L}_n\}_\infty$  subnetworks (*left panel*), organic cations and solvent molecules  $\{\text{PPh}_4^+\}_\infty \cdot \text{solv}$  subnetwork (*right panel*), and complete projection (*middle panel*).

**Table S1.** Crystal data and structure refinement of **MDiR**.

| Compound                                    |                               | CrDiR                                                                                                     | FeDiR                                                                                                     | CoDiR                                                                                                     |
|---------------------------------------------|-------------------------------|-----------------------------------------------------------------------------------------------------------|-----------------------------------------------------------------------------------------------------------|-----------------------------------------------------------------------------------------------------------|
| <i>Crystal data</i>                         |                               |                                                                                                           |                                                                                                           |                                                                                                           |
| formula                                     |                               | C <sub>107</sub> H <sub>90</sub> CrN <sub>8</sub> O <sub>9</sub> P <sub>3</sub>                           | C <sub>108</sub> H <sub>89</sub> FeN <sub>9</sub> O <sub>8</sub> P <sub>3</sub>                           | C <sub>106</sub> H <sub>91</sub> CoN <sub>7</sub> O <sub>10</sub> P <sub>3</sub>                          |
| formula weight / g·mol <sup>-1</sup>        |                               | 1776.77                                                                                                   | 1789.64                                                                                                   | 1774.69                                                                                                   |
| <i>T</i> / K                                |                               | 100.0                                                                                                     |                                                                                                           |                                                                                                           |
| $\lambda$ / Å                               |                               | 0.71073 (MoK $\alpha$ )                                                                                   |                                                                                                           |                                                                                                           |
| crystal system                              |                               | orthorhombic                                                                                              |                                                                                                           |                                                                                                           |
| space group                                 |                               | <i>Pna</i> 2 <sub>1</sub>                                                                                 |                                                                                                           |                                                                                                           |
| cell parameters                             | <i>a</i> / Å                  | 40.1199(11)                                                                                               | 39.6424(11)                                                                                               | 39.5914(10)                                                                                               |
|                                             | <i>b</i> / Å                  | 13.7205(5)                                                                                                | 13.8089(4)                                                                                                | 13.6914(3)                                                                                                |
|                                             | <i>c</i> / Å                  | 16.8199(5)                                                                                                | 16.7336(5)                                                                                                | 16.6951(4)                                                                                                |
|                                             | $\alpha, \beta, \gamma$ / deg | 90                                                                                                        |                                                                                                           |                                                                                                           |
|                                             | <i>V</i> / Å <sup>3</sup>     | 9258.8(5)                                                                                                 | 9160.3(5)                                                                                                 | 9049.8(4)                                                                                                 |
| <i>Z</i>                                    |                               | 4                                                                                                         |                                                                                                           |                                                                                                           |
| $\rho_{calc}$ / g·cm <sup>-3</sup>          |                               | 1.275                                                                                                     | 1.298                                                                                                     | 1.303                                                                                                     |
| $\mu$ / cm <sup>-1</sup>                    |                               | 0.240                                                                                                     | 0.282                                                                                                     | 0.308                                                                                                     |
| <i>F</i> (000)                              |                               | 3716.0                                                                                                    | 3740.0                                                                                                    | 3712.0                                                                                                    |
| crystal type                                |                               | colorless plate                                                                                           | pale yellow plate                                                                                         | colourless plate                                                                                          |
| crystal size / mm × mm × mm                 |                               | 0.5 × 0.18 × 0.15                                                                                         | 0.37 × 0.12 × 0.09                                                                                        | 0.61 × 0.19 × 0.15                                                                                        |
| <i>Data collection</i>                      |                               |                                                                                                           |                                                                                                           |                                                                                                           |
| $2\theta$ range / deg                       |                               | 5.03 to 50.054                                                                                            | 4.776 to 50.054                                                                                           | 4.932 to 51.36                                                                                            |
| limiting indices                            |                               | -47 ≤ <i>h</i> ≤ 47<br>-16 ≤ <i>k</i> ≤ 16<br>-20 ≤ <i>l</i> ≤ 19                                         | -47 ≤ <i>h</i> ≤ 47<br>-16 ≤ <i>k</i> ≤ 16<br>-19 ≤ <i>l</i> ≤ 19                                         | -48 ≤ <i>h</i> ≤ 48<br>-16 ≤ <i>k</i> ≤ 16<br>-20 ≤ <i>l</i> ≤ 20                                         |
| collected reflections                       |                               | 81023                                                                                                     | 79649                                                                                                     | 74856                                                                                                     |
| independent reflections                     |                               | 16006 [ <i>R</i> <sub>sigma</sub> = 0.0534]                                                               | 16055 [ <i>R</i> <sub>sigma</sub> = 0.0519]                                                               | 17083 [ <i>R</i> <sub>sigma</sub> = 0.0505]                                                               |
| <i>R</i> <sub>int</sub>                     |                               | 0.0615                                                                                                    | 0.0588                                                                                                    | 0.0512                                                                                                    |
| <i>Refinement</i>                           |                               |                                                                                                           |                                                                                                           |                                                                                                           |
| data/restraints/parameters                  |                               | 16006/1/1165                                                                                              | 16055/7/1173                                                                                              | 17083/33/1183                                                                                             |
| <i>GOF</i> on <i>F</i> <sup>2</sup>         |                               | 1.176                                                                                                     | 1.115                                                                                                     | 1.146                                                                                                     |
| final <i>R</i> indices                      |                               | <i>R</i> <sub>1</sub> = 0.0546 [ <i>I</i> ≥ 2σ( <i>I</i> )]<br><i>wR</i> <sub>2</sub> = 0.1058 (all data) | <i>R</i> <sub>1</sub> = 0.0480 [ <i>I</i> ≥ 2σ( <i>I</i> )]<br><i>wR</i> <sub>2</sub> = 0.0985 (all data) | <i>R</i> <sub>1</sub> = 0.0486 [ <i>I</i> ≥ 2σ( <i>I</i> )]<br><i>wR</i> <sub>2</sub> = 0.0968 (all data) |
| largest diff. peak/hole / e·Å <sup>-3</sup> |                               | 0.41/-0.41                                                                                                | 0.40/-0.39                                                                                                | 0.38/-0.40                                                                                                |
| Flack <i>x</i> -parameter                   |                               | 0.024(9)                                                                                                  | 0.018(7)                                                                                                  | 0.025(5)                                                                                                  |

**Table S2.** Crystal data and structure refinement of **MTriRB**.

| Compound                                    |                    | CrTriRB                                                                         | FeTriRB                                                                         | CoTriRB                                                                                          |
|---------------------------------------------|--------------------|---------------------------------------------------------------------------------|---------------------------------------------------------------------------------|--------------------------------------------------------------------------------------------------|
| <i>Crystal data</i>                         |                    |                                                                                 |                                                                                 |                                                                                                  |
| formula                                     |                    | C <sub>107</sub> CrH <sub>93</sub> N <sub>7</sub> O <sub>9</sub> P <sub>3</sub> | C <sub>107</sub> H <sub>88</sub> FeN <sub>8</sub> O <sub>7</sub> P <sub>3</sub> | C <sub>213</sub> H <sub>172</sub> Co <sub>2</sub> N <sub>16</sub> O <sub>13</sub> P <sub>6</sub> |
| formula weight / g·mol <sup>-1</sup>        |                    | 1765.79                                                                         | 1746.61                                                                         | 3467.34                                                                                          |
| T / K                                       |                    | 100.0                                                                           |                                                                                 |                                                                                                  |
| λ / Å                                       |                    | 0.71073 (MoKα)                                                                  |                                                                                 |                                                                                                  |
| crystal system                              |                    | monoclinic                                                                      | orthorhombic                                                                    | monoclinic                                                                                       |
| space group                                 |                    | Cc                                                                              | P2 <sub>1</sub> 2 <sub>1</sub> 2                                                | P2 <sub>1</sub>                                                                                  |
| cell parameters                             | a / Å              | 28.5867(7)                                                                      | 19.7524(6)                                                                      | 16.7094(4)                                                                                       |
|                                             | b / Å              | 15.4118(4)                                                                      | 27.2819(8)                                                                      | 18.0176(5)                                                                                       |
|                                             | c / Å              | 24.4014(10)                                                                     | 17.0927(5)                                                                      | 30.2050(7)                                                                                       |
|                                             | α / deg            | 90                                                                              | 90                                                                              | 90                                                                                               |
|                                             | β / deg            | 121.2300(10)                                                                    | 90                                                                              | 96.8650(10)                                                                                      |
|                                             | γ / deg            | 90                                                                              | 90                                                                              | 90                                                                                               |
|                                             | V / Å <sup>3</sup> | 9192.7(5)                                                                       | 9211.0(5)                                                                       | 9028.4(4)                                                                                        |
| Z                                           |                    | 4                                                                               |                                                                                 | 2                                                                                                |
| ρ <sub>calc</sub> / g·cm <sup>-3</sup>      |                    | 1.276                                                                           | 1.260                                                                           | 1.275                                                                                            |
| μ / cm <sup>-1</sup>                        |                    | 0.241                                                                           | 0.277                                                                           | 0.305                                                                                            |
| F(000)                                      |                    | 3700.0                                                                          | 3652.0                                                                          | 3620.0                                                                                           |
| crystal type                                |                    | colourless plate                                                                | yellow plate                                                                    | colourless plate                                                                                 |
| crystal size / mm × mm × mm                 |                    | 0.6 × 0.27 × 0.22                                                               | 0.4 × 0.15 × 0.1                                                                | 0.42 × 0.32 × 0.11                                                                               |
| <i>Data collection</i>                      |                    |                                                                                 |                                                                                 |                                                                                                  |
| 2θ range / deg                              |                    | 5.066 to 50.054                                                                 | 4.386 to 52.044                                                                 | 4.498 to 50.054                                                                                  |
| limiting indices                            |                    | -34 ≤ h ≤ 34<br>-18 ≤ k ≤ 18<br>-29 ≤ l ≤ 29                                    | -24 ≤ h ≤ 24<br>-33 ≤ k ≤ 33<br>-21 ≤ l ≤ 21                                    | -19 ≤ h ≤ 19<br>-21 ≤ k ≤ 21<br>-35 ≤ l ≤ 31                                                     |
| collected reflections                       |                    | 60397                                                                           | 122720                                                                          | 74347                                                                                            |
| independent reflections                     |                    | 16199 [R <sub>sigma</sub> = 0.0314]                                             | 18148 [R <sub>sigma</sub> = 0.0346]                                             | 31771 [R <sub>sigma</sub> = 0.0580]                                                              |
| R <sub>int</sub>                            |                    | 0.0276                                                                          | 0.0461                                                                          | 0.0330                                                                                           |
| <i>Refinement</i>                           |                    |                                                                                 |                                                                                 |                                                                                                  |
| data/restraints/parameters                  |                    | 16199/2/1097                                                                    | 18148/57/1149                                                                   | 31771/72/2354                                                                                    |
| GOF on F <sup>2</sup>                       |                    | 1.059                                                                           | 1.110                                                                           | 1.050                                                                                            |
| final R indices                             |                    | R <sub>I</sub> = 0.0308 [I ≥ 2σ(I)]<br>wR <sub>2</sub> = 0.0702 (all data)      | R <sub>I</sub> = 0.0469 [I ≥ 2σ(I)]<br>wR <sub>2</sub> = 0.1133 (all data)      | R <sub>I</sub> = 0.0465 [I ≥ 2σ(I)]<br>wR <sub>2</sub> = 0.1018 (all data)                       |
| largest diff. peak/hole / e·Å <sup>-3</sup> |                    | 0.28/-0.27                                                                      | 0.90/-0.43                                                                      | 0.73/-0.41                                                                                       |
| Flack x-parameter                           |                    | 0.014(4)                                                                        | 0.016(4)                                                                        | 0.019(4)                                                                                         |

**Table S3.** The most important bond lengths (in Å) and angles (in deg) for **MDiR**. Detailed metric parameters of hexacyanidometallate anions.

| compound | <b>CrDiR</b> | <b>FeDiR</b> | <b>CoDiR</b> |
|----------|--------------|--------------|--------------|
| M =      | <b>Cr</b>    | <b>Fe</b>    | <b>Co</b>    |
| M=C      | 2.077(5)     | 1.933(5)     | 1.896(4)     |
|          | 2.055(5)     | 1.936(5)     | 1.898(5)     |
|          | 2.064(5)     | 1.934(5)     | 1.894(5)     |
|          | 2.060(5)     | 1.938(5)     | 1.909(4)     |
|          | 2.070(5)     | 1.945(5)     | 1.894(4)     |
|          | 2.066(5)     | 1.940(5)     | 1.901(5)     |
| C≡N      | 1.142(6)     | 1.151(6)     | 1.152(5)     |
|          | 1.147(6)     | 1.148(6)     | 1.154(6)     |
|          | 1.147(6)     | 1.154(6)     | 1.149(6)     |
|          | 1.153(6)     | 1.153(6)     | 1.133(6)     |
|          | 1.153(6)     | 1.148(6)     | 1.147(6)     |
|          | 1.148(6)     | 1.145(6)     | 1.142(6)     |
| M-C≡N    | 177.1(4)     | 177.5(4)     | 177.5(4)     |
|          | 175.1(5)     | 178.5(4)     | 176.8(4)     |
|          | 175.1(5)     | 177.4(4)     | 178.2(4)     |
|          | 178.8(5)     | 178.4(4)     | 176.7(4)     |
|          | 177.5(4)     | 177.9(4)     | 177.7(4)     |
|          | 177.3(4)     | 177.7(5)     | 176.7(4)     |

**Table S4.** The most important bond lengths (in Å) and angles (in deg) for **MTriRB**. Detailed metric parameters of hexacyanidometallate anions.

| compound | <b>CrTriRB</b> | <b>FeTriRB</b> | <b>CoTriRB<sup>a</sup></b> |                        |
|----------|----------------|----------------|----------------------------|------------------------|
| M =      | <b>Cr</b>      | <b>Fe</b>      | <b>Co<sup>01</sup></b>     | <b>Co<sup>02</sup></b> |
| M=C      | 2.079(3)       | 1.934(4)       | 1.910(4)                   | 1.881(5)               |
|          | 2.083(3)       | 1.945(4)       | 1.899(5)                   | 1.901(5)               |
|          | 2.068(3)       | 1.949(4)       | 1.895(4)                   | 1.901(5)               |
|          | 2.074(3)       | 1.935(4)       | 1.894(4)                   | 1.896(5)               |
|          | 2.061(3)       | 1.941(4)       | 1.907(5)                   | 1.891(5)               |
|          | 2.069(3)       | 1.929(4)       | 1.891(4)                   | 1.894(5)               |
| C≡N      | 1.142(4)       | 1.151(5)       | 1.148(5)                   | 1.153(6)               |
|          | 1.148(4)       | 1.157(5)       | 1.142(6)                   | 1.139(6)               |
|          | 1.148(4)       | 1.163(5)       | 1.140(5)                   | 1.144(6)               |
|          | 1.149(3)       | 1.148(5)       | 1.147(5)                   | 1.144(6)               |
|          | 1.147(4)       | 1.156(5)       | 1.136(5)                   | 1.146(6)               |
|          | 1.144(4)       | 1.155(5)       | 1.143(5)                   | 1.148(6)               |
| M-C≡N    | 177.2(3)       | 176.3(3)       | 177.8(4)                   | 177.4(4)               |
|          | 178.1(2)       | 178.6(3)       | 177.7(4)                   | 179.0(4)               |
|          | 175.6(3)       | 177.5(3)       | 178.9(4)                   | 179.3(5)               |
|          | 174.2(2)       | 177.9(4)       | 178.3(4)                   | 177.9(4)               |
|          | 178.4(3)       | 175.8(3)       | 178.6(4)                   | 177.3(5)               |
|          | 173.7(3)       | 178.5(4)       | 178.3(4)                   | 177.6(5)               |

<sup>a</sup> Two crystallographically independent [Co(CN)<sub>6</sub>]<sup>3-</sup> complexes were described.

**Table S5.** Important hydrogen bonding distances (in Å) and angles (in deg) in  ${}_L\text{O-H}\cdots\text{N}_{\text{M-C}\equiv\text{N}}$  subnetworks of **MDiR**.<sup>a</sup>

|                           | <b>CrDiR</b>             |                    |                    |                            | <b>FeDiR</b>            |                    |                    |                            | <b>CoDiR</b>            |                    |                    |                            |
|---------------------------|--------------------------|--------------------|--------------------|----------------------------|-------------------------|--------------------|--------------------|----------------------------|-------------------------|--------------------|--------------------|----------------------------|
|                           | D-H $\cdots$ A           | D $\cdots$ A<br>/Å | H $\cdots$ A<br>/Å | D-<br>H $\cdots$ A<br>/deg | D-H $\cdots$ A          | D $\cdots$ A<br>/Å | H $\cdots$ A<br>/Å | D-<br>H $\cdots$ A<br>/deg | D-H $\cdots$ A          | D $\cdots$ A<br>/Å | H $\cdots$ A<br>/Å | D-<br>H $\cdots$ A<br>/deg |
| <i>side</i><br>synthon    | O5L-<br>H5L $\cdots$ N5  | 2.775              | 1.941              | 172.3                      | O1L-<br>H1L $\cdots$ N6 | 2.741              | 1.901              | 176.6                      | O1L-<br>H1L $\cdots$ N6 | 2.736              | 1.902              | 174.8                      |
|                           | O8L-<br>H8LA $\cdots$ N4 | 2.693              | 1.870              | 165.9                      | O4L-<br>H4L $\cdots$ N1 | 2.715              | 1.896              | 164.5                      | O3L-<br>H3L $\cdots$ N4 | 2.740              | 1.917              | 178.7                      |
|                           | O7L-<br>H7L $\cdots$ N2  | 2.710              | 1.874              | 172.8                      | O3L-<br>H3L $\cdots$ N3 | 2.830              | 2.005              | 167.1                      | O2L-<br>H2L $\cdots$ N1 | 2.801              | 1.982              | 164.6                      |
|                           | O6L-<br>H6L $\cdots$ N3  | 2.704              | 1.883              | 165.3                      | O2L-<br>H2L $\cdots$ N2 | 2.724              | 1.933              | 156.5                      | O4L-<br>H4L $\cdots$ N5 | 2.724              | 1.908              | 163.2                      |
| <b>av.</b>                | <b>2.72</b>              | <b>1.89</b>        | <b>169.1</b>       |                            | <b>2.75</b>             | <b>1.93</b>        | <b>166.1</b>       |                            | <b>2.75</b>             | <b>1.93</b>        | <b>170.3</b>       |                            |
| <i>frontal</i><br>synthon | O1L-<br>H1L $\cdots$ N5  | 2.874              | 2.051              | 166.4                      | O7L-<br>H7L $\cdots$ N4 | 2.754              | 1.915              | 177.0                      | O7L-<br>H7L $\cdots$ N3 | 2.739              | 1.900              | 176.6                      |
|                           | O2L-<br>H2L $\cdots$ N6  | 2.766              | 1.927              | 177.5                      | O8L-<br>H8L $\cdots$ N3 | 2.828              | 1.991              | 174.4                      | O8L-<br>H8L $\cdots$ N1 | 2.877              | 2.040              | 174.2                      |
|                           | O4L-<br>H4L $\cdots$ N1  | 2.731              | 1.896              | 172.0                      | O5L-<br>H5L $\cdots$ N5 | 2.751              | 1.925              | 167.5                      | O6L-<br>H6L $\cdots$ N2 | 2.731              | 1.897              | 172.0                      |
| <b>av.</b>                | <b>2.79</b>              | <b>1.96</b>        | <b>172.0</b>       |                            | <b>2.78</b>             | <b>1.94</b>        | <b>173.0</b>       |                            | <b>2.78</b>             | <b>1.95</b>        | <b>174.2</b>       |                            |

<sup>a</sup> D – hydrogen bond donor L = DiR; A – hydrogen bond acceptor  $[\text{M}(\text{CN})_6]^{3-}$ .

**Table S6.** Important hydrogen bonding distances (in Å) and angles (in deg) in  ${}_L\text{O-H}\cdots\text{N}_{\text{M-C}\equiv\text{N}}$  subnetworks of **CrTriRB** and **FeTriRB**.<sup>a</sup>

|                           | <b>CrTriRB</b>          |                    |                    |                        | <b>FeTriRB</b>           |                    |                    |                        |
|---------------------------|-------------------------|--------------------|--------------------|------------------------|--------------------------|--------------------|--------------------|------------------------|
|                           | D-H $\cdots$ A          | D $\cdots$ A<br>/Å | H $\cdots$ A<br>/Å | D-H $\cdots$ A<br>/deg | D-H $\cdots$ A           | D $\cdots$ A<br>/Å | H $\cdots$ A<br>/Å | D-H $\cdots$ A<br>/deg |
| <i>side</i><br>synthon    | O1L-<br>H1L $\cdots$ N1 | 2.785              | 1.950              | 172.6                  | O1L-<br>H1L $\cdots$ N4  | 2.700              | 1.861              | 176.6                  |
|                           | O6L-<br>H6L $\cdots$ N3 | 2.717              | 1.916              | 159.1                  | O3L-<br>H3L $\cdots$ N2  | 2.779              | 1.942              | 173.9                  |
|                           | O2L-<br>H2L $\cdots$ N2 | 2.742              | 1.904              | 174.4                  | O4L-<br>H4L $\cdots$ N3  | 2.978              | 2.145              | 171.5                  |
|                           | O3L-<br>H3L $\cdots$ N4 | 2.850              | 2.018              | 170.9                  | O5L-<br>H5L $\cdots$ N5  | 2.725              | 1.885              | 177.4                  |
| <b>av.</b>                |                         | <b>2.77</b>        | <b>1.95</b>        | <b>169.2</b>           |                          | <b>2.80</b>        | <b>1.96</b>        | <b>174.9</b>           |
| <i>frontal</i><br>synthon | O4L-<br>H4L $\cdots$ N5 | 2.664              | 1.856              | 160.9                  | O6L-<br>H6LA $\cdots$ N6 | 2.684              | 1.852              | 170.7                  |
|                           | O5L-<br>H5L $\cdots$ N6 | 2.714              | 1.880              | 171.4                  | O2L-<br>H2L $\cdots$ N1  | 2.730              | 1.890              | 178.1                  |
| <b>av.</b>                |                         | <b>2.69</b>        | <b>1.87</b>        | <b>166.2</b>           |                          | <b>2.71</b>        | <b>1.87</b>        | <b>174.4</b>           |

<sup>a</sup> D – hydrogen bond donor L = TriRB; A – hydrogen bond acceptor  $[\text{M}(\text{CN})_6]^{3-}$ .

**Table S7.** Important hydrogen bonding distances (in Å) and angles (in deg) in  $L\text{O}-\text{H}\cdots\text{N}_{\text{M}-\text{C}=\text{N}}$  subnetworks of **CoTriRB**.

|                           |                            | <b>CoTriRB</b> <sup>a</sup> |                    |                    |                                 |                        |                    |                    |                        |
|---------------------------|----------------------------|-----------------------------|--------------------|--------------------|---------------------------------|------------------------|--------------------|--------------------|------------------------|
|                           |                            | <b>Co<sup>01</sup></b>      |                    |                    |                                 | <b>Co<sup>02</sup></b> |                    |                    |                        |
|                           |                            | D-H $\cdots$ A              | D $\cdots$ A<br>/Å | H $\cdots$ A<br>/Å | D-H $\cdots$ A<br>/deg          | D-H $\cdots$ A         | D $\cdots$ A<br>/Å | H $\cdots$ A<br>/Å | D-H $\cdots$ A<br>/deg |
| <i>side</i><br>synthon    | O4L–<br>H4L $\cdots$ N5C   | 2.716                       | 1.879              | 174.9              | O1L–<br>H1L $\cdots$ N11C       | 2.638                  | 1.803              | 172.7              |                        |
|                           | O5L–<br>H5L $\cdots$ N4C   | 2.719                       | 1.886              | 170.8              | O6L–<br>H6L $\cdots$ N7C        | 2.625                  | 1.791              | 171.8              |                        |
|                           | O7L–<br>H7L $\cdots$ N2C   | 2.683                       | 1.845              | 175.6              | O10L–<br>H10A $\cdots$ N8<br>C  | 2.741                  | 1.901              | 179.6              |                        |
|                           | O12L–<br>H12A $\cdots$ N6C | 2.685                       | 1.848              | 173.8              | O11L–<br>H11L $\cdots$ N12<br>C | 2.713                  | 1.882              | 169.7              |                        |
| <b>av.</b>                | <b>2.70</b>                | <b>1.86</b>                 | <b>173.8</b>       | <b>2.69</b>        | <b>1.84</b>                     | <b>173.5</b>           |                    |                    |                        |
| <i>frontal</i><br>synthon | O8L–<br>H8LA $\cdots$ N3C  | 2.684                       | 1.850              | 171.7              | O3L–<br>H3L $\cdots$ N9C        | 2.694                  | 1.862              | 170.4              |                        |
|                           | O9L–<br>H9L $\cdots$ N1C   | 2.776                       | 1.945              | 169.9              | O2L–<br>H2L $\cdots$ N10C       | 2.736                  | 1.919              | 164.0              |                        |
| <b>av.</b>                | <b>2.73</b>                | <b>1.90</b>                 | <b>170.8</b>       | <b>2.71</b>        | <b>1.89</b>                     | <b>167.2</b>           |                    |                    |                        |

<sup>a</sup> There are two different  $[\text{Co}(\text{CN})_6]^{3-}$  anions in the asymmetric unit, hence separate hydrogen bonds for **Co<sup>01</sup>** and **Co<sup>02</sup>**. D – hydrogen bond donor L = TriRB; A – hydrogen bond acceptor  $[\text{M}(\text{CN})_6]^{3-}$ .

**Table S8.** Distances (in Å) and angles (in deg) for X-H $\cdots$ O (X = C, O) hydrogen bonds in **MDiR**.<sup>a</sup>

| <b>CrDiR</b>               |                    |                    |                            | <b>FeDiR</b>               |                    |                    |                        | <b>CoDiR</b>               |                    |                    |                            |
|----------------------------|--------------------|--------------------|----------------------------|----------------------------|--------------------|--------------------|------------------------|----------------------------|--------------------|--------------------|----------------------------|
| O $\cdots$ H-X             | O $\cdots$ X<br>/Å | O $\cdots$ H<br>/Å | X-<br>H $\cdots$ O<br>/deg | O $\cdots$ H-X             | O $\cdots$ X<br>/Å | O $\cdots$ H<br>/Å | X-H $\cdots$ O<br>/deg | O $\cdots$ H-X             | O $\cdots$ X<br>/Å | O $\cdots$ H<br>/Å | X-<br>H $\cdots$ O<br>/deg |
| O1L $\cdots$ H3L-<br>O3L   | 2.783              | 1.967              | 164.0                      | O1L $\cdots$ H21K-<br>C21K | 3.504              | 2.672              | 146.5                  | O2L $\cdots$ H3S-<br>O3S   | 2.859              | 2.044              | 163.1                      |
| O2L $\cdots$ H3SB-<br>C3S  | 3.178              | 2.597              | 118.1                      | O2L $\cdots$ H2K-<br>C2K   | 3.401              | 2.557              | 148.3                  | O3L $\cdots$ H35K-<br>C35K | 3.486              | 2.656              | 146.3                      |
| O2L $\cdots$ H70K-<br>C70K | 3.234              | 2.427              | 142.7                      | O5L $\cdots$ H66K-<br>C66K | 3.465              | 2.571              | 156.9                  | O3L $\cdots$ H5SA-<br>C5S  | 3.370              | 2.527              | 144.2                      |
| O3L $\cdots$ H4K-<br>C4K   | 3.454              | 2.582              | 152.7                      | O6L $\cdots$ H46K-<br>C46K | 3.384              | 2.527              | 150.3                  | O4L $\cdots$ H38K-<br>C38K | 3.402              | 2.547              | 149.9                      |
| O3L $\cdots$ H53K-<br>C53K | 3.412              | 2.599              | 143.7                      | O6L $\cdots$ H71K-<br>C71K | 3.482              | 2.675              | 143.1                  | O5L $\cdots$ H21K-<br>C21K | 3.476              | 2.684              | 141.3                      |
| O4L $\cdots$ H72K-<br>C72K | 3.487              | 2.589              | 158.0                      | O7L $\cdots$ H64K-<br>C64K | 3.227              | 2.437              | 140.5                  | O5L $\cdots$ H58K-<br>C58K | 3.322              | 2.546              | 153.4                      |
| O5L $\cdots$ H1S-<br>O1S   | 2.850              | 2.048              | 159.7                      | O8L $\cdots$ H6L-<br>O6L   | 2.715              | 1.903              | 162.2                  | O6L $\cdots$ H2K-<br>C2K   | 3.438              | 2.539              | 158.2                      |
| O7L $\cdots$ H5SC-<br>C5S  | 3.460              | 2.599              | 146.7                      | -                          | -                  | -                  | -                      | O7L $\cdots$ H4K-<br>C4K   | 3.272              | 2.449              | 144.8                      |
| O8L $\cdots$ H26K-<br>C26K | 3.377              | 2.520              | 150.2                      | -                          | -                  | -                  | -                      | O8L $\cdots$ H5L-<br>O5L   | 2.783              | 1.993              | 156.5                      |
| O1S $\cdots$ H54K-<br>C54K | 3.321              | 2.571              | 136.0                      | -                          | -                  | -                  | -                      | O3S $\cdots$ H14K-<br>C14K | 3.188              | 2.424              | 137.3                      |
| O1S $\cdots$ H62K-<br>C62K | 3.231              | 2.446              | 139.9                      | -                          | -                  | -                  | -                      | O3S $\cdots$ H20K-<br>C20K | 3.284              | 2.546              | 134.7                      |

<sup>a</sup>L, K, S, SA, SB, SC are part of the designations of the individual atoms that build the crystal lattice, see Figure S2 and crystallographic files. Hydrogen atoms have been omitted for the sake of clarity.



**Table S9.** Distances (in Å) and angles (in deg) for C-H...O hydrogen bonds in **MTriRB**.<sup>a</sup>

| <b>CrTriRB</b>      |             |             |                     | <b>FeTriRB</b>      |             |             |                     | <b>CoTriRB</b>       |             |             |                     |
|---------------------|-------------|-------------|---------------------|---------------------|-------------|-------------|---------------------|----------------------|-------------|-------------|---------------------|
| O...H-X             | O...X<br>/Å | O...H<br>/Å | X-<br>H...O<br>/deg | O...H-X             | O...X<br>/Å | O...H<br>/Å | X-<br>H...O<br>/deg | O...H-X              | O...X<br>/Å | O...H<br>/Å | X-<br>H...O<br>/deg |
| O2L...H6K-<br>C6K   | 3.251       | 2.544       | 131.3               | O1L...H62K-<br>C62K | 3.339       | 2.453       | 155.1               | O1L...H38-<br>C38    | 3.126       | 2.435       | 129.3               |
|                     |             |             |                     |                     |             |             |                     | O2L...H4A-<br>C4A    | 3.059       | 2.596       | 110.3               |
| O3L...H16K-<br>C16K | 3.311       | 2.505       | 142.7               | O2L...H64K-<br>C64K | 3.528       | 2.626       | 157.5               | O2L...H106-<br>C106  | 3.290       | 2.572       | 132.6               |
| O4L...H47K-<br>C47K | 3.485       | 2.591       | 156.8               | O3L...H6K-<br>C6K   | 3.528       | 2.628       | 158.2               | O3L...H102-<br>C102  | 3.608       | 2.666       | 171.7               |
| O4L...H70K-<br>C70K | 3.206       | 2.525       | 128.8               | O5L...H1S-<br>O1S   | 2.997       | 2.170       | 168.1               | O3L...H6A-<br>C6A    | 2.988       | 2.302       | 128.6               |
| O5L...H20K-<br>C20K | 3.269       | 2.333       | 168.3               | O6L...H54K-<br>C54K | 3.144       | 2.314       | 145.6               | O4L...H132-<br>C132  | 3.439       | 2.518       | 163.3               |
| O6L...H2SC-<br>C2S  | 3.574       | 2.604       | 170.5               | -                   | -           | -           | -                   | O5L...H64-<br>C64    | 3.211       | 2.634       | 119.6               |
| O6L...H72K-<br>C72K | 3.166       | 2.412       | 136.0               | -                   | -           | -           | -                   | O6L...H144-<br>C144  | 3.591       | 2.708       | 154.7               |
| -                   | -           | -           | -                   | -                   | -           | -           | -                   | O6L...H1S-<br>O1S    | 2.694       | 1.899       | 157.3               |
| -                   | -           | -           | -                   | -                   | -           | -           | -                   | O6L...H9SA-<br>C9S   | 3.126       | 2.703       | 106.5               |
| -                   | -           | -           | -                   | -                   | -           | -           | -                   | O7L...H86-<br>C86    | 3.211       | 2.428       | 139.6               |
| -                   | -           | -           | -                   | -                   | -           | -           | -                   | O8L...H130-<br>C130  | 3.468       | 2.555       | 161.3               |
| -                   | -           | -           | -                   | -                   | -           | -           | -                   | O8L...H5SB-<br>C5S   | 3.476       | 2.715       | 134.8               |
| -                   | -           | -           | -                   | -                   | -           | -           | -                   | O11L...H7SA-<br>C7S  | 3.310       | 2.380       | 158.2               |
| -                   | -           | -           | -                   | -                   | -           | -           | -                   | O11L...H10B-<br>C10A | 3.269       | 2.554       | 132.2               |
| -                   | -           | -           | -                   | -                   | -           | -           | -                   | O12L...H104-<br>C104 | 3.156       | 2.490       | 127.1               |
| -                   | -           | -           | -                   | -                   | -           | -           | -                   | O12L...H21A-<br>C21A | 3.580       | 2.687       | 157.2               |
| -                   | -           | -           | -                   | -                   | -           | -           | -                   | O1S...H56-<br>C56    | 3.087       | 2.539       | 116.9               |
| -                   | -           | -           | -                   | -                   | -           | -           | -                   | O1S...H89-<br>C89    | 3.233       | 2.619       | 122.7               |
| -                   | -           | -           | -                   | -                   | -           | -           | -                   | O1S...H90-<br>C90    | 3.236       | 2.631       | 122.0               |

<sup>a</sup>L, K, S, SA, SB, SC are part of the designations of the individual atoms that build the crystal lattice, see Figure S3 and crystallographic files. Hydrogen atoms have been omitted for the sake of clarity.

The representative ESI-MS spectrograms measured for MeOH solutions of **FeDiR** and **FeTriRB** crystals in the negative ionization mode exhibit a mono-negative peak-set ( $m/z = 890.22^-$ ) assignable to the salt-like  $\{(\text{PPh}_4)_2[\text{Fe}(\text{CN})_6]\}^-$  aggregates, which are, however, accompanied by two progressive peak-sets attributable to cocrystal salt-like  $\{(\text{PPh}_4)_2[\text{Fe}(\text{CN})_6](\text{DiR})\}^-$  ( $m/z = 1108.27^-$ ) and  $\{(\text{PPh}_4)_2[\text{Fe}(\text{CN})_6](\text{DiR})_2\}^-$  ( $m/z = 1326.35^-$ ) aggregates for **FeDiR**, or  $\{(\text{PPh}_4)_2[\text{Fe}(\text{CN})_6](\text{TriRB})\}^-$  ( $m/z = 1292.32^-$ ) and  $\{(\text{PPh}_4)_2[\text{Fe}(\text{CN})_6](\text{TriRB})_2\}^-$  ( $m/z = 1694.42^-$ ) aggregates for **FeTriRB** (Figure S5). The positive ionization mode revealed the peak-set ( $m/z = 1565.48^+$ ) representing  $\{(\text{PPh}_4)_4[\text{Fe}(\text{CN})_6]\}^+$  aggregates in both cases, accompanied (among others) by  $\{(\text{PPh}_4)_4[\text{Fe}(\text{CN})_6](\text{DiR})\}^+$  ( $m/z = 1691.49^+$ ) and  $\{(\text{PPh}_4)_4[\text{Fe}(\text{CN})_6](\text{TriRB})\}^+$  ( $m/z = 1917.44^+$ ) peak-sets for **FeDiR** and **FeTriRB**, respectively (Figure S6). All spectrograms confirm a strong preference for the formation of aggregates of the building blocks in the gas phase, including hydrogen-bonded ones, in line with the crystallographic and computed data.

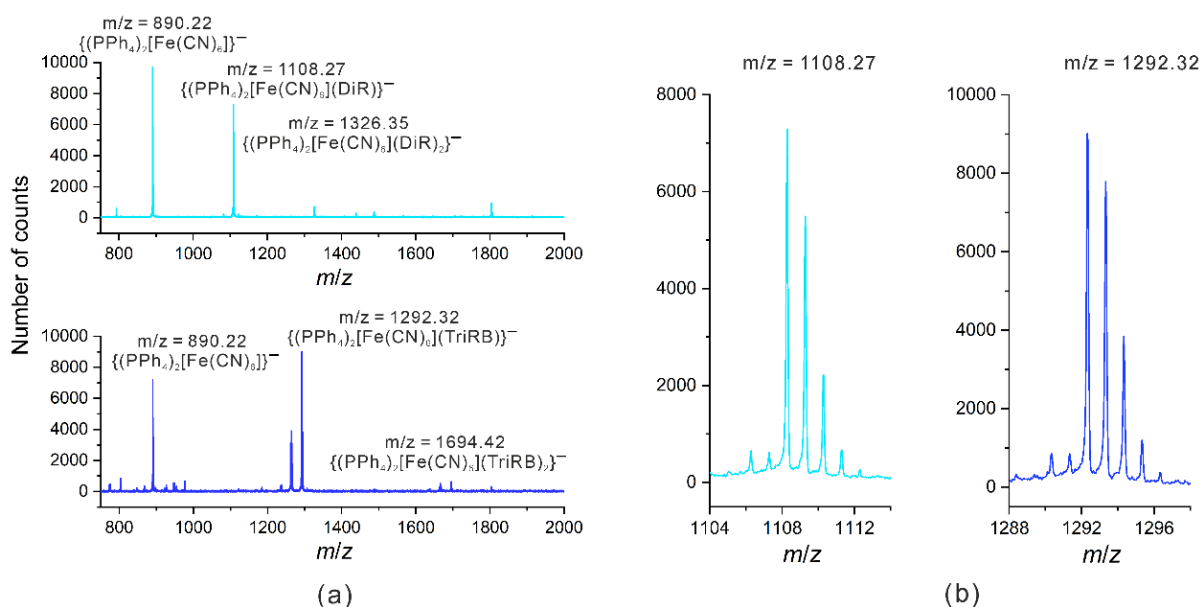

**Figure S5.** ESI-MS spectra in the negative ionization mode for **FeDiR** (cyan) and for **FeTriRB** (blue): (a)  $m/z$  range between 750<sup>-</sup> and 2000<sup>-</sup> showing the peak-sets assigned to  $\{(\text{PPh}_4)_2[\text{Fe}(\text{CN})_6](\text{DiR})_n\}^-$ , and  $\{(\text{PPh}_4)_2[\text{Fe}(\text{CN})_6](\text{TriRB})_n\}^-$  aggregates ( $n = 0, 1, 2$ ); (b) representative details of the relevant isotopic patterns. All patterns were fairly reproducible using the EnviPat software.<sup>S1</sup>

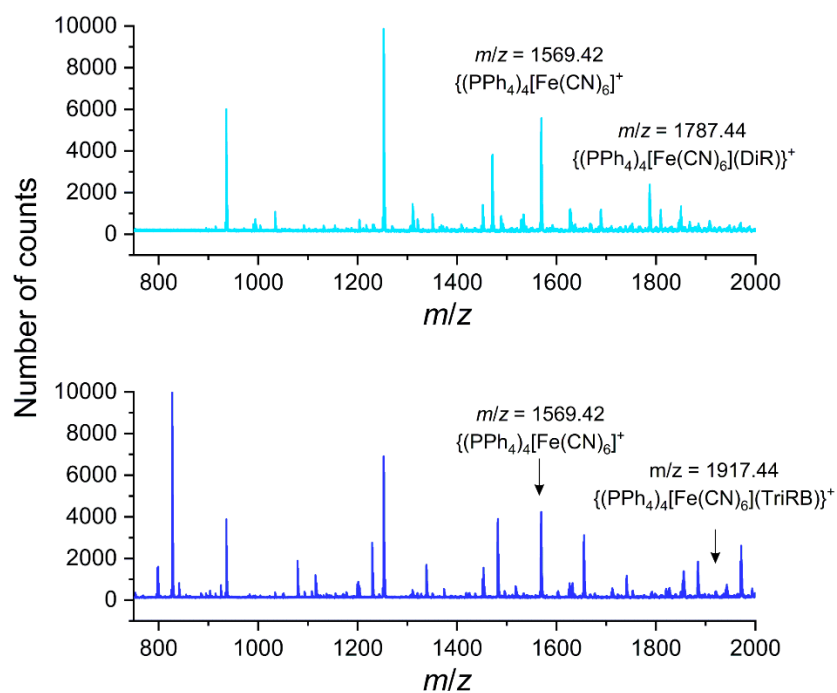

**Figure S6.** ESI-MS spectra in the positive ionization mode for **FeDiR** (cyan, top) and for **FeTriRB** (blue, bottom).

**Table S10.** Interplanar angles (in deg) formed by twisting the aromatic rings in **MDiR** and **MTriRB** (left) and visualization of the degree of rings twist in the described DiR and TriRB molecules (right). For further illustration, see **Figures S7** and **S8**.

|    |                        | A–B  | A–C  | A–D  | B–C  | B–D  | C–D  |
|----|------------------------|------|------|------|------|------|------|
|    | <b>SIJFEY</b>          | 0.00 | –    | –    | –    | –    | –    |
| Cr | DiR <sub>side</sub>    | 21.9 |      |      |      |      |      |
|    | DiR <sub>frontal</sub> | 21.4 |      |      |      |      |      |
| Fe | DiR <sub>side</sub>    | 17.2 |      |      |      |      |      |
|    | DiR <sub>frontal</sub> | 26.5 |      |      |      |      |      |
| Co | DiR <sub>side</sub>    | 23.4 |      |      |      |      |      |
|    | DiR <sub>frontal</sub> | 19.1 |      |      |      |      |      |
|    | <b>SJGAV</b>           | 34.6 | 42.6 | 43.7 | 32.7 | 67.1 | 45.8 |
| Cr | TriRB                  | 39.9 | 45.2 | 47.3 | 31.6 | 49.3 | 77.7 |
| Fe | <sup>1</sup> TriRB     | 44.9 | 40.6 | 40.6 | 42.5 | 42.5 | 71.7 |
|    | <sup>2</sup> TriRB     | 51.2 | 49.8 | 49.8 | 51.4 | 51.4 | 89.6 |
| Co | <sup>1</sup> TriRB     | 34.9 | 57.8 | 33.9 | 50.1 | 30.6 | 78.4 |
|    | <sup>2</sup> TriRB     | 36.4 | 43.4 | 43.1 | 40.8 | 36.9 | 74.2 |

DiR<sub>side</sub> is a coformer molecule containing C1L to C12L carbon atoms, while DiR<sub>frontal</sub> comprises C13L to C24L atoms. The coformers in **FeTriRB** and **CoTriRB** contain C1L to C15L, C16L to C29L, and C1L to C24L and C25L to C48L, carbon atoms, respectively.

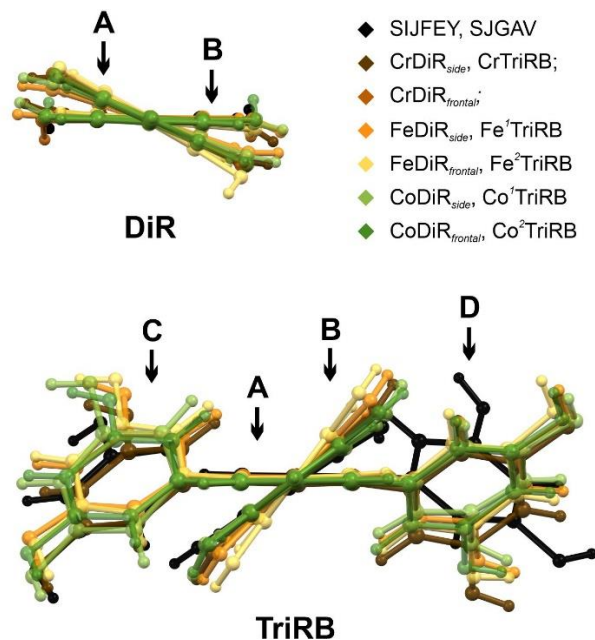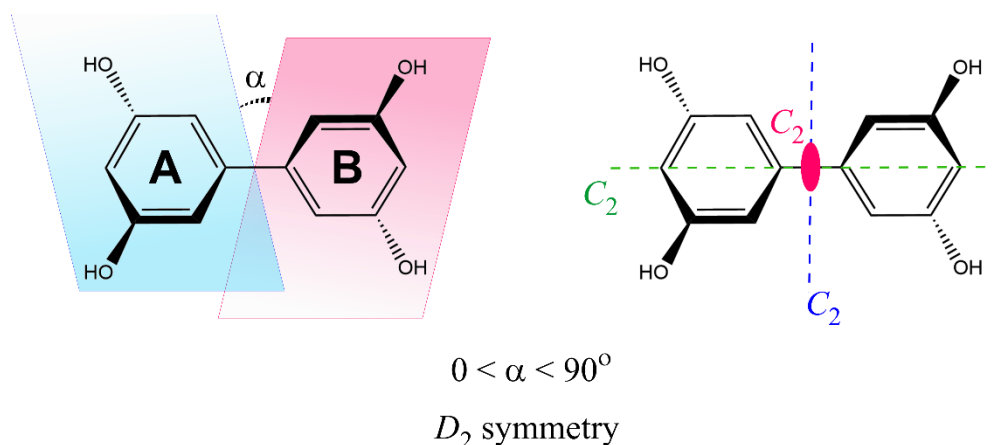

**Figure S7.** Schematic illustration of the interplanar angle  $\alpha$  in DiR including the ring designation A and B (left) and visualization of three orthogonal rotation axes  $C_2$  producing the  $D_2$  symmetry point group (right). For the values of  $\alpha$ , see the upper section of **Table S10**. The positions of the phenolic protons and the resulting orientation of O–H bonds with respect to the ring were disregarded.

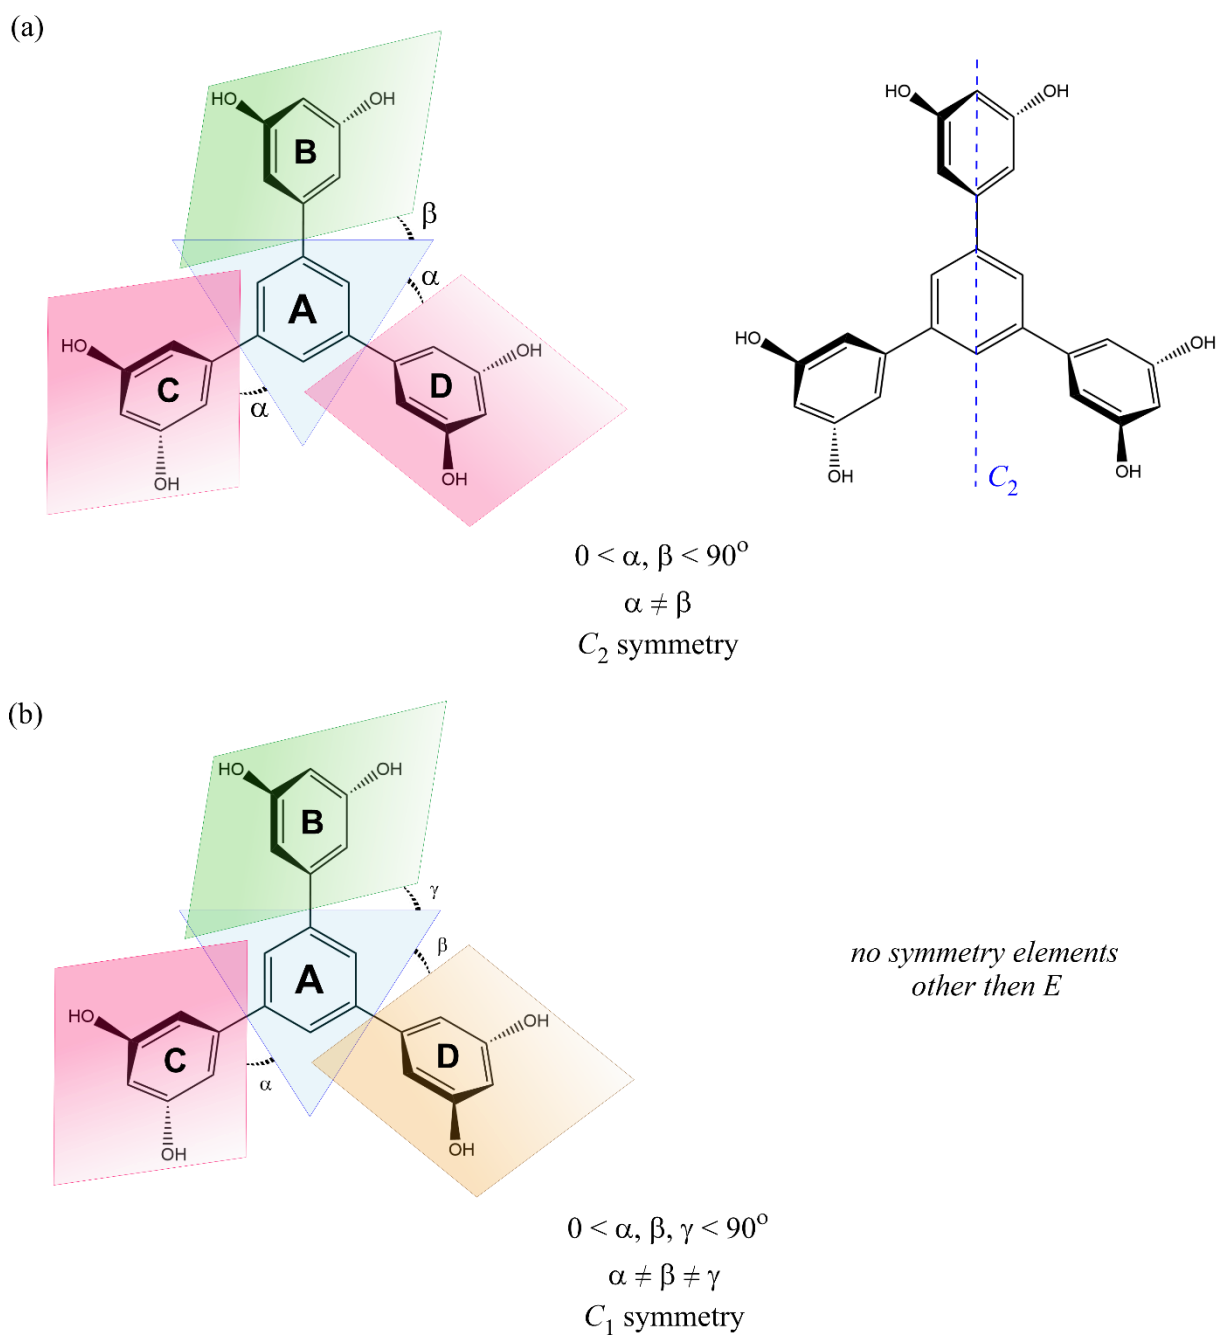

**Figure S8.** Schematic illustration of the interplanar angles  $\alpha$ ,  $\beta$ , and  $\gamma$  in TriRB (left) including the ring designation A, B, C, and D (left) and visualization of the symmetry element for the  $C_2$  or  $C_1$  symmetry point group (right): (a)  $C_2$  symmetry point group in **FeTriRB** and (b)  $C_1$  symmetry point group in **CrTriRB** and **CoTriRB**. For the values of  $\alpha$ ,  $\beta$ , and  $\gamma$ , see the bottom section of **Table S10**. The positions of the phenolic protons and the resulting orientation of the O-H bonds with respect to the ring were disregarded.

### **Discussion of the role of PPh<sub>4</sub><sup>+</sup> cation in the occurrence of noncentrosymmetric space groups.**

A statistical approach might shed some light on that issue. Therefore, we screened the CSD database for the occurrence of XPh<sub>4</sub><sup>+</sup>-containing (X = P, As) noncentrosymmetric space groups and, further, similar Sohncke groups allowing enantiopurity. We have found that out of 4523 of such crystal structures (with R<sub>int</sub> not exceeding 10) 543 (12%) were noncentrosymmetric, of which 251 (5.54%) belonged to Sohncke space groups. Such statistical results indicate that XPh<sub>4</sub><sup>+</sup> cations cannot provide the simple key to achieve a noncentrosymmetric solution. We also extracted the percentage representation of “our” space groups over the total number of 543 noncentrosymmetric space groups: P2<sub>1</sub> (87, 16.0%), Cc (55, 10.2%) Pna2<sub>1</sub> (39, 7.18%) and P2<sub>1</sub>2<sub>1</sub>2 (12 2.21%). These results make them take first, fourth, sixth, and tenth place, respectively, among the 10 space groups exceeding 10 records (418 records in total). This suggests that within this study we (statistically) hit a target of 193 (35.5%) noncentrosymmetric space groups. The dataset shown below illustrates the results of CSD screening involving other cations with the tetrahedral core, e.g. some tetraalkylammonium cations offering various lengths and flexibility of long alkyl chains.

#### **R<sub>4</sub>N<sup>+</sup> cations**

**22.4%** (597 per the total number of 2661 crystal structures) for tetramethylammonium cation,

**0%** (0 per the total number of 3759 crystal structures) for tetraethylammonium cation,

**30.8%** (134 per the total number of 435 crystal structures) for tetrapropylammonium cation,

**16.2%** (1023 per the total number of 6042 crystal structures) for tetrabutylammonium cation,

#### **R<sup>1</sup>3R<sup>2</sup>N<sup>+</sup> cations**

**39.7%** (37 per the total number of 93 crystal structures) for tripropylmethylammonium cation,

**21.4%** (3 per the total number of 14 crystal structures) for triethylmethylammonium cation.

The above statistical data confirm that the PPh<sub>4</sub><sup>+</sup> cation would not rather be considered an efficient component to contribute to the induction of the noncentrosymmetric space group, compared to other cations that reveal *ca.* two-fold or even three-fold larger number of noncentrosymmetric space groups. However, we are aware that this simple approach does not consider the role of other components in all crystal structures. Other networks involving more extended cations might also be examined, and such screening might be performed following successful future studies.

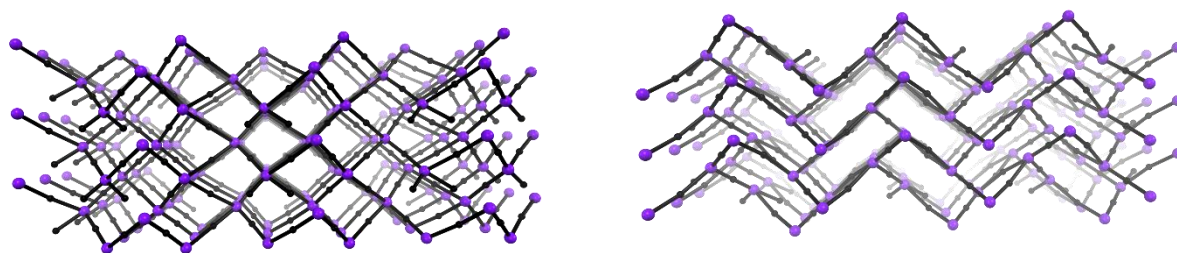

**Figure S9.** Two 3D projections of the *dmp* topology of hydrogen-bonded  $\{[M(CN)_6]^{3-};DiR_2\}_\infty$  ( $M = Cr, Fe, Co$ ) subnetworks in **MDiR** architectures along the selected mutually orthogonal directions. Legend: purple spheres –  $M$  sites representing  $[M(CN)_6]^{3-}$  anions; black spheres – centroids of the C-C bond between the DiR phenyl rings representing cofomers; black sticks – hydrogen-bonded synthons. Note that  $[M(CN)_6]^{3-}$  anions are 4-connected nodes, whereas DiR molecules are linkers.

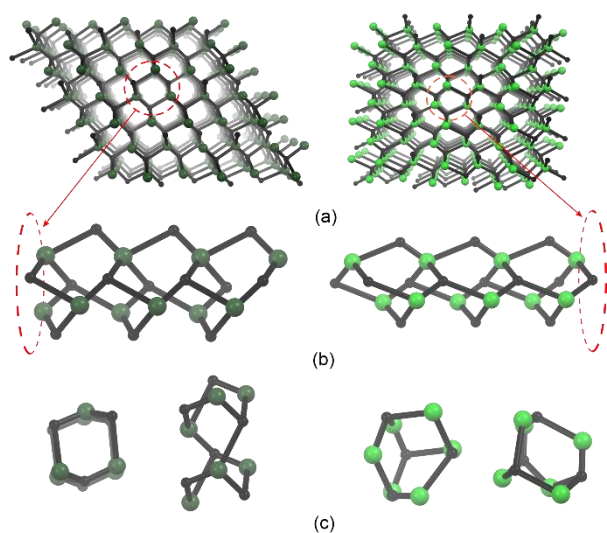

**Figure S10.** The *neb* topology of hydrogen-bonded  $\{[Cr(CN)_6]^{3-};TriRB\}_\infty$  subnetwork in **CrTriRB** (left panel) and the *dia* topology of hydrogen-bonded  $\{[Co(CN)_6]^{3-};TriRB\}_\infty$  subnetwork in **CoTriRB** (right panel): (a) selected 3D projections; (b) side views of selected 1D arrangements; (c) two projections of relevant  $6^6$  “cage” in **CrTriRB** and  $6^4$  “cage” in **CoTriRB**. Legend: dark / light green spheres – Cr / Co sites representing  $[Cr(CN)_6]^{3-}$  /  $[Co(CN)_6]^{3-}$  anions; black spheres – centroids of the central ring of TriRB representing cofomers; black sticks – hydrogen-bonded synthons. Note that both  $[M(CN)_6]^{3-}$  anions and TriRB cofomers are 4-connected nodes. The images for **CoTriRB** (right panel) are also representative of **FeTriRB**, despite the differences in the space groups.

## 2. Quantum-chemical studies on hydrogen bonding interactions

### 2.1. Computational details

Calculations were performed for hydrogen-bonded molecular clusters consisting of the hexacyanidometallate anion  $[M(CN)_6]^{3-}$  ( $M = Cr, Fe, Co$ ) and polyresorcinol molecule(s) DiR ( $\{[M(CN)_6]^{3-};(H^A H^B DiR)_2(H^A_2 DiR)(H^A DiR)\}$ ,  $\{[M(CN)_6]^{3-};(H^A H^B DiR)\}$ ,  $\{[M(CN)_6]^{3-};(H^A_2 DiR)(H^A DiR)\}$ ,  $\{[M(CN)_6]^{3-};(H^A_2 DiR)\}$  and  $\{[M(CN)_6]^{3-};(H^A DiR)\}$ ) or TriRB ( $\{[M(CN)_6]^{3-};(H^B H^C TriRB)_2(H^B TriRB)_2\}$ ,  $\{[M(CN)_6]^{3-};(H^B H^C TriRB)\}$  and  $\{[M(CN)_6]^{3-};(H^B TriRB)\}$ ), extracted from the crystal structures of **MDiR** and **MTriRB**, respectively. For the former compounds, the  $\{(DiR);(H^A DiR)\}$  motif with hydrogen bonding interaction between two polyresorcinol DiR molecules was also studied. All the molecular clusters listed above are presented in **Figures S11-S13**. The corresponding computed data for the  $\{[M(CN)_6]^{3-};(H_2 PGH)_2(HPGH_2)_2\}$ ,  $\{[M(CN)_6]^{3-};H_2 PGH\}$ , and  $\{[M(CN)_6]^{3-};HPGH_2\}$  ( $M = Cr, Fe, Co$ ;  $PGH_3 =$  phloroglucinol) molecular clusters, presented in the main text, were taken from Reference S2.

The computations were mainly carried out using the Amsterdam Density Functional (ADF) program, version 2019.304<sup>S3,S4</sup>, at the density functional theory (DFT) level with the fourth-generation Grimme's set of semiempirical dispersion corrections (D4),<sup>S5</sup> DFT+D4, employing the global hybrid B3LYP<sup>S6-S8</sup> and gradient BLYP<sup>S7,S9</sup> exchange-correlation density functionals. The calculations utilized a relativistic all-electron triple- $\xi$  singly polarized (TZP) basis set from the ADF library. Scalar relativistic effects were modeled by using the zeroth-order regular approximation (ZORA).<sup>S10,S11</sup> Note that for several motifs SCF convergence and/or spin contamination problems were encountered during the calculations using the BLYP functional, and consequently, the analysis was based on the B3LYP results. See Reference S2 for a study of the dependence of computed interaction energy values on the basis set and density functional used in the calculations, which was recently performed for the aforementioned  $[M(CN)_6]^{3-}$ /phloroglucinol motifs. As the ADF B3LYP calculations for the  $\{[Fe(CN)_6]^{3-};(HTriRB)\}$  cluster always led to a spin-contaminated wavefunction, for all the  $\{[M(CN)_6]^{3-};(HTriRB)\}$  motifs additional computations were performed using the Gaussian 16 program, version C.01,<sup>S12</sup> employing the B3LYP functional with the third-generation Grimme's set of semiempirical dispersion corrections with the Becke-Johnson damping (D3)<sup>S13,S14</sup> along with a triple- $\xi$  valence basis set augmented by polarization functions (def2-TZVP).<sup>S15,S16</sup>

The interaction energy between the hydrogen bond acceptor ( $[M(CN)_6]^{3-}$  with a spin-quartet  $d^3$  electronic configuration of Cr, spin-doublet  $d^5$  of Fe, and closed-shell  $d^6$  of Co; DiR) and the hydrogen bond donor (DiR; TriRB) molecule(s) in the examined clusters was calculated as the difference between the electronic ground-state energy of the given molecular cluster and the sum of the electronic ground-state energies of its fragments (hydrogen bond acceptor and hydrogen bond donor molecule(s)) in the geometry of the cluster. For the closed-shell motifs ( $[Co(CN)_6]^{3-}/DiR$ ,  $DiR/DiR$ ,  $[Co(CN)_6]^{3-}/TriRB$ ), ETS-NOCV<sup>S17,S18</sup> charge and energy decomposition analyses were carried out, the methodological details of which are presented briefly below.

Using the extended transition state (ETS) approach, the interaction energy,  $\Delta E_{int}$ , between the fragments in the geometry of the system can be divided into the following components:

$$\Delta E_{int} = \Delta E_{orb} + \Delta E_{pauli} + \Delta E_{elstat} (+\Delta E_{disp})$$

where:



$\Delta E_{orb}$  – corresponds to the stabilizing interactions between the occupied molecular orbitals on one fragment with the unoccupied molecular orbitals of the other fragment (describing inter-fragment donation and back-donation charge transfers), as well as the mixing of occupied and virtual orbitals within the same fragment (describing intra-fragment polarization, charge redistribution),

$\Delta E_{Pauli}$  – accounts for the repulsive Pauli interaction between occupied orbitals on the two fragments,

$\Delta E_{elstat}$  – represents the classical electrostatic interaction between the fragments in the combined system,

$\Delta E_{disp}$  – corresponds to the dispersion interaction between the fragments in the combined system, and herein was obtained at the DFT+D4 level.

The natural orbitals for chemical valence (NOCV) are eigenvectors that diagonalize the deformation density matrix in the basis of fragment orbitals. The NOCV pairs ( $\psi_{-k}$  and  $\psi_k$  with eigenvalues respectively  $-v_k$  and  $v_k$ , that is of the same absolute value but opposite signs) decompose the deformation density  $\Delta\rho$  into NOCV contributions  $\Delta\rho_k$ :

$$\Delta\rho = \sum_k \Delta\rho_k = \sum_k v_k (-\psi_{-k}^2 + \psi_k^2)$$

with  $k$  going over the pairs of NOCV's. The plots of the NOCV contributions  $\Delta\rho_k$  can be analyzed visually to assign symmetry and the direction of the density flow.

Finally, within the ETS-NOCV scheme, the orbital interaction term  $\Delta E_{orb}$  is further expressed in the NOCV representation as a sum of the orbital energy contributions  $\Delta E_k$  corresponding to the particular  $\Delta\rho_k$  channels.

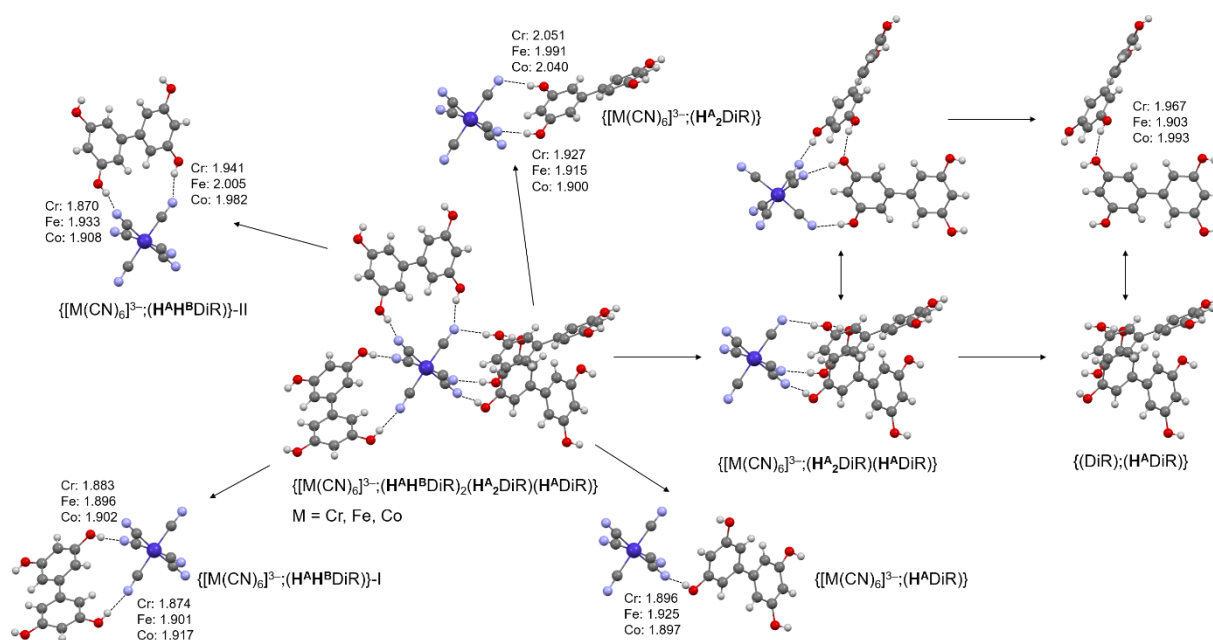

**Figure S11.** Visualization of the examined molecular clusters  $\{[M(CN)_6]^{3-};(H^A H^B DiR)_2(H^A_2 DiR)(H^A DiR)\}$ ,  $\{[M(CN)_6]^{3-};(H^A H^B DiR)\}$ ,  $\{[M(CN)_6]^{3-};(H^A_2 DiR)\}$ ,  $\{[M(CN)_6]^{3-};(H^A DiR)\}$ ,  $\{[M(CN)_6]^{3-};(H^A_2 DiR)(H^A DiR)\}$  (shown in two orientations), and  $\{(DiR);(H^A DiR)\}$  (shown in two orientations) extracted from the crystal structures of **MDiR** with  $M = Cr, Fe, \text{ and } Co$ . Numbers listed are  $O-H \cdots N$  distances, in Å.

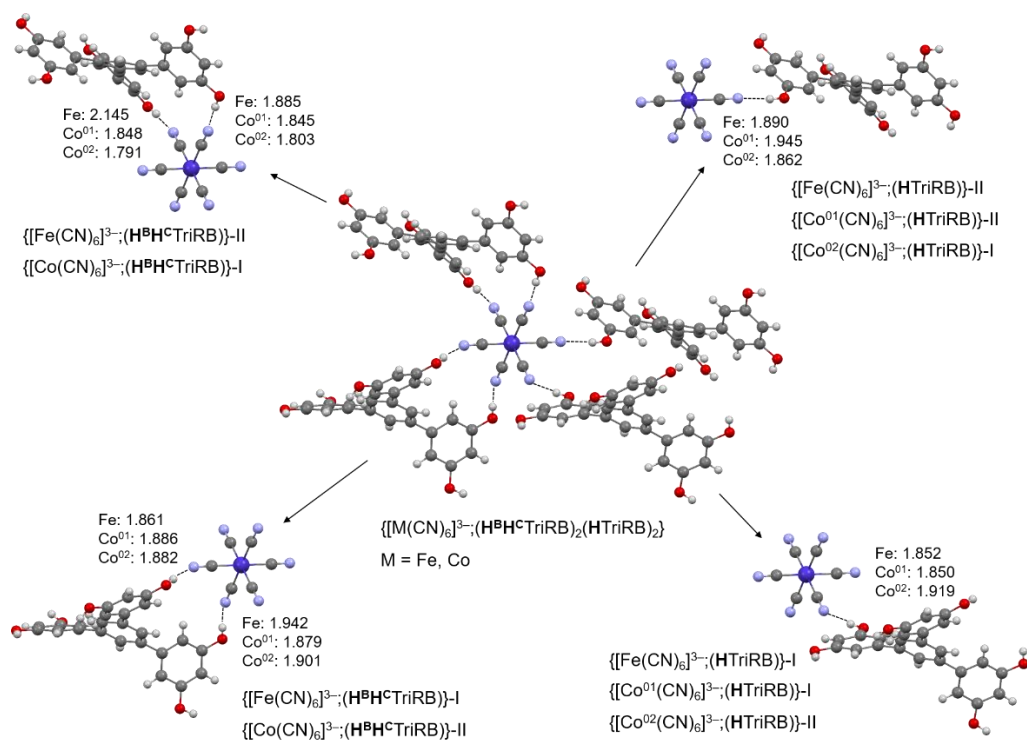

**Figure S12.** Visualization of the examined molecular clusters  $\{[M(\text{CN})_6]^{3-};(\text{H}^{\text{B}}\text{H}^{\text{C}}\text{TriRB})_2(\text{HTriRB})_2\}$ ,  $\{[M(\text{CN})_6]^{3-};(\text{H}^{\text{B}}\text{H}^{\text{C}}\text{TriRB})\}$ , and  $\{[M(\text{CN})_6]^{3-};(\text{HTriRB})\}$  extracted from the crystal structures of **MTriRB** with  $M = \text{Fe}$  and  $\text{Co}$ . Note that for **CoTriRB** there are two different  $[\text{Co}(\text{CN})_6]^{3-}$  anions in the asymmetric unit ( $\text{Co}^{\text{O1}}$  and  $\text{Co}^{\text{O2}}$ ), hence two sets of motifs were examined. Numbers listed are  $\text{O}-\text{H}\cdots\text{N}$  distances, in Å.

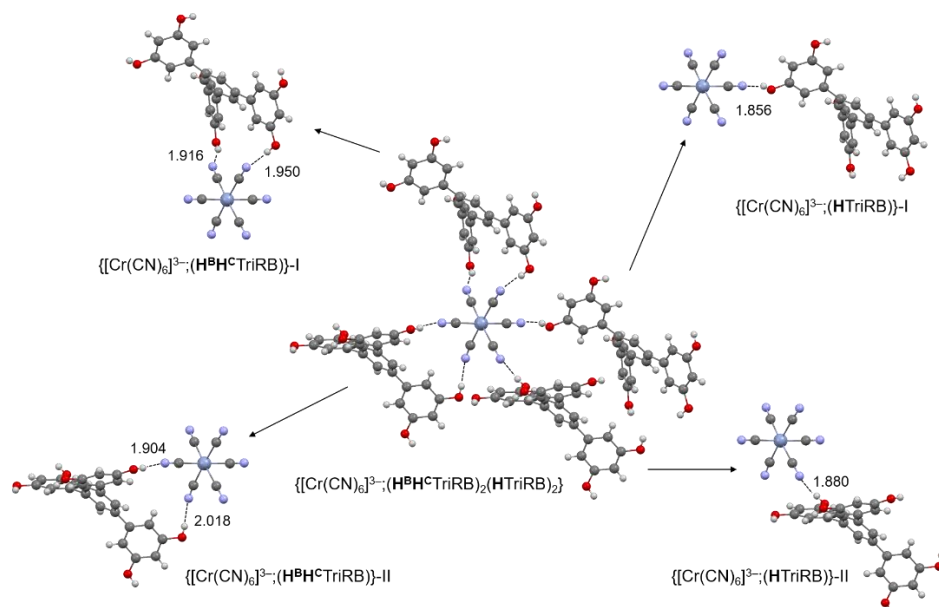

**Figure S13.** Visualization of the examined molecular clusters  $\{[\text{Cr}(\text{CN})_6]^{3-};(\text{H}^{\text{B}}\text{H}^{\text{C}}\text{TriRB})_2(\text{HTriRB})_2\}$ ,  $\{[\text{Cr}(\text{CN})_6]^{3-};(\text{H}^{\text{B}}\text{H}^{\text{C}}\text{TriRB})\}$ , and  $\{[\text{Cr}(\text{CN})_6]^{3-};(\text{HTriRB})\}$  extracted from the crystal structure of **CrTriRB**. Numbers listed are  $\text{O}-\text{H}\cdots\text{N}$  distances, in Å.

## 2.2. Calculated data

As expected and directly shown by the results of extended transition state – natural orbitals for chemical valence (ETS-NOCV) charge and bonding-energy decomposition analyses performed for the closed-shell motifs ( $[\text{Co}(\text{CN})_6]^{3-}/\text{DiR}$  and  $[\text{Co}(\text{CN})_6]^{3-}/\text{TriRB}$ : **Tables S12 and S14, Figures S14-S17 and S19-S20**), the  $[\text{M}(\text{CN})_6]^{3-}/\text{DiR}$  and  $[\text{M}(\text{CN})_6]^{3-}/\text{TriRB}$  interactions in **MDiR** and **MTriRB** involve hydrogen bonding interaction. Its covalent nature is clearly visible in the dominant NOCV contributions to the differential electron density (redistribution of electron density around  $[\text{Co}(\text{CN})_6]^{3-}$  and DiR or TriRB in the considered molecular clusters) *via* hydrogen bond acceptor and donor charge-transfer (CT) interaction between the occupied lone pair of nitrogen and the unoccupied  $\sigma^*$  orbital of the O–H bond ( $\sigma$ -CT) with participation of  $\pi$ -type orbitals of both moieties. Energetically relevant NOCV contributions demonstrate also the strong polarization (intra-CT) of the  $\pi$ -electron system within the hydrogen bond donor DiR or TriRB molecule, facilitated by the ion-dipole interaction imposed by the negative charge of the hydrogen bond acceptor  $[\text{M}(\text{CN})_6]^{3-}$ . These two effects underly significantly negative (stabilizing) values of orbital-interaction  $\Delta E_{orb}$  contribution to the total interaction energies, which is accompanied by overall even more stabilizing electrostatic  $\Delta E_{elstat}$  term, lead to the strong interactions between  $[\text{M}(\text{CN})_6]^{3-}$  and DiR or TriRB, similar to what we previously reported for the  $[\text{M}(\text{CN})_6]^{3-}/\text{phloroglucinol}$  system in Reference S2. This also accounts for a pronounced decrease in the magnitude of the total interaction energy observed for the  $\{(\text{DiR});(\text{H}^{\text{A}}\text{DiR})\}$  motif vs. the corresponding  $\{[\text{M}(\text{CN})_6]^{3-};(\text{H}^{\text{A}}\text{DiR})\}$  one (**Tables S11-S12, Figures S17-S18**), although in part this drop is probably due to not optimal arrangement of the DiR molecules enforced by the overall crystal structure network.

**Table S11.** DFT-computed (B3LYP+D4//TZP, BLYP+D4//TZP in parentheses) interaction energy values (in kcal/mol) between hexacyanometallate anion  $[\text{M}(\text{CN})_6]^{3-}$  (M = Cr, Fe, and Co) and polyresorcinol DiR molecule(s) in molecular clusters  $\{[\text{M}(\text{CN})_6]^{3-}; (\text{H}^{\text{A}}\text{H}^{\text{B}}\text{DiR})_2(\text{H}^{\text{A}_2}\text{DiR})(\text{H}^{\text{A}}\text{DiR})\}$ ,  $\{[\text{M}(\text{CN})_6]^{3-}; (\text{H}^{\text{A}}\text{H}^{\text{B}}\text{DiR})\}$ ,  $\{[\text{M}(\text{CN})_6]^{3-}; (\text{H}^{\text{A}_2}\text{DiR})(\text{H}^{\text{A}}\text{DiR})\}$ ,  $\{[\text{M}(\text{CN})_6]^{3-}; (\text{H}^{\text{A}_2}\text{DiR})\}$ , and  $\{[\text{M}(\text{CN})_6]^{3-}; (\text{H}^{\text{A}}\text{DiR})\}$ , and between the DiR molecules in  $\{(\text{DiR}); (\text{H}^{\text{A}}\text{DiR})\}$  motif, extracted from the crystal structures of **MDiR** with M = Cr, Fe, and Co. For clusters visualization, see **Figure S11**. 2HB/1HB stands for double/single hydrogen bonding interaction.

|                                                                                                                        | $[\text{Cr}(\text{CN})_6]^{3-}$ | $[\text{Fe}(\text{CN})_6]^{3-}$ | $[\text{Co}(\text{CN})_6]^{3-}$ | DiR                  |
|------------------------------------------------------------------------------------------------------------------------|---------------------------------|---------------------------------|---------------------------------|----------------------|
| $(\text{H}^{\text{A}}\text{H}^{\text{B}}\text{DiR})_2(\text{H}^{\text{A}_2}\text{DiR})(\text{H}^{\text{A}}\text{DiR})$ | -163.34<br>(-164.24)            | -168.43<br>(-169.51)            | -171.23<br>(-172.16)            | –                    |
| $(\text{H}^{\text{A}}\text{H}^{\text{B}}\text{DiR})\text{-I}$<br><i>side 2HB</i>                                       | -51.07<br>(-51.62)              | -53.64<br>(-54.70)              | -54.50<br>(-55.02)              | –                    |
| $(\text{H}^{\text{A}}\text{H}^{\text{B}}\text{DiR})\text{-II}$<br><i>side 2HB</i>                                      | -50.23<br>(-50.87)              | -50.77<br>(-52.04)              | -52.13<br>(-52.79)              | –                    |
| $(\text{H}^{\text{A}_2}\text{DiR})(\text{H}^{\text{A}}\text{DiR})$<br><i>frontal 2HB &amp; 1HB</i>                     | -78.80<br>(-80.74)              | -82.03<br>(#)                   | -82.70<br>(-84.32)              | –                    |
| $\text{H}^{\text{A}_2}\text{DiR}$<br><i>frontal 2HB</i>                                                                | -45.97<br>(-48.29)              | -47.94<br>(#)                   | -49.06<br>(†)                   | –                    |
| $\text{H}^{\text{A}}\text{DiR}$<br><i>frontal 1HB</i>                                                                  | -36.05<br>(-40.78)              | -37.48<br>(#)                   | -37.24<br>(†)                   | Cr: -5.60<br>(-5.50) |
|                                                                                                                        |                                 |                                 |                                 | Fe: -5.46<br>(-5.35) |
|                                                                                                                        |                                 |                                 |                                 | Co: -5.24<br>(-5.14) |

† Calculations failed to reach SCF convergence for the motif. # Obtained results were considered unreliable due to significant spin-contamination in the wavefunction of the molecular cluster (expectation value of  $S^2 \sim 0.93\text{-}1.10$  vs. exact 0.75).

**Table S12.** Hydrogen bond acceptor ( $[\text{Co}(\text{CN})_6]^{3-}$  or DiR) / hydrogen bond donor (DiR) energy interaction values and their components (in kcal/mol) according to the ETS energy decomposition scheme for the molecular clusters  $\{[\text{Co}(\text{CN})_6]^{3-};(\text{H}^{\text{A}}\text{H}^{\text{B}}\text{DiR})\}$ ,  $\{[\text{Co}(\text{CN})_6]^{3-};(\text{H}^{\text{A}}_2\text{DiR})(\text{H}^{\text{A}}\text{DiR})\}$ ,  $\{[\text{Co}(\text{CN})_6]^{3-};(\text{H}^{\text{A}}_2\text{DiR})\}$ ,  $\{[\text{Co}(\text{CN})_6]^{3-};(\text{H}^{\text{A}}\text{DiR})\}$ , and  $\{(\text{DiR});(\text{H}^{\text{A}}\text{DiR})\}$  extracted from the crystal structures of **MDiR** with  $M = \text{Cr, Fe, and Co}$ . For clusters visualization, see **Figure S11**. Based on B3LYP+D4//TZP and BLYP+D4//TZP (in parentheses) calculations. 2HB/1HB stands for double/single hydrogen bonding interaction.

| Molecular cluster                                                                                                                    | $\Delta E_{\text{int}}$ | $\Delta E_{\text{orb}}$ | $\Delta E_{\text{Pauli}}$ | $\Delta E_{\text{elstat}}$ | $\Delta E_{\text{disp}}$ |
|--------------------------------------------------------------------------------------------------------------------------------------|-------------------------|-------------------------|---------------------------|----------------------------|--------------------------|
| $\{[\text{Co}(\text{CN})_6]^{3-};(\text{H}^{\text{A}}\text{H}^{\text{B}}\text{DiR})\}$ -I<br><i>side 2HB</i>                         | -54.50<br>(-55.02)      | -30.49<br>(-32.23)      | 26.78<br>(29.40)          | -45.76<br>(-45.94)         | -5.03<br>(-6.26)         |
| $\{[\text{Co}(\text{CN})_6]^{3-};(\text{H}^{\text{A}}\text{H}^{\text{B}}\text{DiR})\}$ -II<br><i>side 2HB</i>                        | -52.13<br>(-52.79)      | -29.28<br>(-31.02)      | 24.53<br>(27.02)          | -42.30<br>(-42.50)         | -5.07<br>(-6.28)         |
| $\{[\text{Co}(\text{CN})_6]^{3-};(\text{H}^{\text{A}}_2\text{DiR})(\text{H}^{\text{A}}\text{DiR})\}$<br><i>frontal 2HB &amp; 1HB</i> | -82.70<br>(-84.32)      | -46.14<br>(-49.23)      | 36.29<br>(40.02)          | -64.25<br>(-64.50)         | -8.59<br>(-10.62)        |
| $\{[\text{Co}(\text{CN})_6]^{3-};(\text{H}^{\text{A}}_2\text{DiR})\}$<br><i>frontal 2HB</i>                                          | -49.06<br>(†)           | -28.32<br>(†)           | 22.51<br>(†)              | -37.07<br>(†)              | -6.19<br>(†)             |
| $\{[\text{Co}(\text{CN})_6]^{3-};(\text{H}^{\text{A}}\text{DiR})\}$<br><i>frontal 1HB</i>                                            | -37.24<br>(†)           | -19.87<br>(†)           | 13.78<br>(†)              | -28.36<br>(†)              | -2.80<br>(†)             |
| $\{(\text{DiR});(\text{H}^{\text{A}}\text{DiR})\}$<br><i>frontal 1HB</i>                                                             | Cr:<br>-5.60<br>(-5.50) | -3.18<br>(-3.47)        | 6.75<br>(7.73)            | -6.23<br>(-6.27)           | -2.94<br>(-3.48)         |
|                                                                                                                                      | Fe:<br>-5.46<br>(-5.35) | -3.67<br>(-4.00)        | 8.21<br>(9.26)            | -6.88<br>(-6.93)           | -3.11<br>(-3.69)         |
|                                                                                                                                      | Co:<br>-5.24<br>(-5.14) | -2.95<br>(-3.22)        | 6.60<br>(7.57)            | -5.90<br>(-5.95)           | -2.99<br>(-3.53)         |

† Calculations failed to reach SCF convergence for the motif.

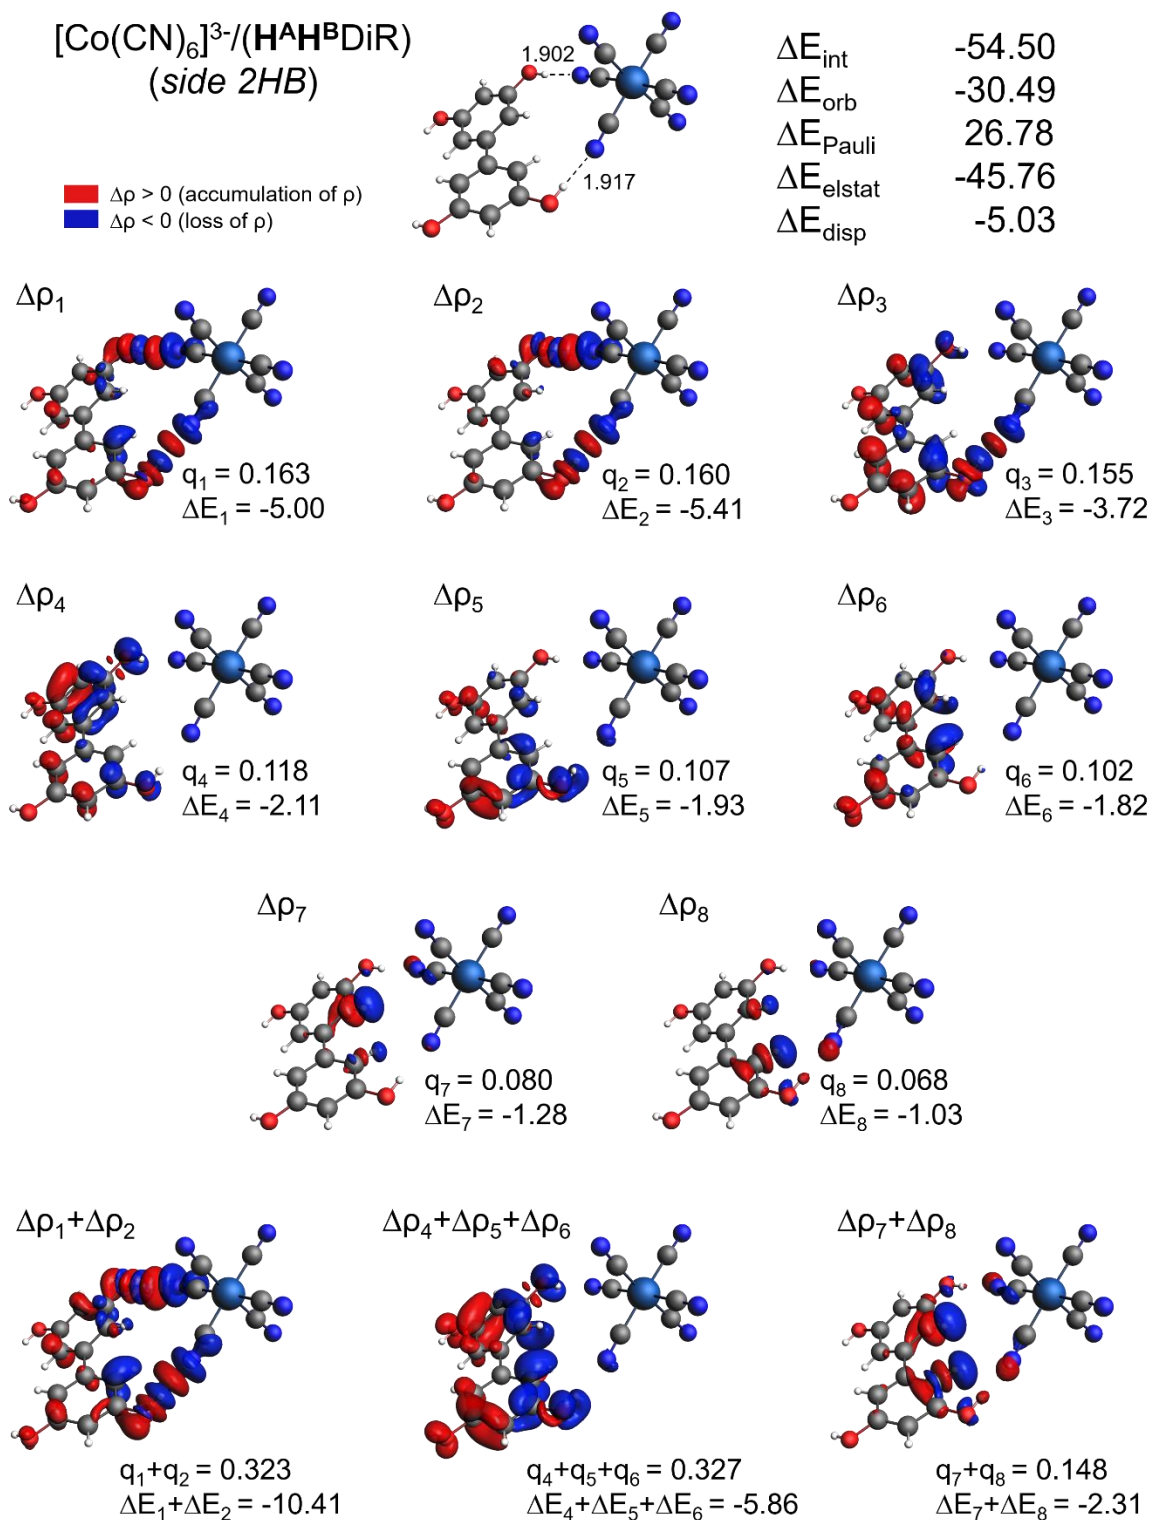

**Figure S14.** ETS-NOCV analysis of the interaction between  $[\text{Co}(\text{CN})_6]^{3-}$  and DiR molecule in the molecular cluster  $\{[\text{Co}(\text{CN})_6]^{3-};(\text{H}^{\text{A}}\text{H}^{\text{B}}\text{DiR})\}$ -I extracted from the crystal structure of **CoDiR**. Top: Molecular cluster  $\{[\text{Co}(\text{CN})_6]^{3-};(\text{H}^{\text{A}}\text{H}^{\text{B}}\text{DiR})\}$ -I with the hydrogen bond distances (in Å) listed.  $[\text{Co}(\text{CN})_6]^{3-}/(\text{H}^{\text{A}}\text{H}^{\text{B}}\text{DiR})$  energy interaction value and its components (in kcal/mol) according to the ETS energy decomposition scheme. Bottom: Isosurfaces ( $\pm 0.0005$  au) of dominant NOCV contributions to charge deformation (differential) density  $\Delta\rho$  along with their corresponding charge ( $q$  in e) and orbital energy ( $\Delta E$  in kcal/mol) assessments. Red/blue indicates inflow (gain)/outflow (loss) of electron density. Based on B3LYP+D4//TZP calculations.

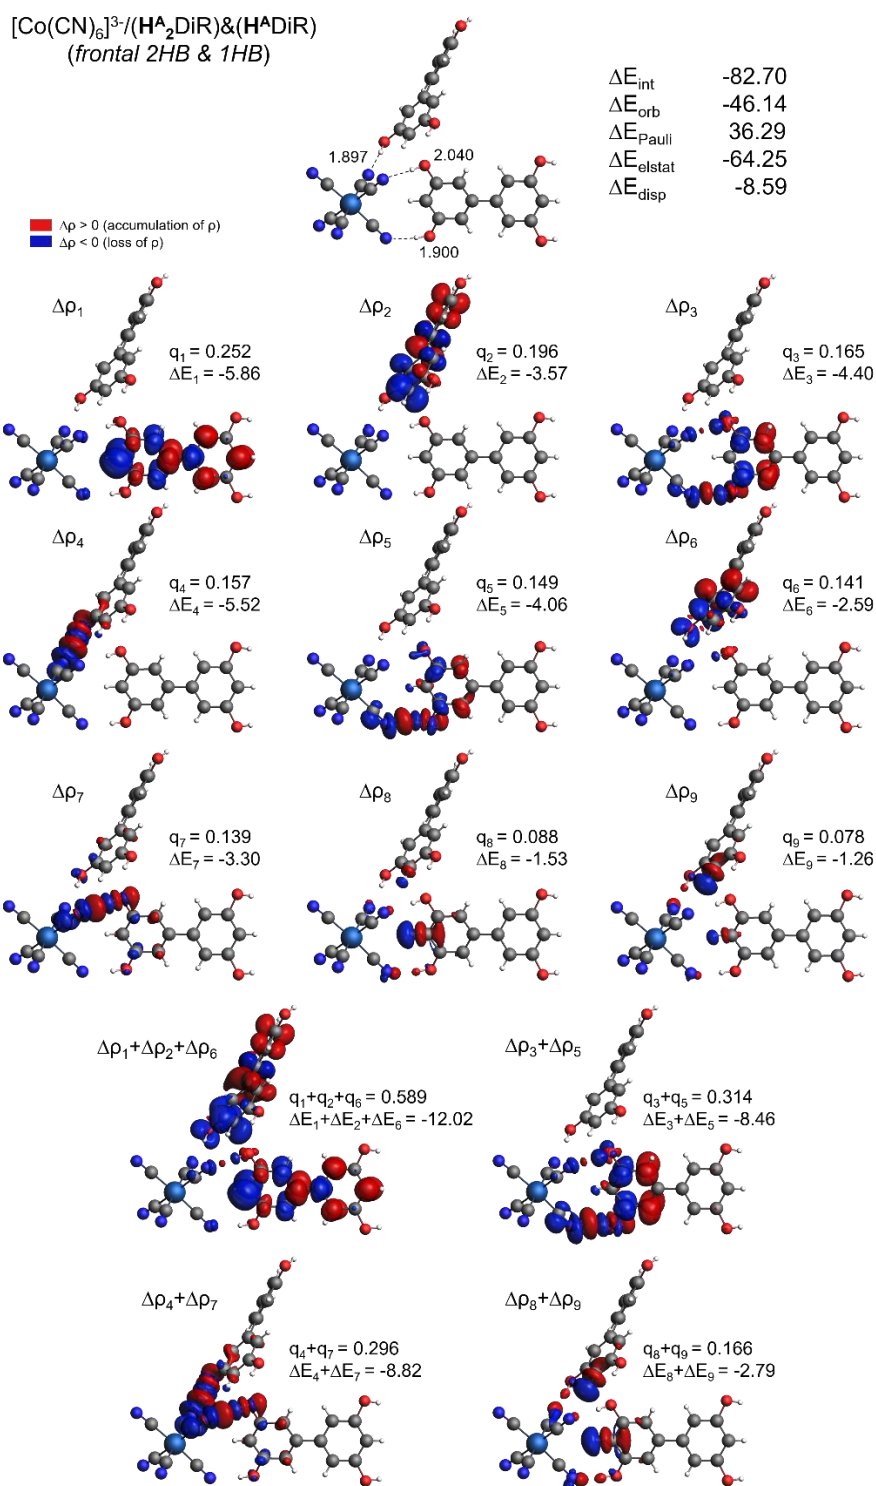

**Figure S15.** ETS-NOCV analysis of the interaction between  $[\text{Co}(\text{CN})_6]^{3-}$  and DiR molecules in the molecular cluster  $\{[\text{Co}(\text{CN})_6]^{3-};(\text{H}^{\text{A}}_2\text{DiR})(\text{H}^{\text{A}}\text{DiR})\}$  extracted from the crystal structure of **CoDiR**. Top: Molecular cluster  $\{[\text{Co}(\text{CN})_6]^{3-};(\text{H}^{\text{A}}_2\text{DiR})(\text{H}^{\text{A}}\text{DiR})\}$  with the hydrogen bond distances (in Å) listed.  $[\text{Co}(\text{CN})_6]^{3-}/(\text{H}^{\text{A}}_2\text{DiR})\&(\text{H}^{\text{A}}\text{DiR})$  energy interaction value and its components (in kcal/mol) according to the ETS energy decomposition scheme. Bottom: Isosurfaces ( $\pm 0.0005$  au) of dominant NOCV contributions to charge deformation (differential) density  $\Delta\rho$  along with their corresponding charge ( $q$  in e) and orbital energy ( $\Delta E$  in kcal/mol) assessments. Red/blue indicates inflow (gain)/outflow (loss) of electron density. Based on B3LYP+D4//TZP calculations.

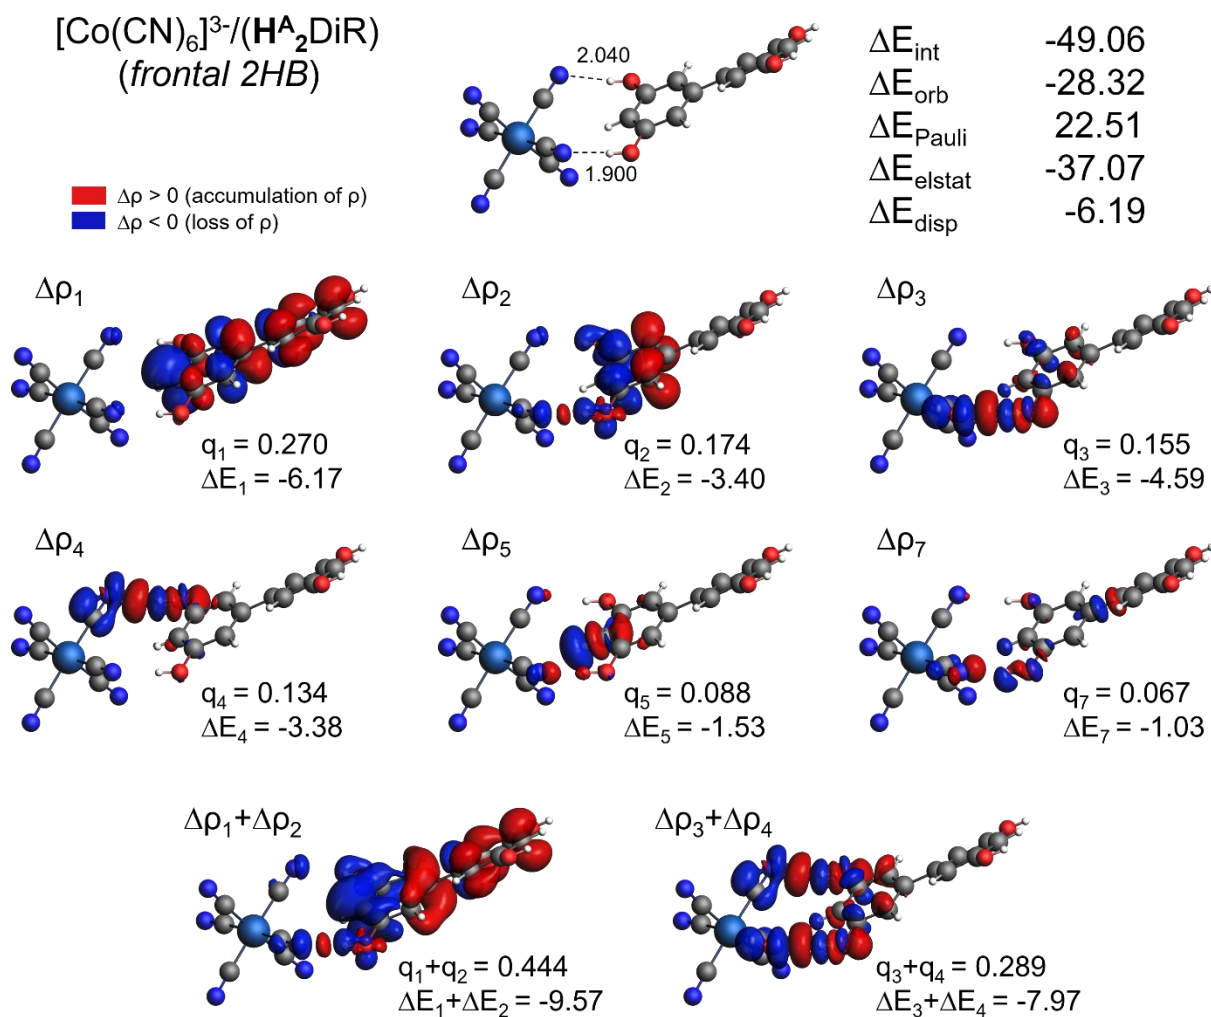

**Figure S16.** ETS-NOCV analysis of the interaction between  $[\text{Co}(\text{CN})_6]^{3-}$  and DiR molecule in the molecular cluster  $\{[\text{Co}(\text{CN})_6]^{3-}; (\text{H}^{\text{A}}_2\text{DiR})\}$  extracted from the crystal structure of **CoDiR**. Top: Molecular cluster  $\{[\text{Co}(\text{CN})_6]^{3-}; (\text{H}^{\text{A}}_2\text{DiR})\}$  with the hydrogen bond distances (in Å) listed.  $[\text{Co}(\text{CN})_6]^{3-}/(\text{H}^{\text{A}}_2\text{DiR})$  energy interaction value and its components (in kcal/mol) according to the ETS energy decomposition scheme. Bottom: Isosurfaces ( $\pm 0.0005$  au) of dominant NOCV contributions to charge deformation (differential) density  $\Delta\rho$  along with their corresponding charge ( $q$  in e) and orbital energy ( $\Delta E$  in kcal/mol) assessments. Red/blue indicates inflow (gain)/outflow (loss) of electron density. Based on B3LYP+D4//TZP calculations.



$[\text{Co}(\text{CN})_6]^{3-}/(\text{H}^{\text{A}}\text{DiR})$   
(frontal 1HB)

■  $\Delta\rho > 0$  (accumulation of  $\rho$ )  
■  $\Delta\rho < 0$  (loss of  $\rho$ )

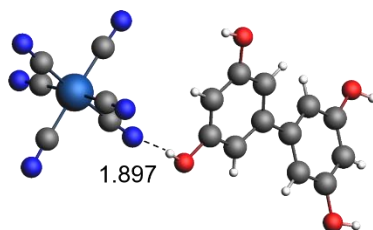

|                            |        |
|----------------------------|--------|
| $\Delta E_{\text{int}}$    | -37.24 |
| $\Delta E_{\text{orb}}$    | -19.87 |
| $\Delta E_{\text{Pauli}}$  | 13.78  |
| $\Delta E_{\text{elstat}}$ | -28.36 |
| $\Delta E_{\text{disp}}$   | -2.80  |

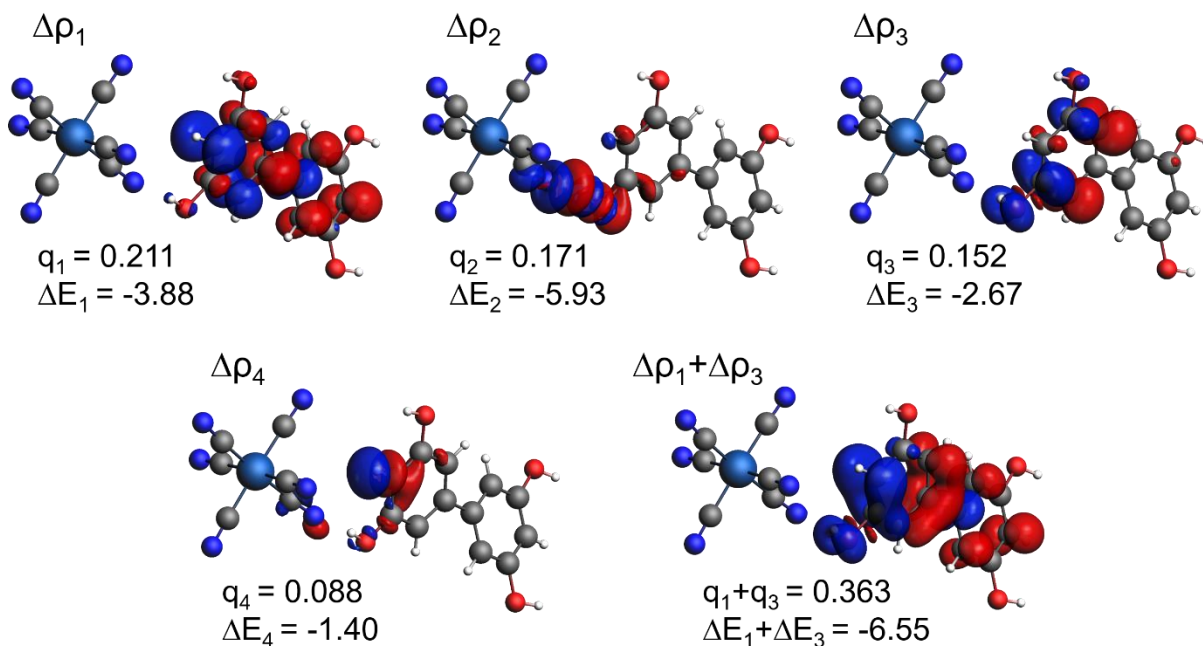

**Figure S17.** ETS-NOCV analysis of the interaction between  $[\text{Co}(\text{CN})_6]^{3-}$  and DiR molecule in the molecular cluster  $\{[\text{Co}(\text{CN})_6]^{3-};(\text{H}^{\text{A}}\text{DiR})\}$  extracted from the crystal structure of **CoDiR**. Top: Molecular cluster  $\{[\text{Co}(\text{CN})_6]^{3-};(\text{H}^{\text{A}}\text{DiR})\}$  with the hydrogen bond distance (in Å) listed.  $[\text{Co}(\text{CN})_6]^{3-}/(\text{H}^{\text{A}}\text{DiR})$  energy interaction value and its components (in kcal/mol) according to the ETS energy decomposition scheme. Bottom: Isosurfaces ( $\pm 0.0005$  au) of dominant NOCV contributions to charge deformation (differential) density  $\Delta\rho$  along with their corresponding charge ( $q$  in e) and orbital energy ( $\Delta E$  in kcal/mol) assessments. Red/blue indicates inflow (gain)/outflow (loss) of electron density. Based on B3LYP+D4//TZP calculations.

(DiR)/(H<sup>A</sup>DiR)  
(frontal 1HB)

■  $\Delta\rho > 0$  (accumulation of  $\rho$ )  
■  $\Delta\rho < 0$  (loss of  $\rho$ )

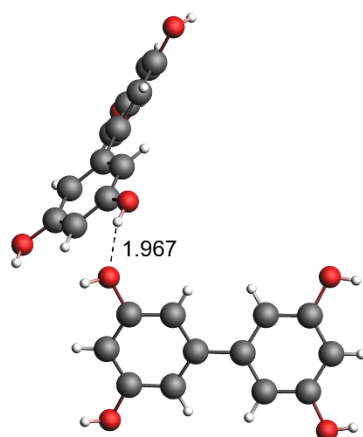

|                            |       |
|----------------------------|-------|
| $\Delta E_{\text{int}}$    | -5.60 |
| $\Delta E_{\text{orb}}$    | -3.18 |
| $\Delta E_{\text{Pauli}}$  | 6.75  |
| $\Delta E_{\text{elstat}}$ | -6.23 |
| $\Delta E_{\text{disp}}$   | -2.94 |

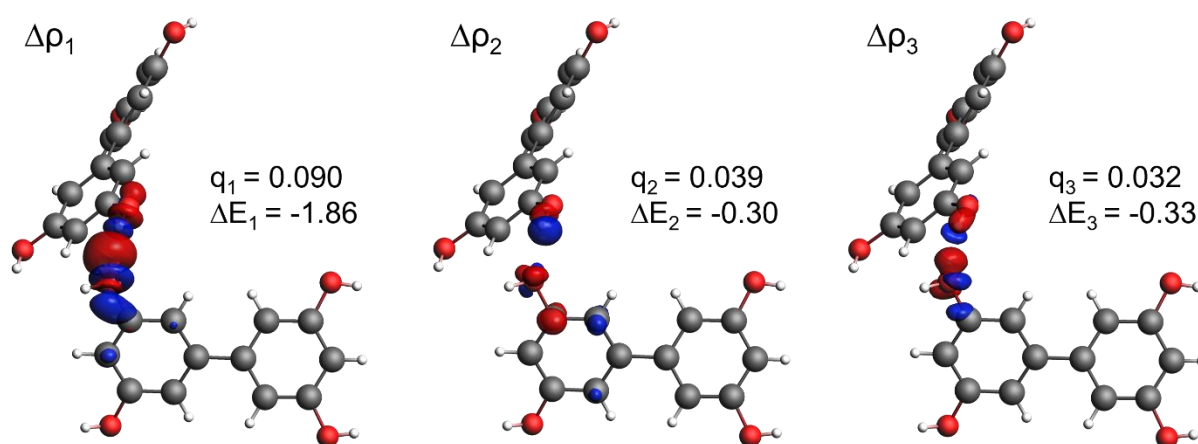

**Figure S18.** ETS-NOCV analysis of the interaction between two DiR molecules in the molecular cluster  $\{(\text{DiR});(\text{H}^{\text{A}}\text{DiR})\}$  extracted from the crystal structure of **CrDiR**. Top: Molecular cluster  $\{(\text{DiR});(\text{H}^{\text{A}}\text{DiR})\}$  with the hydrogen bond distance (in Å) listed. (DiR)/(H<sup>A</sup>DiR) energy interaction value and its components (in kcal/mol) according to the ETS energy decomposition scheme. Bottom: Isosurfaces ( $\pm 0.0005$  au) of dominant NOCV contributions to charge deformation (differential) density  $\Delta\rho$  along with their corresponding charge ( $q$  in e) and orbital energy ( $\Delta E$  in kcal/mol) assessments. Red/blue indicates inflow (gain)/outflow (loss) of electron density. Based on B3LYP+D4/TZP calculations.

**Table S13.** DFT-computed (B3LYP+D4/TZP, BLYP+D4/TZP in parentheses, values obtained with B3LYP+D3/TZVP using Gaussian 16 indicated by the superscript G16) interaction energy values (in kcal/mol) between hexacyanometallate anion  $[\text{M}(\text{CN})_6]^{3-}$  ( $\text{M} = \text{Cr}, \text{Fe}, \text{Co}$ ) and polyresorcinol TriRB molecule(s) in molecular clusters  $\{[\text{M}(\text{CN})_6]^{3-}; (\text{H}^{\text{B}}\text{H}^{\text{C}}\text{TriRB})_2(\text{HTriRB})_2\}$ ,  $\{[\text{M}(\text{CN})_6]^{3-}; (\text{H}^{\text{B}}\text{H}^{\text{C}}\text{TriRB})\}$ , and  $\{[\text{M}(\text{CN})_6]^{3-}; (\text{HTriRB})\}$  extracted from the crystal structures of **MTriRB** with  $\text{M} = \text{Cr}, \text{Fe},$  and  $\text{Co}$ . For clusters visualization, see **Figures S12** and **S13**. 2HB/1HB stands for double/single hydrogen bonding interaction.

|                                                                                     | $[\text{Cr}(\text{CN})_6]^{3-}$            | $[\text{Fe}(\text{CN})_6]^{3-}$  | $[\text{Co}^{01}(\text{CN})_6]^{3-}$  | $[\text{Co}^{02}(\text{CN})_6]^{3-}$  |
|-------------------------------------------------------------------------------------|--------------------------------------------|----------------------------------|---------------------------------------|---------------------------------------|
| $(\text{H}^{\text{B}}\text{H}^{\text{C}}\text{TriRB})_2(\text{HTriRB})_2$           | -148.82<br>(-150.86)                       | -156.65<br>(#)                   | -158.27<br>(†)                        | -157.17<br>(-158.73)                  |
| $(\text{H}^{\text{B}}\text{H}^{\text{C}}\text{TriRB})\text{-I}$<br><i>side 2HB</i>  | -54.54<br>(-57.39)                         | -58.86<br>(#)                    | -60.00<br>(†)                         | -58.63<br>(†)                         |
| $(\text{H}^{\text{B}}\text{H}^{\text{C}}\text{TriRB})\text{-II}$<br><i>side 2HB</i> | -54.90<br>(-57.79)                         | -55.72<br>(#)                    | -57.14<br>(†)                         | -57.84<br>(†)                         |
| $(\text{HTriRB})\text{-I}$<br><i>frontal 1HB</i>                                    | -27.79 / -27.57 <sup>G16</sup><br>(-40.45) | # / -30.36 <sup>G16</sup><br>(#) | -29.87 / -30.01 <sup>G16</sup><br>(†) | -31.32 / -31.39 <sup>G16</sup><br>(†) |
| $(\text{HTriRB})\text{-II}$<br><i>frontal 1HB</i>                                   | -29.46 / -29.30 <sup>G16</sup><br>(-41.87) | # / # <sup>G16</sup><br>(#)      | -30.42 / -30.53 <sup>G16</sup><br>(†) | -28.92 / -29.14 <sup>G16</sup><br>(†) |

† Calculations failed to reach SCF convergence for the motif. # Obtained results were considered unreliable due to significant spin-contamination in the wavefunction of the molecular cluster (expectation value of  $S^2 \sim 0.95\text{-}1.29$  vs. exact 0.75).

**Table S14.** Hydrogen bond acceptor ( $[\text{Co}(\text{CN})_6]^{3-}$ ) / hydrogen bond donor (TriRB) energy interaction values and their components (in kcal/mol) according to the ETS energy decomposition scheme for the molecular clusters  $\{[\text{Co}(\text{CN})_6]^{3-};(\mathbf{H}^{\mathbf{B}}\mathbf{H}^{\mathbf{C}}\text{TriRB})\}$  and  $\{[\text{Co}(\text{CN})_6]^{3-};(\mathbf{H}\text{TriRB})\}$  extracted from the crystal structure of **CoTriRB**. For clusters visualization, see **Figure S12**. Based on B3LYP+D4//TZP calculations. 2HB/1HB stands for double/single hydrogen bonding interaction.

| Molecular cluster                                                                                                            | $\Delta E_{\text{int}}$ | $\Delta E_{\text{orb}}$ | $\Delta E_{\text{Pauli}}$ | $\Delta E_{\text{elstat}}$ | $\Delta E_{\text{disp}}$ |
|------------------------------------------------------------------------------------------------------------------------------|-------------------------|-------------------------|---------------------------|----------------------------|--------------------------|
| $\{[\text{Co}^{01}(\text{CN})_6]^{3-};(\mathbf{H}^{\mathbf{B}}\mathbf{H}^{\mathbf{C}}\text{TriRB})\}$ -I<br><i>side 2HB</i>  | -60.00                  | -38.59                  | 33.09                     | -48.88                     | -5.62                    |
| $\{[\text{Co}^{01}(\text{CN})_6]^{3-};(\mathbf{H}^{\mathbf{B}}\mathbf{H}^{\mathbf{C}}\text{TriRB})\}$ -II<br><i>side 2HB</i> | -57.14                  | -35.61                  | 28.08                     | -44.56                     | -5.06                    |
| $\{[\text{Co}^{01}(\text{CN})_6]^{3-};(\mathbf{H}\text{TriRB})\}$ -I<br><i>frontal 1HB</i>                                   | -29.87                  | -21.63                  | 15.87                     | -21.20                     | -2.92                    |
| $\{[\text{Co}^{01}(\text{CN})_6]^{3-};(\mathbf{H}\text{TriRB})\}$ -II<br><i>frontal 1HB</i>                                  | -30.42                  | -19.81                  | 12.14                     | -20.04                     | -2.71                    |
| $\{[\text{Co}^{02}(\text{CN})_6]^{3-};(\mathbf{H}^{\mathbf{B}}\mathbf{H}^{\mathbf{C}}\text{TriRB})\}$ -I<br><i>side 2HB</i>  | -58.63                  | -40.67                  | 39.06                     | -51.19                     | -5.84                    |
| $\{[\text{Co}^{02}(\text{CN})_6]^{3-};(\mathbf{H}^{\mathbf{B}}\mathbf{H}^{\mathbf{C}}\text{TriRB})\}$ -II<br><i>side 2HB</i> | -57.84                  | -36.06                  | 28.27                     | -44.89                     | -5.15                    |
| $\{[\text{Co}^{02}(\text{CN})_6]^{3-};(\mathbf{H}\text{TriRB})\}$ -I<br><i>frontal 1HB</i>                                   | -31.32                  | -21.60                  | 15.61                     | -22.55                     | -2.78                    |
| $\{[\text{Co}^{02}(\text{CN})_6]^{3-};(\mathbf{H}\text{TriRB})\}$ -II<br><i>frontal 1HB</i>                                  | -28.92                  | -19.91                  | 13.25                     | -19.37                     | -2.88                    |

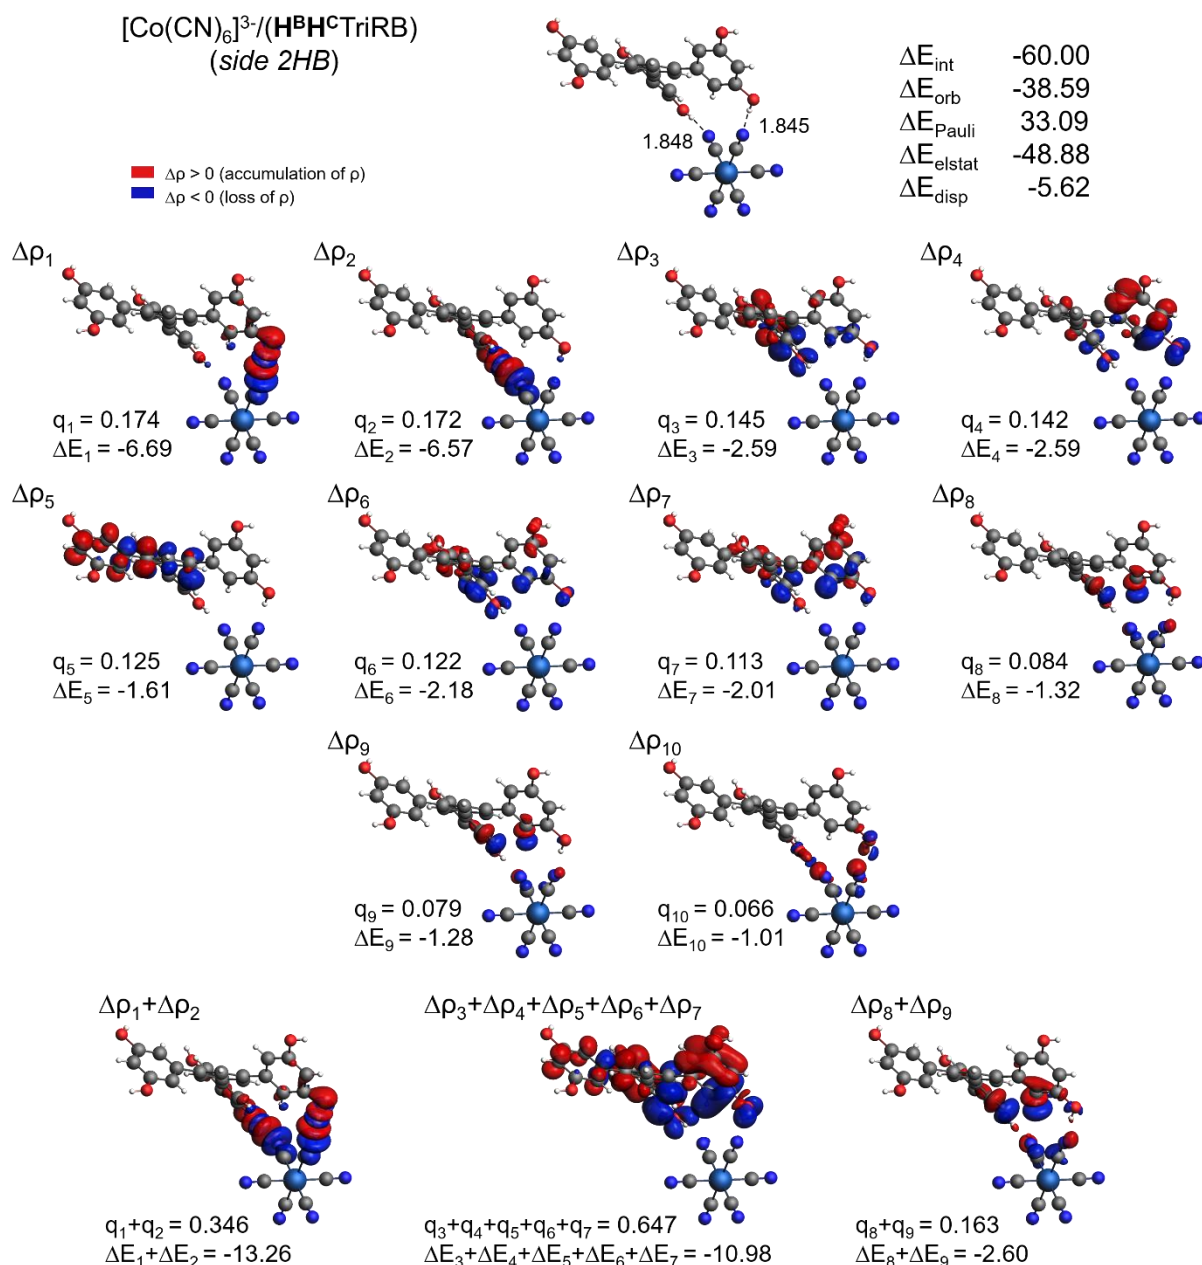

**Figure S19.** ETS-NOCV analysis of the interaction between  $[\text{Co}(\text{CN})_6]^{3-}$  and TriRB molecule in the molecular cluster  $\{[\text{Co}^{\text{O}1}(\text{CN})_6]^{3-}; (\text{H}^{\text{B}}\text{H}^{\text{C}}\text{TriRB})\}$ -I extracted from the crystal structure of **CoTriRB**. Top: Molecular cluster  $\{[\text{Co}^{\text{O}1}(\text{CN})_6]^{3-}; (\text{H}^{\text{B}}\text{H}^{\text{C}}\text{TriRB})\}$ -I with the hydrogen bond distances (in Å) listed.  $[\text{Co}(\text{CN})_6]^{3-}/(\text{H}^{\text{B}}\text{H}^{\text{C}}\text{TriRB})$  energy interaction value and its components (in kcal/mol) according to the ETS energy decomposition scheme. Bottom: Isosurfaces ( $\pm 0.0005$  au) of dominant NOCV contributions to charge deformation (differential) density  $\Delta\rho$  along with their corresponding charge ( $q$  in e) and orbital energy ( $\Delta E$  in kcal/mol) assessments. Red/blue indicates inflow (gain)/outflow (loss) of electron density. Based on B3LYP+D4//TZP calculations.

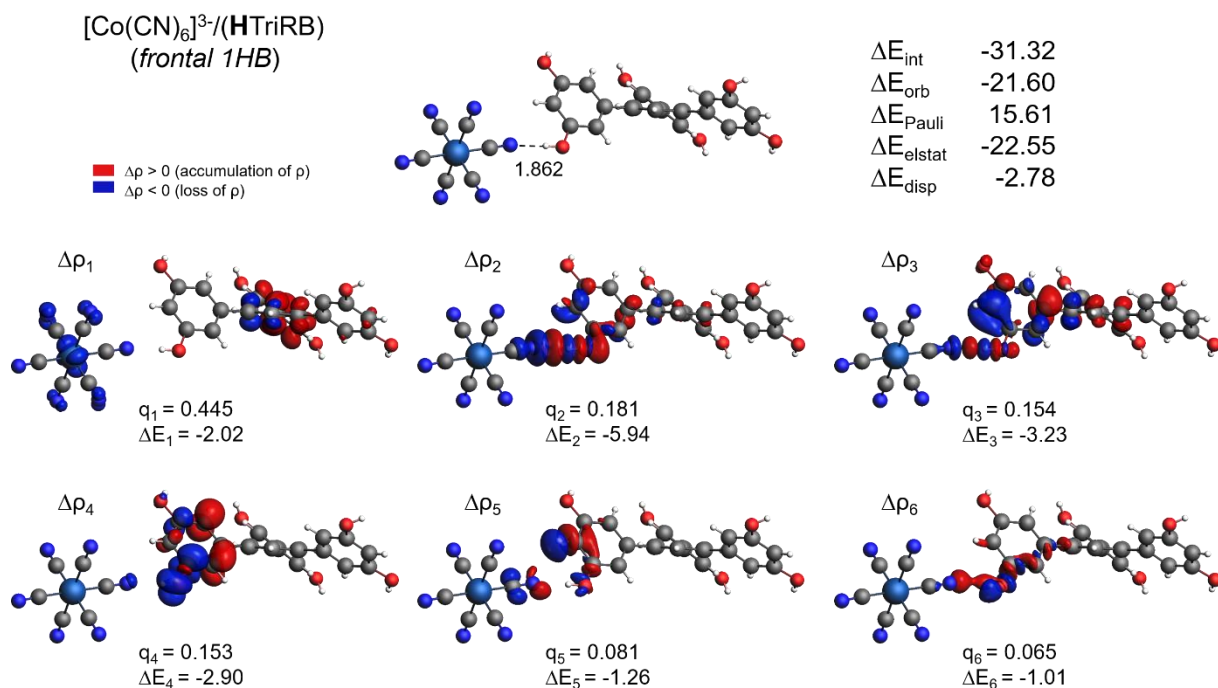

**Figure S20.** ETS-NOCV analysis of the interaction between  $[\text{Co}(\text{CN})_6]^{3-}$  and TriRB molecule in the molecular cluster  $\{[\text{Co}^{02}(\text{CN})_6]^{3-};(\text{HTriRB})\}$ -I extracted from the crystal structure of **CoTriRB**. Top: Molecular cluster  $\{[\text{Co}^{02}(\text{CN})_6]^{3-};(\text{HTriRB})\}$ -I with the hydrogen bond distance (in Å) listed.  $[\text{Co}(\text{CN})_6]^{3-}/(\text{HTriRB})$  energy interaction value and its components (in kcal/mol) according to the ETS energy decomposition scheme. Bottom: Isosurfaces ( $\pm 0.0005$  au) of dominant NOCV contributions to charge deformation (differential) density  $\Delta\rho$  along with their corresponding charge ( $q$  in e) and orbital energy ( $\Delta E$  in kcal/mol) assessments. Red/blue indicates inflow (gain)/outflow (loss) of electron density. Based on B3LYP+D4//TZP calculations.

### 3. Details of spectroscopic characterization

#### 3.1. Vibrational studies

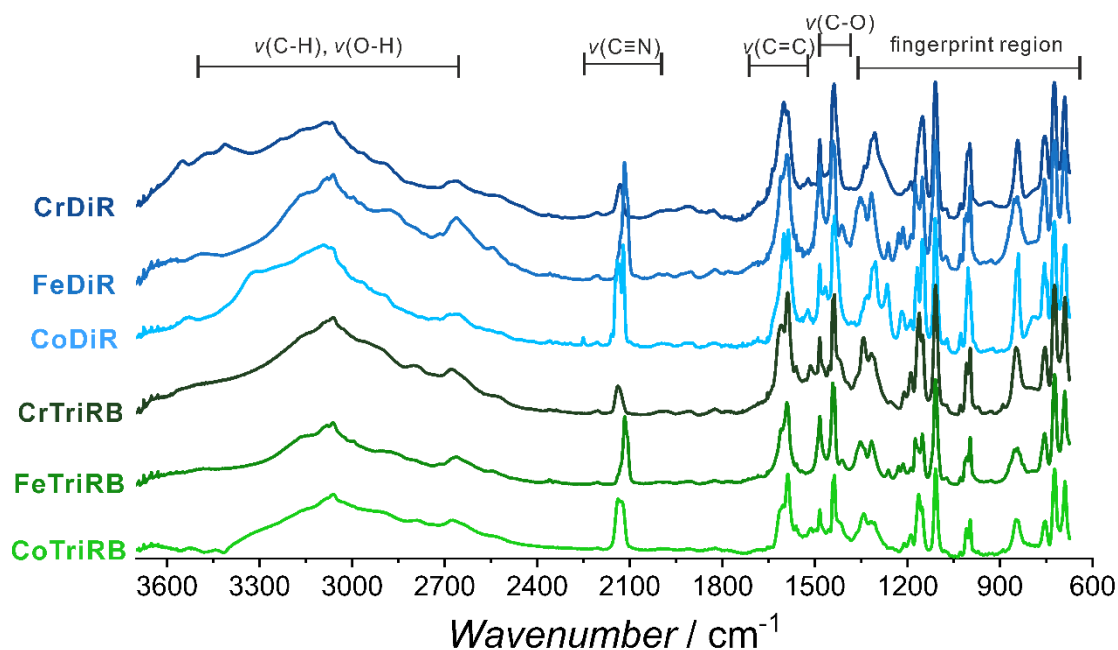

**Figure S21.** Room-temperature IR spectra for the single crystals of **CrDiR**, **FeDiR**, **CoDiR**, **CrTriRB**, **FeTriRB**, and **CoTriRB** measured in a wide range.

#### 3.2. Room-temperature Raman scattering spectroscopy

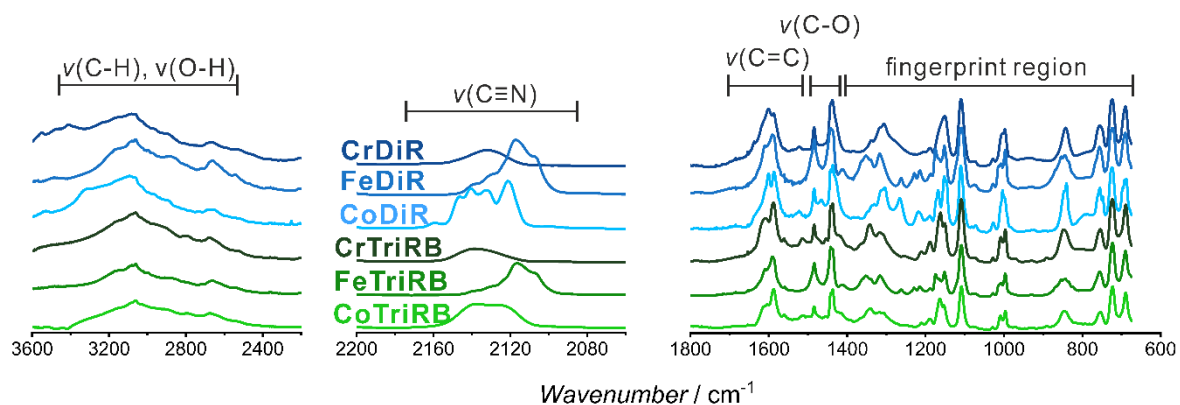

**Figure S22.** Infrared spectra of **MDiR** and **MTriRB** in the absorption mode, including the regions characteristic of the  $\nu(\text{O-H})$  and  $\nu(\text{C}\equiv\text{N})$  vibrations, and the skeletal vibrations in the fingerprint region.

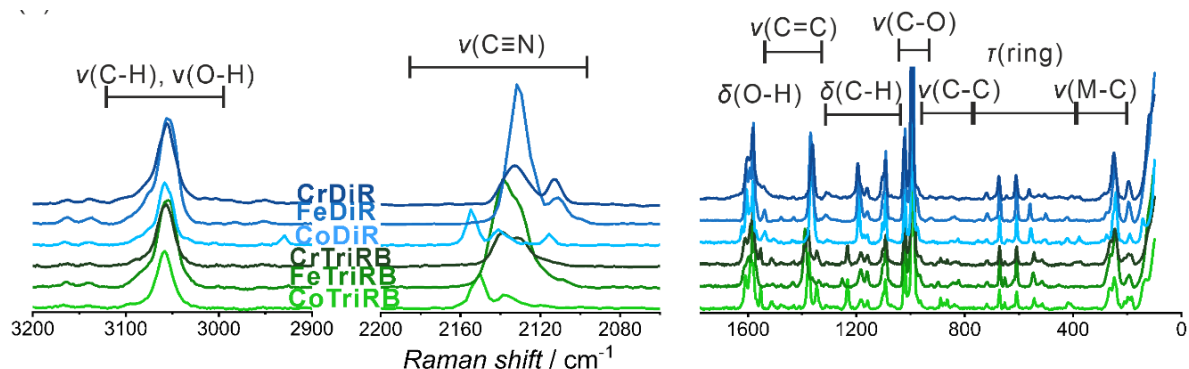

Figure S23. Room-temperature Raman scattering spectra for the single crystals of **MDiR** and **MTriRB** measured in a wide range.

IR and Raman spectra contain bands corresponding to molecular components and intermolecular synthons indicated by SC XRD analysis:  $\nu(\text{O-H})$  vibrations of DiR and TriRB;  $\nu(\text{C-H})$  vibrations of DiR, TriRB,  $\text{PPh}_4^+$ , MeOH, and MeCN;  $\nu(\text{C}\equiv\text{N})$  vibrations of  $[\text{M}(\text{CN})_6]^{3-}$  and MeCN, and a whole set of skeletal vibrations of DiR, TriRB, and  $\text{PPh}_4^+$  (see Figures 21-23). The IR spectra of all the cocrystal salts exhibit a broad complex band within the  $3600\text{-}2500\text{ cm}^{-1}$  range. This band is attributed to the vibrations of  $\nu(\text{O-H})$  within the extended charge-assisted hydrogen bond network as well as the vibrations of  $\nu(\text{C-H})$ . The maximum intensity in this region is severely shifted towards *ca.*  $3060\text{ cm}^{-1}$ , from *ca.*  $3280\text{ cm}^{-1}$  observed in the spectra of both cofomers in the native form. The following IR-active  $\nu(\text{C}\equiv\text{N})$  vibrations:  $2132\text{ cm}^{-1}$  for **CrDiR**;  $2138\text{ cm}^{-1}$  for **CrTriRB**;  $2139, 2131, 2117,$  and  $2107\text{ cm}^{-1}$  for **FeDiR**;  $2139, 2131, 2116,$  and  $2106\text{ cm}^{-1}$  for **FeTriRB**;  $2159, 2146, 2132$  and  $2121\text{ cm}^{-1}$  for **CoDiR**;  $2138$  and  $2124\text{ cm}^{-1}$  for **CoTriRB** are about  $20\text{ cm}^{-1}$  shifted to a higher wavenumber compared to the respective precursors  $(\text{PPh}_4)_3[\text{M}(\text{CN})_6]$ .<sup>S2</sup> The same effect is visible in the corresponding Raman spectra involving the following peak groups:  $2133, 2123$  and  $2113\text{ cm}^{-1}$  for **CrDiR**;  $2139, 2129$  and  $2121\text{ cm}^{-1}$  for **CrTriRB**;  $2131, 2122,$  and  $2112\text{ cm}^{-1}$  for **FeDiR**;  $2139, 2129,$  and  $2123\text{ cm}^{-1}$  for **FeTriRB**;  $2154, 2140,$  and  $2116\text{ cm}^{-1}$  for **CoDiR**;  $2151, 2137,$  and  $2119\text{ cm}^{-1}$  for **CoTriRB** (Figures S23). As for the skeletal cofomer IR-active vibrations, the only extractable (e.g. free from the contributions of other components) essential spectral shifts of *ca.*  $20\text{ cm}^{-1}$  (**DiR** line) or  $30\text{ cm}^{-1}$  (**TriRB** line) compared to the solid specimens of cofomers might be claimed in the region of  $800\text{-}870\text{ cm}^{-1}$ , assignable to the composed  $\gamma(\text{C-H})$  type vibrations.<sup>S19</sup> In the Raman spectra, the reasonably extractable spectral changes occur in the  $1590\text{-}1640\text{ cm}^{-1}$  range of  $\nu(\text{C}=\text{C})$  and  $\delta(\text{O-H}\cdots\text{D})$  vibrations and in the  $1250\text{-}1190\text{ cm}^{-1}$  range of  $\beta(\text{C-H})$  and  $\delta(\text{O-H}\cdots\text{D})$  vibrations,<sup>S20</sup> D – hydrogen bond donor atom. All the observed modifications with respect to the reference solids are attributable to the specific hydrogen-bond networks involving  $[\text{M}(\text{CN})_6]^{3-}$  and cofomers established in **MDiR** and **MTriRB** irrespective of the space group observed in both groups of compounds.



### 3.3. Low-frequency (LF) Raman scattering spectroscopy

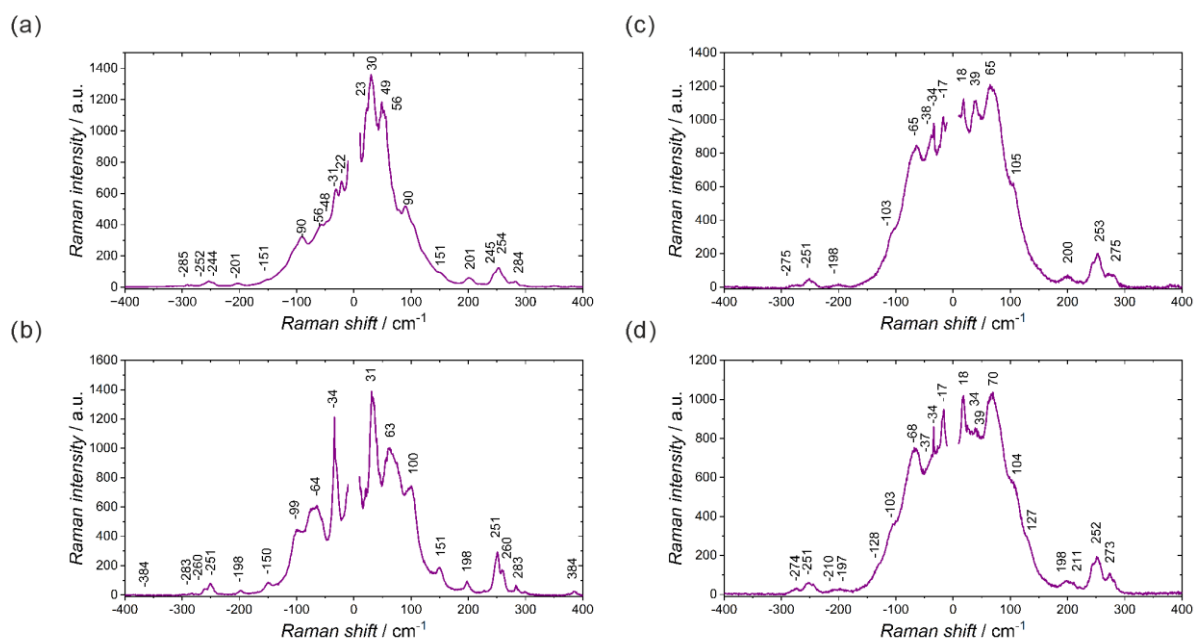

Figure S24. Room-temperature LF-Raman scattering spectra for the single crystals of **CrDiR** (a), **CoDiR** (b), **CrTriRB** (c), and **FeTriRB** (d). The numbers above the peaks correspond to the position of the peaks in cm<sup>-1</sup>.

### 3.4. <sup>57</sup>Fe Mössbauer spectra

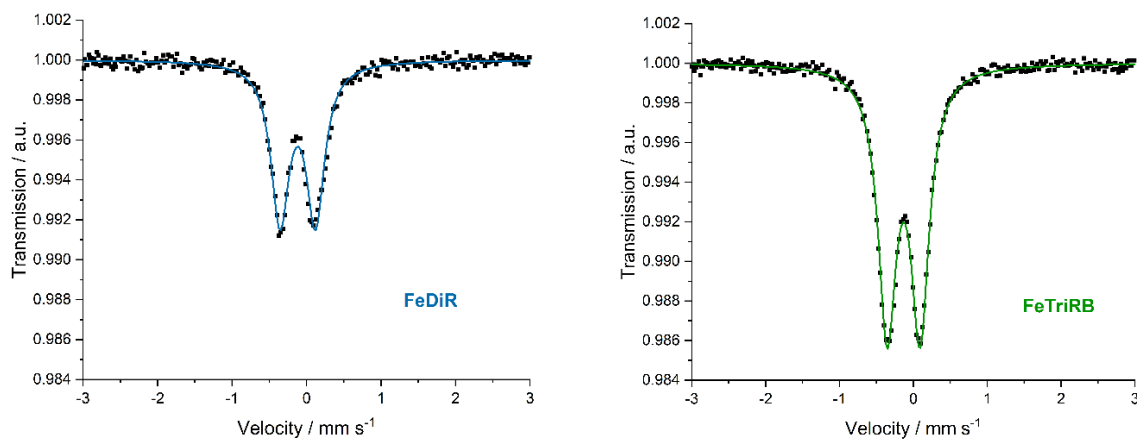

Figure S25. <sup>57</sup>Fe Mössbauer spectra of **FeDiR** (left) and of **FeTriRB** (right). The values of the fitted parameters  $\delta = -0.12(1)$  mm s<sup>-1</sup>, QS = 0.48(1) mm s<sup>-1</sup> for **FeDiR**, and  $\delta = -0.13(1)$  mm s<sup>-1</sup>, QS = 0.45(1) mm s<sup>-1</sup> for **FeTriRB**, are very close to the parameters sets obtained previously for **FeH<sub>3</sub>PG**, -0.11 and 0.55 mm s<sup>-1</sup>, in line with the presence of  $_{\text{L}}\text{O-H}\cdots\text{N}_{\text{M-C}\equiv\text{N}}$  hydrogen bonds.<sup>S2</sup>

### 3.5. UV-Vis electronic absorption spectra

UV-Vis spectra of cocrystal salts **MDiR** and **MTriRB** in the solid state, together with the spectra of the reference solids of the pristine cofomers and metal complexes in the form of the Kubelka-Munk function, are presented in Figure S26. The spectra show diverse absorption threshold points depending on the  $[\text{M}(\text{CN})_6]^{3-}$  used, and remain in line with the results presented previously for the  $\{\text{M}(\text{CN})_6\}^{3-};\text{H}_3\text{PG}\}$  networks.<sup>S2</sup> The lowest-energy absorption bands for the Cr(III) containing compounds, centered around 379, 375, and 373 nm for **CrTriRB**, **CrDiR**, and  $\text{K}_3[\text{Cr}(\text{CN})_6]_3$  salt, respectively, correspond to the lowest-energy spin-allowed  ${}^4\text{T}_{2g} \leftarrow {}^4\text{A}_{2g}$  transition for  $\text{Cr}^{3+}$  ions in the octahedral ligand field. The corresponding lowest-energy observed bands of  $[\text{Co}(\text{CN})_6]^{3-}$  moieties, spin-allowed  ${}^1\text{T}_{1g} \leftarrow {}^1\text{A}_{1g}$  transitions with the maxima expected below 320 nm, are on the other hand hidden under the far more intense intra-ligand (IL) transitions and the CT transitions dominating in the UV-region. The Fe(III) based networks exhibit intense absorption bands with maxima at *ca.* 411 and 427 nm (**FeDiR**), *ca.* 410 and 430 nm (**FeTriRB**), and *ca.* 403 and 422 nm ( $\text{K}_3[\text{Fe}(\text{CN})_6]_3$ ), all assigned to the ligand-to-metal charge-transfer (LMCT)  $\sigma(\text{CN}^-) \rightarrow \pi(\text{t}_{2g})$  transitions (Figure 5, Figure S26).

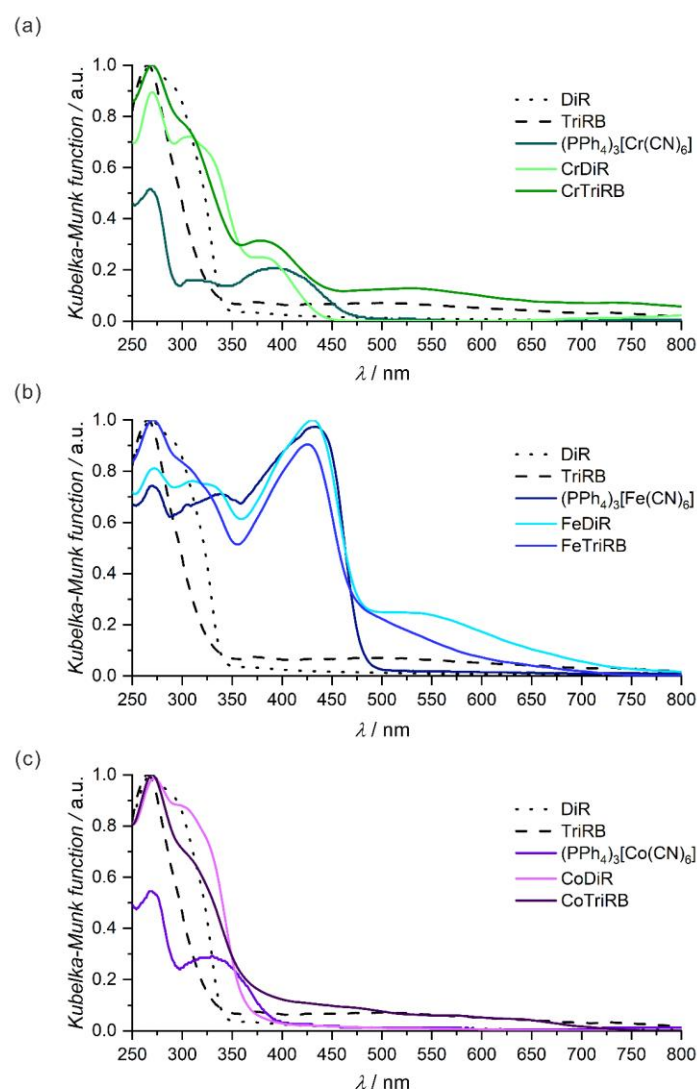

**Figure S26.** Solid-state UV-Vis absorption spectra of the **MDiR** and **MTriRB** compounds in the range of 250-800 nm together with those of DiR, TriRB and  $\text{PPh}_4[\text{M}(\text{CN})_6] \cdot n\text{H}_2\text{O}$  precursors as the references; M = Cr (a), Fe (b), and Co (c).

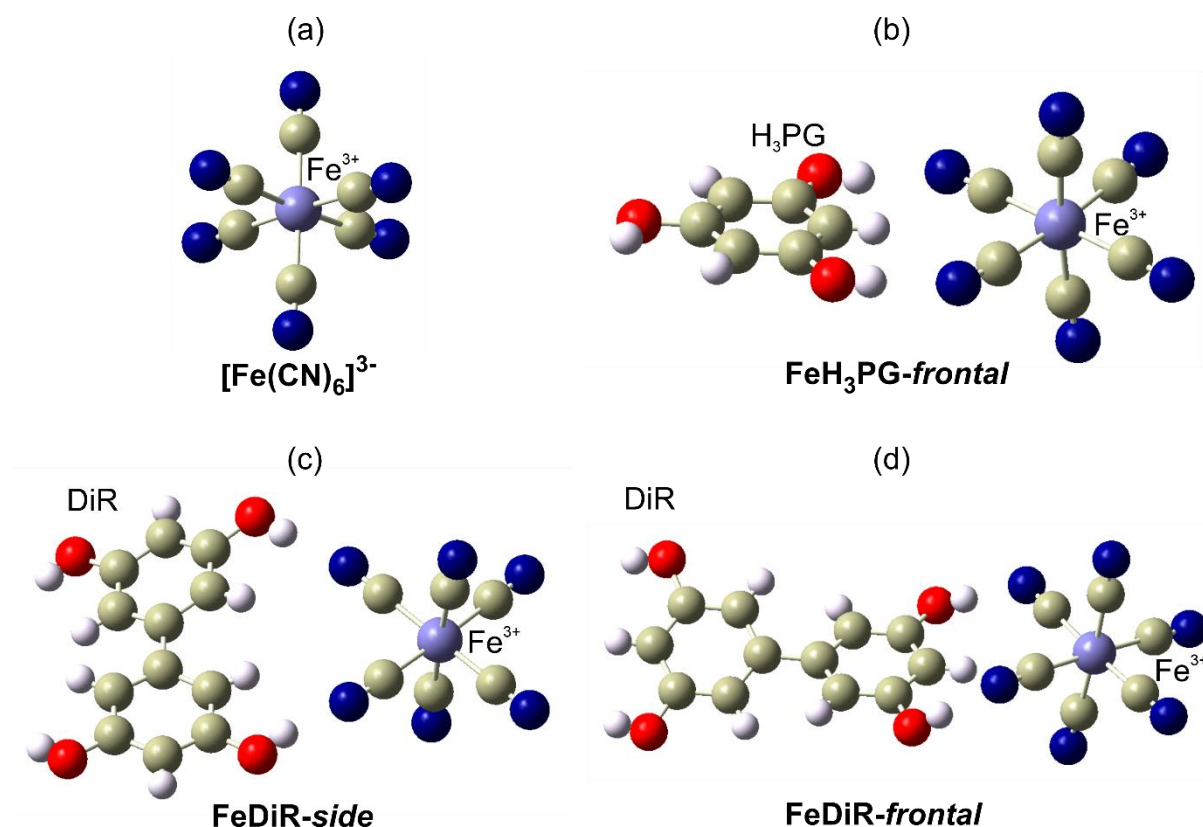

**Figure S27.** Molecular models used in calculations of UV-Vis electronic spectra representative of  $[\text{Fe}(\text{CN})_6]^{3-}$  references (a), **FeH<sub>3</sub>PG** (b), and **FeDiR** (c, d).

Quantum-chemical calculations of the UV-Vis absorption spectra for the models presented in **Figure S27** were done using the Gaussian 16 software.<sup>S12</sup> The models were prepared based on the respective crystal structures by removing the solvent, counterion, and appropriate organic ligand molecules, to form the pristine  $\text{Fe}(\text{CN})_6^{3-}$  model, **FeH<sub>3</sub>PG-frontal** model representative of the hydrogen-bonded contacts observed in the crystal structure of **FeH<sub>3</sub>PG**,<sup>S2</sup> and two – **FeDiR-side** and **FeDiR-frontal** – models representative of the hydrogen-bonded contacts observed in the crystal structure of **FeDiR** (**Figure S27**). The single-point DFT and TD-DFT calculations were performed with the PBE density functional,<sup>S21</sup> using the Karlsruhe type def2-TZVP basis set for Fe, C, N, and H atoms.<sup>S15,S16</sup> Vertical excitation energies from the ground state to the lowest 300 electronic excited states were calculated along with the corresponding oscillator strengths for respective electronic transitions. The simulated spectra shown were obtained using the GaussView 6.1.1 program<sup>S22</sup> using Gaussian-broadening with the implemented UV-Vis peak half-width at half height parameter of 0.333 eV. For the assignment of the selected key transitions, see **Figures S28-S31**. As the ground-state energy calculations for the corresponding molecular model of **FeTriRB-side** (representative of the hydrogen-bonded contacts observed in the crystal structure of **FeTriRB**) failed to reach SCF convergence at the DFT-PBE level of theory, we were not able to simulate its UV-Vis spectrum using the above protocol. However, based on the results shown in **Figure 5** (main text) and **Figures S28-S31**, we believe that we might infer similar spectral properties for this system to those for **FeDiR**.

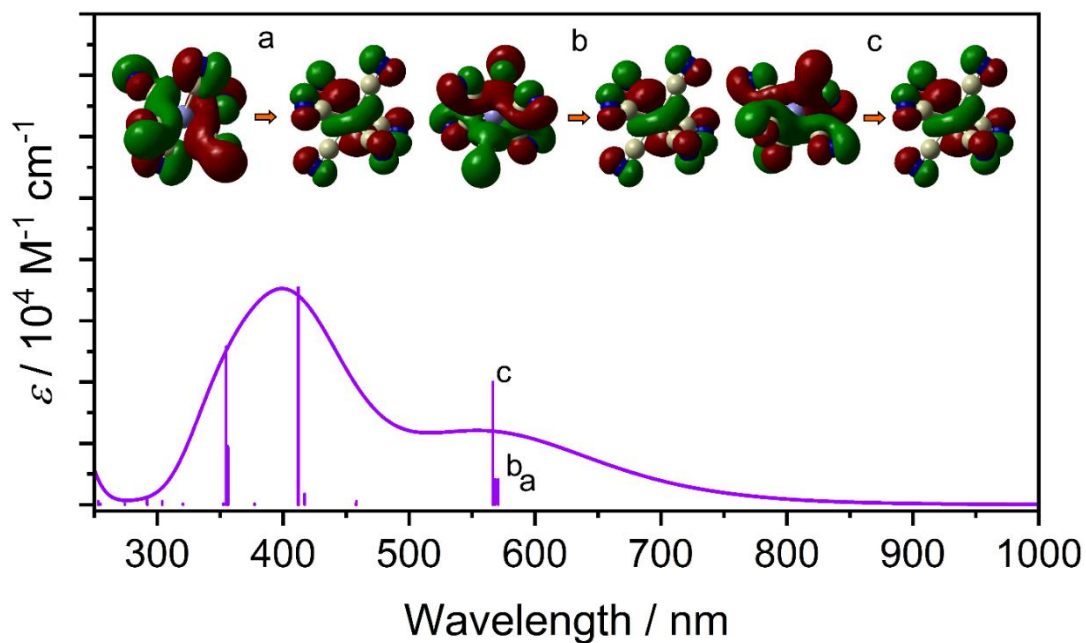

**Figure S28.** Simulated UV-Vis spectrum for the pristine  $[\text{Fe}(\text{CN})_6]^{3-}$  model. The bars indicate the energies and oscillator strengths for the electronic excitations computed in the presented spectral region. The analysed excitations a-c are assigned as intramolecular LMCT<sup>2</sup> transitions in  $[\text{Fe}(\text{CN})_6]^{3-}$ , judging by the isosurfaces of the involved molecular orbitals.

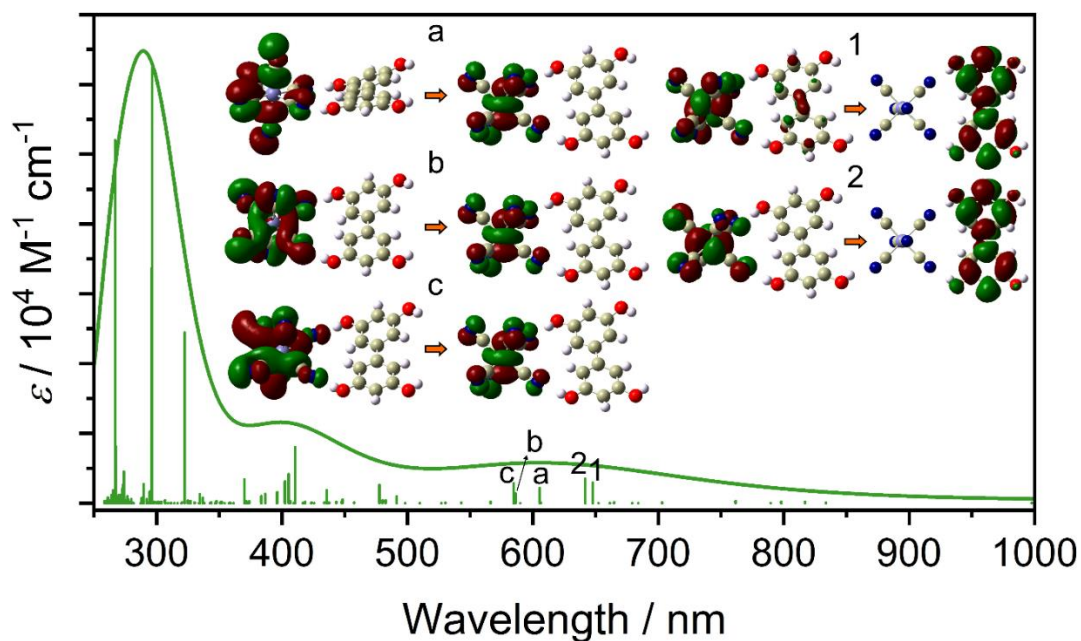

**Figure S29.** Simulated UV-Vis spectrum for the FeDiR-*side* model. The bars indicate the energies and oscillator strengths for the electronic excitations computed in the presented spectral region. The analysed excitations a-c are assigned as intramolecular LMCT<sup>2</sup> transitions in  $[\text{Fe}(\text{CN})_6]^{3-}$ , whereas the excitations 1 and 2 correspond to intermolecular OSCT  $[\text{Fe}(\text{CN})_6]^{3-} \rightarrow \text{DiR}$  transitions, judging by the isosurfaces of the involved molecular orbitals. Note that the OSCT transitions are of lower energy compared to the LMCT transitions.

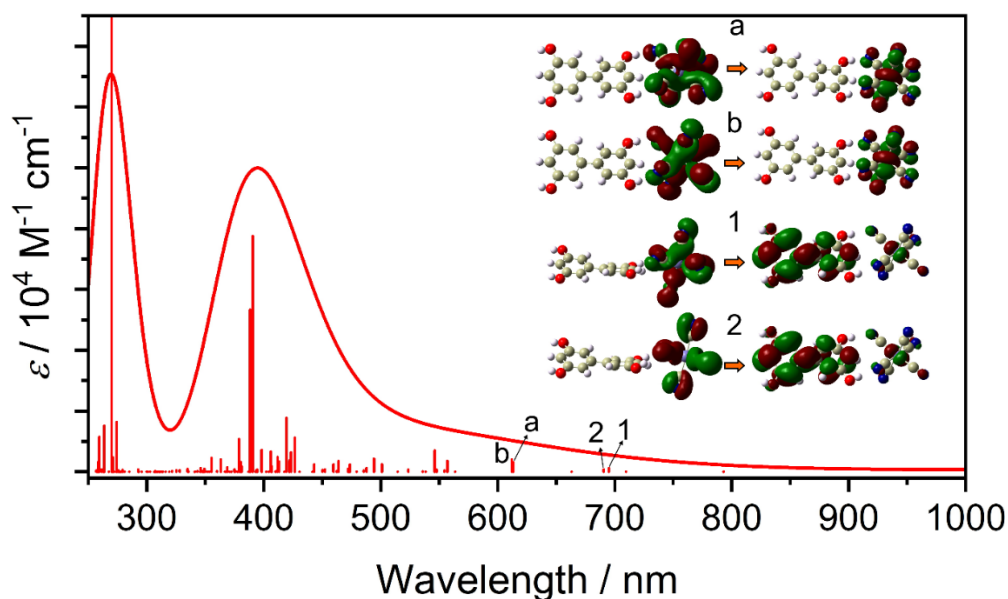

**Figure S30.** Simulated UV-Vis spectrum for the FeDiR-*frontal* model. The bars indicate the energies and oscillator strengths for the electronic excitations computed in the presented spectral region. The analysed excitations a and b are assigned as intramolecular LMCT<sup>2</sup> transitions in [Fe(CN)<sub>6</sub>]<sup>3-</sup>, whereas the excitations 1 and 2 correspond to intermolecular OSCT [Fe(CN)<sub>6</sub>]<sup>3-</sup> → DiR transitions, judging by the isosurfaces of the involved molecular orbitals. Note that the OSCT transitions are of lower energy compared to the LMCT transitions.

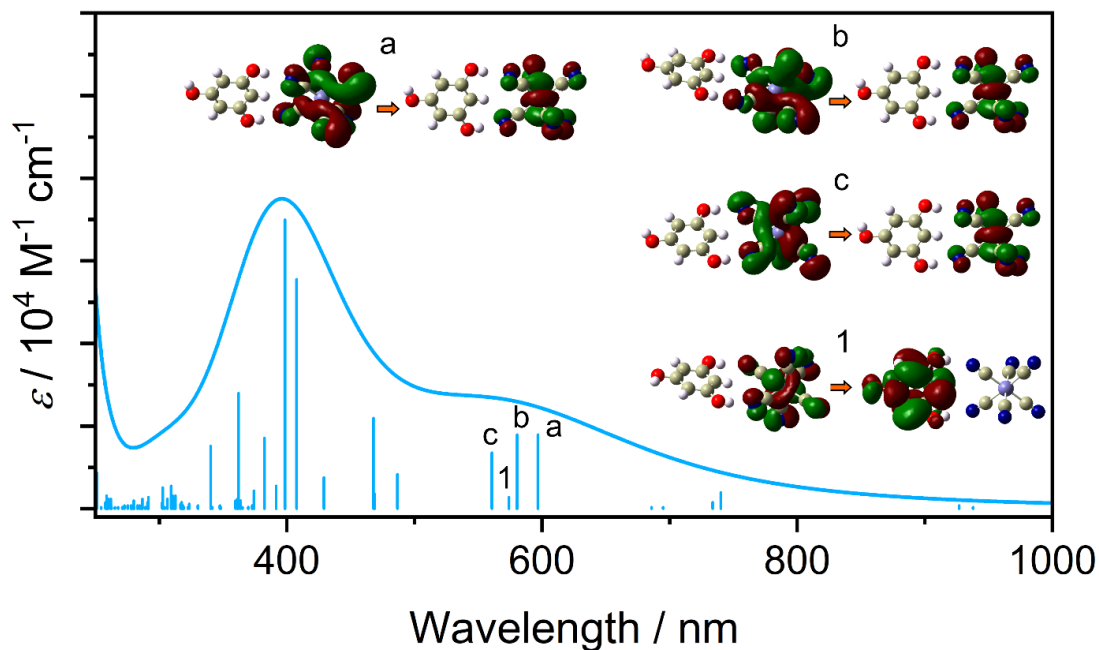

**Figure S31.** Simulated UV-Vis spectrum for the FeH<sub>3</sub>PG-*frontal* model. The bars indicate the energies and oscillator strengths for the electronic excitations computed in the presented spectral region. The analysed excitations a-c are assigned as intramolecular LMCT<sup>2</sup> transitions in [Fe(CN)<sub>6</sub>]<sup>3-</sup>, whereas the excitation 1 corresponds to intermolecular OSCT [Fe(CN)<sub>6</sub>]<sup>3-</sup> → H<sub>3</sub>PG transition, judging by the isosurfaces of the involved molecular orbitals. Note that in this case the OSCT transition is of comparable energy to the LMCT transitions, unlike in the case of FeDiR-*side* and FeDiR-*frontal*.

#### 4.6. Second-harmonic generation studies

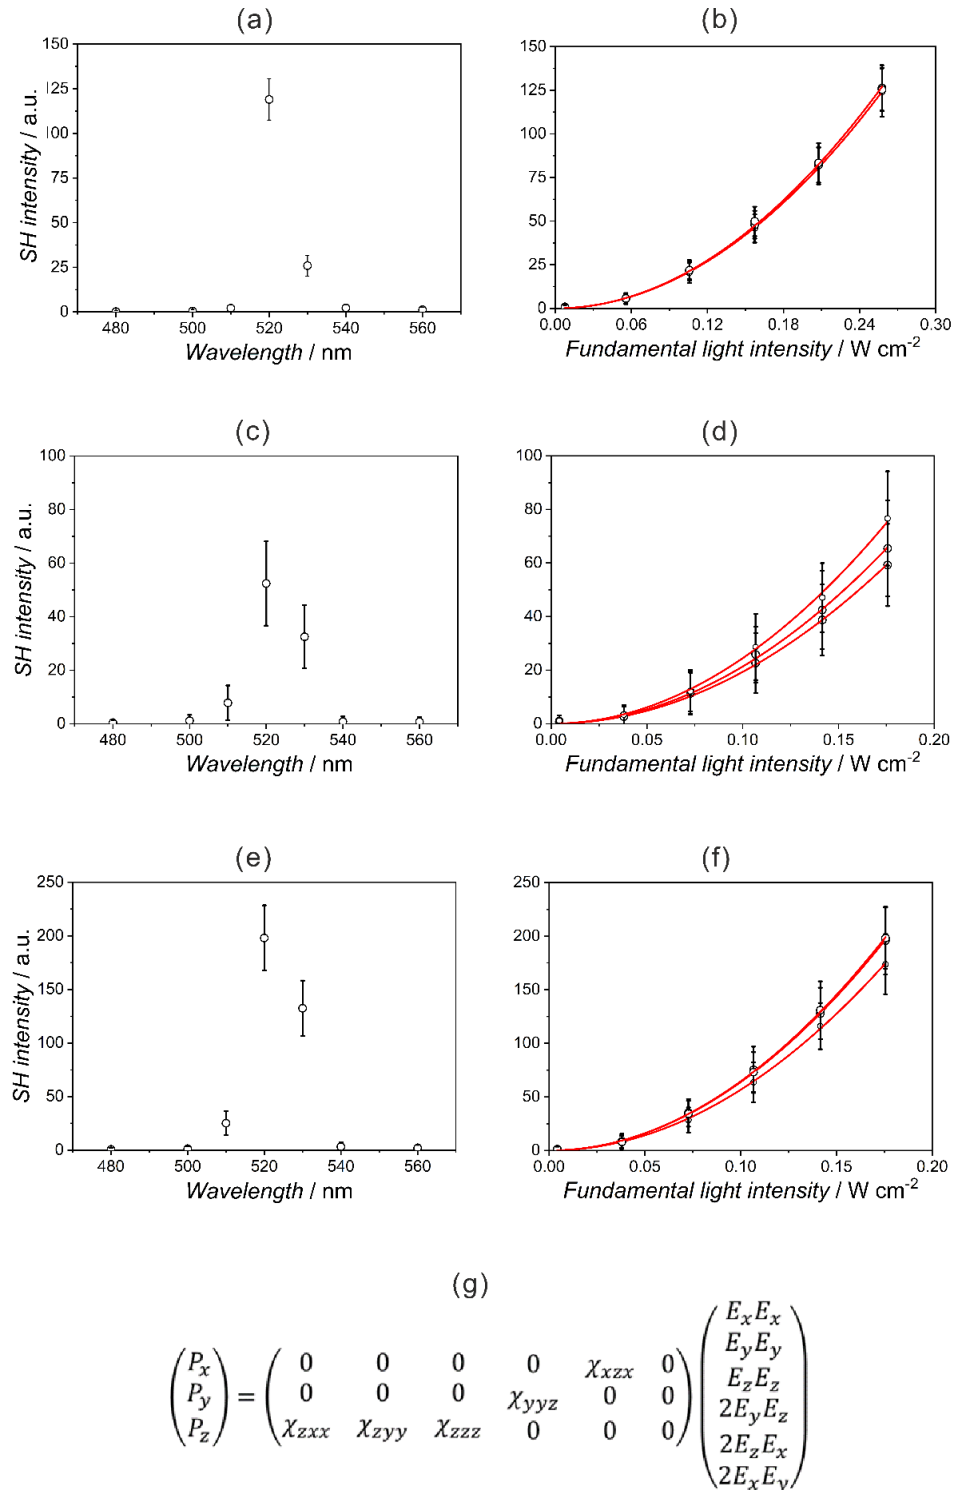

**Figure S32.** Second-harmonic signals for **CrDiR** (a), (b), (g), **FeDiR** (c), (d), (g), and **CoDiR** (e), (f), (g). SHG plotted against wavelength to confirm the chromaticity aberration of the SH signal of **CrDiR** (a), **FeDiR** (c), and **CoDiR** (e). Average SHG signals of **CrDiR** (b), **FeDiR** (d), and **CoDiR** (f); red solid lines correspond to the results of fitting using a quadratic function ( $y = Ax^2$ ). Relation between tensor elements of the SH susceptibility corresponding to space group  $Pna2_1$  and SH polarization (g).

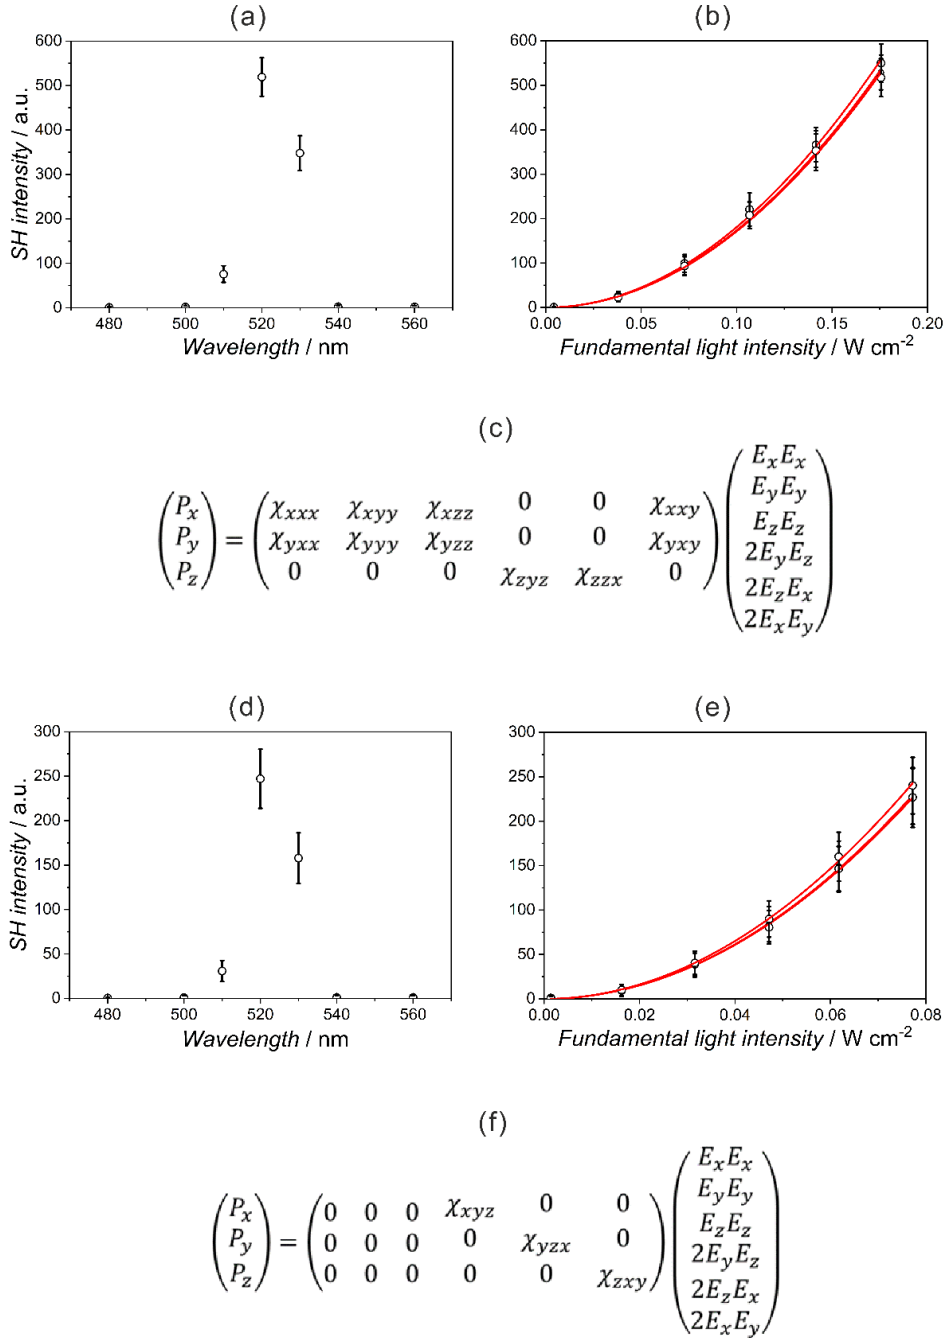

**Figure S33.** Second-harmonic signals for **CrTriRB** (a), (b), (c), and **FeTriRB** (d), (e), (f). SHG plotted against wavelength to confirm the chromaticity aberration of the SH signal of **CrTriRB** (a) and **FeTriRB** (d). Average SHG signals of **CrTriRB** (b) and **FeTriRB** (e); red solid lines correspond to the results of fitting using a quadratic function ( $y = Ax^2$ ). Relation between tensor elements of the SH susceptibility corresponding to space group  $Cc$  and  $P2_12_12$  and SH polarization, respectively, (c) and (f).

**Table S15.** Room-temperature second-harmonic susceptibilities for powdered samples of **MDiR** and **MTriRB**, the KDP standard, and other reference assemblies.

| Compound                                             | Topology                             | Space group  | SH susceptibility (esu) (% KDP)  | Reference |
|------------------------------------------------------|--------------------------------------|--------------|----------------------------------|-----------|
| <b>CrDiR</b>                                         | Ionic:<br>cocrystal salt<br>solvates | $Pna2_1$     | $6.0 \times 10^{-12}$<br>(0.5%)  | This work |
| <b>FeDiR</b>                                         |                                      | $Pna2_1$     | $7.2 \times 10^{-12}$<br>(0.6%)  | This work |
| <b>CoDiR</b>                                         |                                      | $Pna2_1$     | $2.2 \times 10^{-11}$<br>(1.8%)  | This work |
| <b>CrTriRB</b>                                       |                                      | $Cc$         | $6.2 \times 10^{-11}$<br>(5.2%)  | This work |
| <b>FeTriRB</b>                                       |                                      | $P2_12_12$   | $3.2 \times 10^{-11}$<br>(2.7%)  | This work |
| <b>CoTriRB</b>                                       |                                      | $P2_1$       | $1.4 \times 10^{-10}$<br>(11.7%) | This work |
| $KH_2PO_4$ (KDP)                                     | Ionic salt                           | $P2_1$       | $1.2 \times 10^{-9}$<br>(100%)   | S23       |
| $[Dy(phen)_2(NO_3)(H_2O)][Fe(CN)_5(NO)] \cdot 3H_2O$ | 1D                                   | $Pna2_1$     | $3.5 \times 10^{-10}$ (30%)      | S24       |
| $\{[Cu(NH_3)_2]_2[Mo(CN)_8]\}$                       | 3D                                   | $Fdd2$       | $1.8 \times 10^{-10}$ (15%)      | S25       |
| $\{[Gd(dmf)_6][Mo(CN)_5(NO)]\}$                      | 1D                                   | $Pna2_1$     | $1.2 \times 10^{-10}$ (10%)      | S26       |
| $[Fe_2[Nb(CN)_8](R-/S-pEtOH)_8 \cdot 6H_2O$          | 3D                                   | $I2_13$      | $1.1 \times 10^{-10}$<br>(9.2%)  | S27       |
| $[Dy(dma)_5][W(CN)_8]$                               | 1D                                   | $P2_1$       | $9.4 \times 10^{-11}$<br>(7.8%)  | S28       |
| $[Tb(dma)_5][W(CN)_8]$                               | 1D                                   | $P2_1$       | $8.9 \times 10^{-11}$<br>(7.4%)  | S28       |
| $Rb_{0.94}Mn[Fe(CN)_6]_{0.98} \cdot 0.2H_2O$         | 3D                                   | $F\bar{4}3m$ | $8 \times 10^{-11}$ (6.7%)       | S29       |
| $[Er(dma)_5][W(CN)_8]$                               | 1D                                   | $P2_1$       | $6.0 \times 10^{-11}$<br>(5.0%)  | S28,S30   |
| $[Mn(pz)(H_2O)_2][Mn(H_2O)_2][Mo(CN)_8] \cdot 4H_2O$ | 3D                                   | $P2_1$       | $6 \times 10^{-11}$ (5.0%)       | S31       |
| $[Y(dma)_5][W(CN)_8]$                                | 1D                                   | $P2_1$       | $4.9 \times 10^{-11}$<br>(4.1%)  | S28       |
| $[Ho(dma)_5][W(CN)_8]$                               | 1D                                   | $P2_1$       | $2.5 \times 10^{-11}$<br>(2.1%)  | S28       |



|                                                                                                                                   |    |        |                                  |     |
|-----------------------------------------------------------------------------------------------------------------------------------|----|--------|----------------------------------|-----|
| $[\text{Gd}(\text{dma})_5][\text{W}(\text{CN})_8]$                                                                                | 1D | $P2_1$ | $2.2 \times 10^{-11}$<br>(1.8%)  | S28 |
| $[\text{Mn}(\text{pz})(\text{H}_2\text{O})_2][\text{Mn}(\text{H}_2\text{O})_2][\text{Nb}(\text{CN})_8] \cdot 4\text{H}_2\text{O}$ | 3D | $P2_1$ | $2 \times 10^{-11}$ (1.7%)       | S32 |
| $[\text{Tm}(\text{dma})_5][\text{W}(\text{CN})_8]$                                                                                | 1D | $P2_1$ | $5.5 \times 10^{-12}$<br>(0.5%)  | S28 |
| $[\text{Yb}(\text{dma})_5][\text{W}(\text{CN})_8]$                                                                                | 1D | $P2_1$ | $4.9 \times 10^{-12}$<br>(0.4%)  | S28 |
| $[\text{Lu}(\text{dma})_5][\text{W}(\text{CN})_8]$                                                                                | 1D | $P2_1$ | $4.7 \times 10^{-12}$<br>(0.4%)  | S28 |
| $\{[\text{Nd}_4(\text{H}_2\text{O})_{17}(\text{pzdo})_5][\text{W}(\text{CN})_8]_3\} \cdot 9\text{H}_2\text{O}$                    | 2D | $C2$   | $2.6 \times 10^{-12}$<br>(0.22%) | S33 |
| $\{[\text{Nd}_4(\text{H}_2\text{O})_{17}(\text{pzdo})_5][\text{Mo}(\text{CN})_8]_3\} \cdot 9\text{H}_2\text{O}$                   | 2D | $C2$   | $1.3 \times 10^{-12}$<br>(0.11%) | S33 |

Ligands: dma = *N,N*-dimethylacetamide; dmf = *N,N*-dimethylformamide; pEtOH = 1-(3-pyridyl)ethanol; phen = 1,10-phenanthroline; pz = pyrazine; pzdo = pyrazine-*N,N'*-dioxide.

#### 4.7. Photoluminescence studies

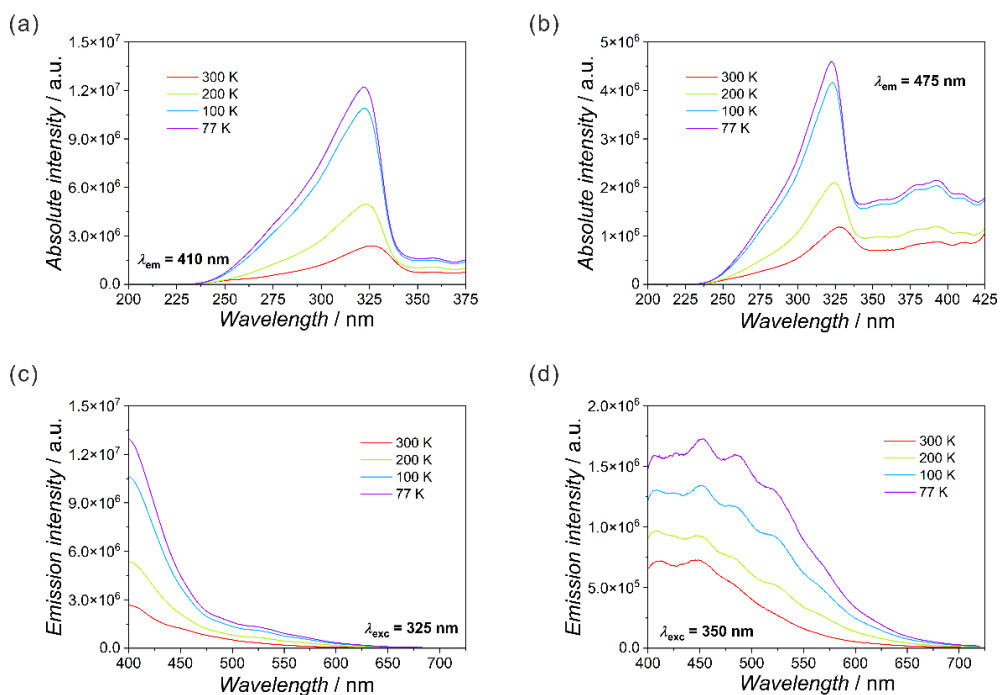

**Figure S34.** Photoluminescence spectra of DiR. Excitation spectra followed with the emission wavelength of 410 nm (a) and 475 nm (b). Emission spectra for the corresponding excitation wavelengths of 325 nm (c) and 350 nm (d).

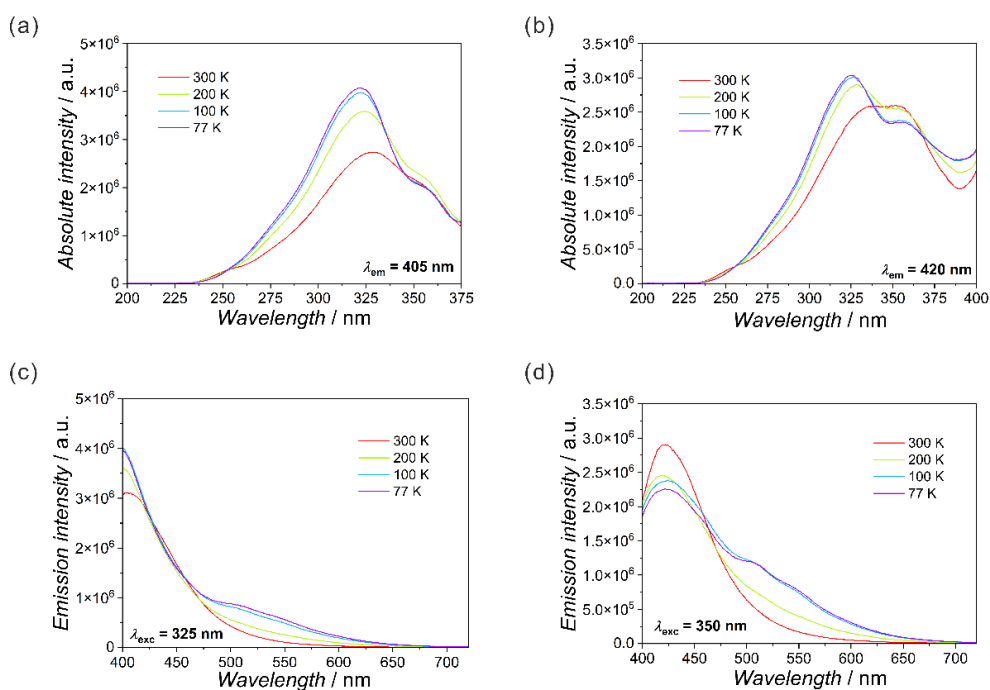

**Figure S35.** Photoluminescence spectra of TriRB. Excitation spectra followed with the emission wavelength of 405 nm (a) and 420 nm (b). Emission spectra for the corresponding excitation wavelengths of 325 nm (c) and 350 nm (d).

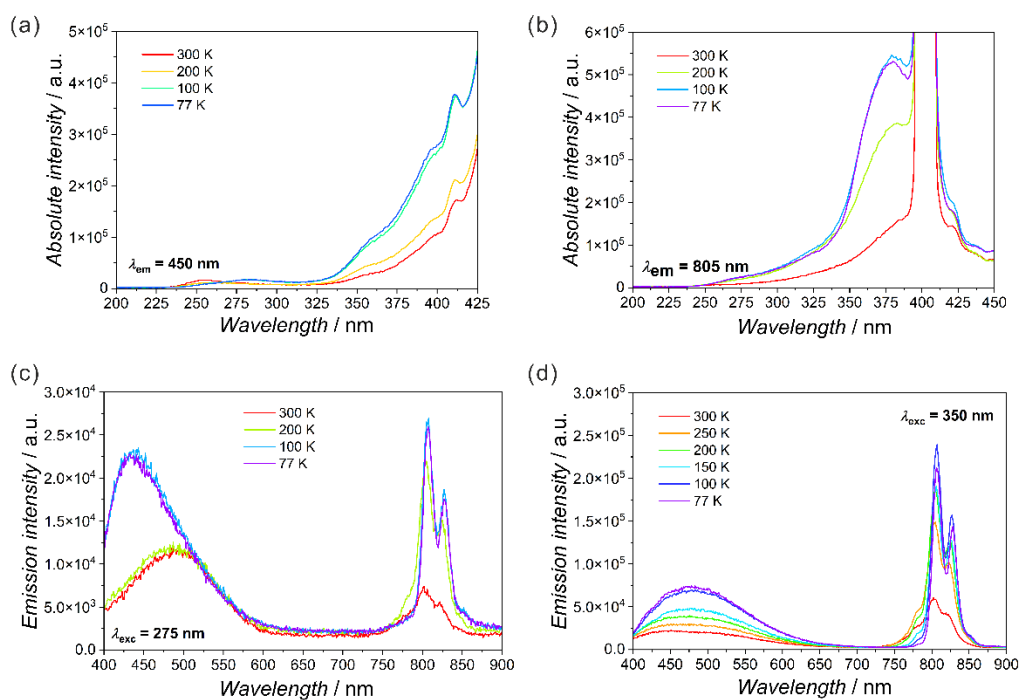

**Figure S36.** Photoluminescence spectra of **CrDiR**. Excitation spectra followed with emission wavelengths of 450 nm (a) and 805 nm (b). Emission spectra for the corresponding excitation wavelengths of 275 nm (c) and 350 nm (d).

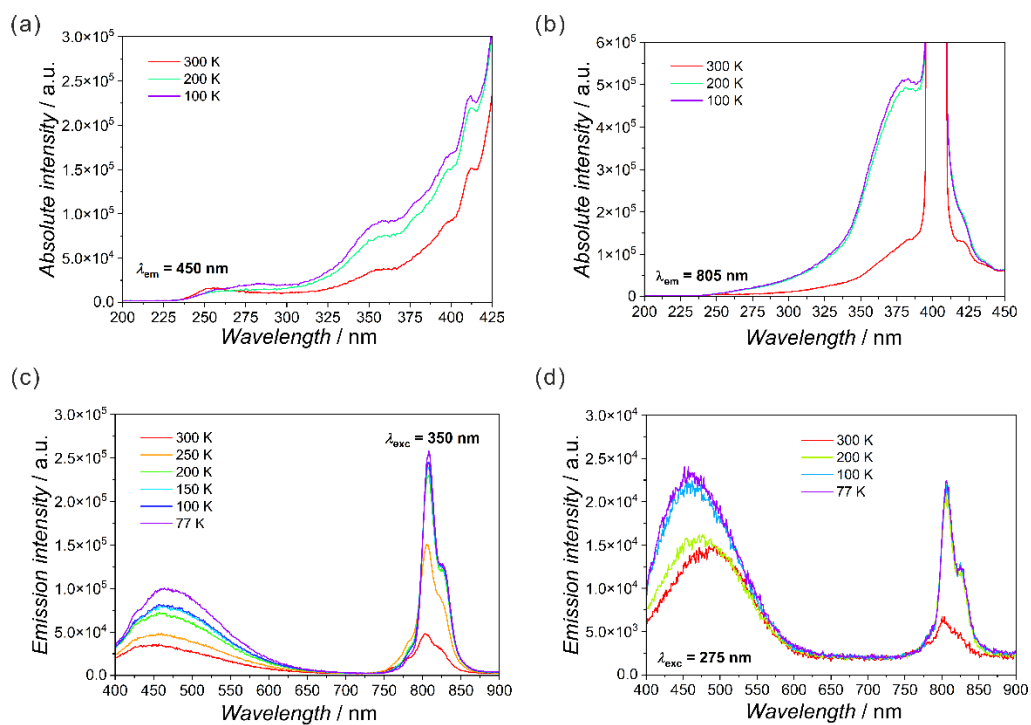

**Figure S37.** Photoluminescence spectra of **CrTriRB**. Excitation spectra followed with emission wavelengths of 450 nm (a) and 805 nm (b). Emission spectra for the corresponding excitation wavelengths of 350 nm (c) and 275 nm (d).

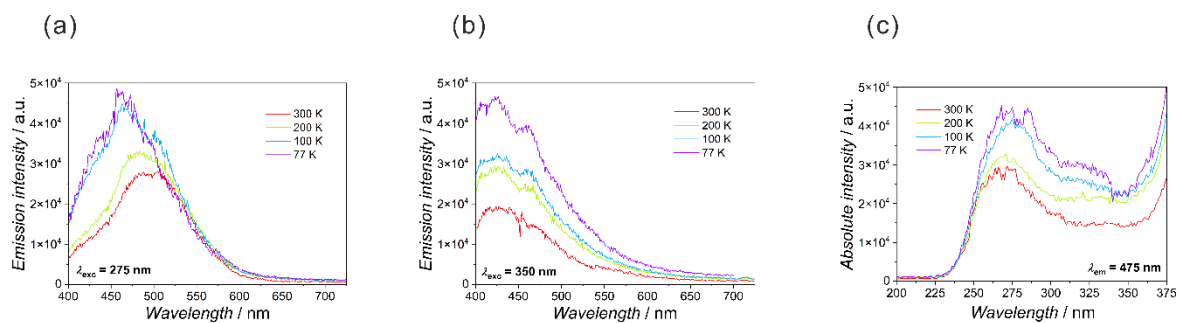

**Figure S38.** Photoluminescence spectra of **FeDiR**. Emission spectra for the corresponding excitation wavelengths of 275 nm (a) and 350 nm (b). Excitation spectra followed with emission wavelength of 475 nm (c).

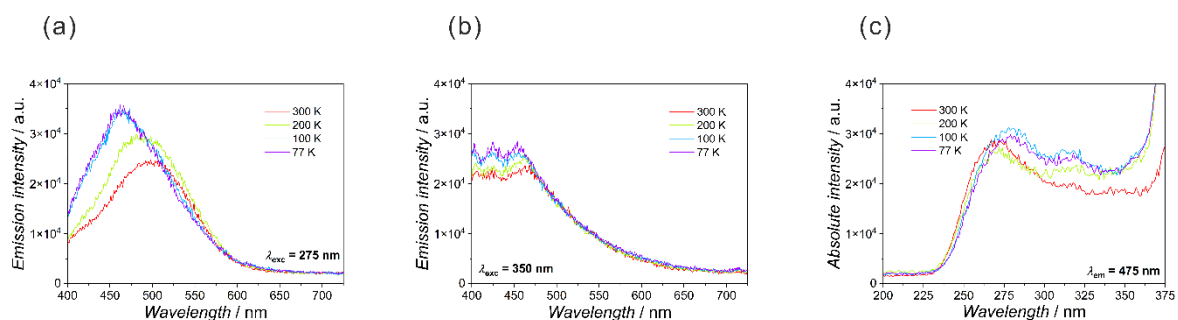

**Figure S39.** Photoluminescence spectra of **FeTriRB**. Emission spectra for the corresponding excitation wavelengths of 275 nm (a) and 350 nm (b). Excitation spectra followed with emission wavelength of 475 nm (c).

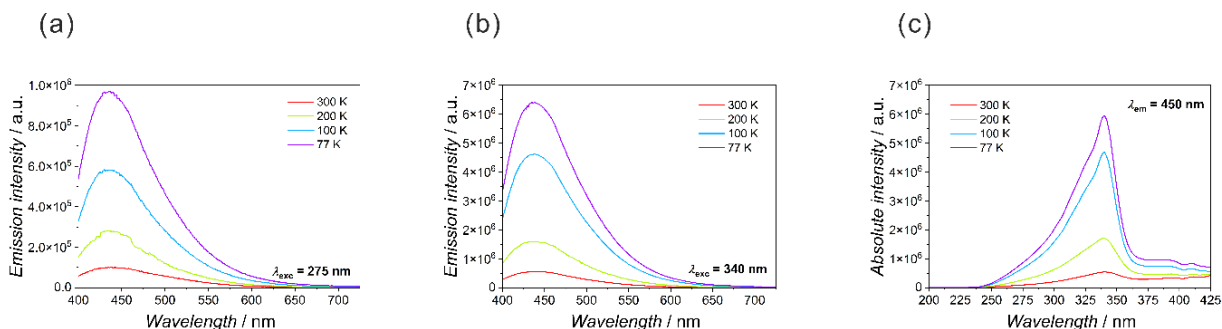

**Figure S40.** Photoluminescence spectra of **CoDiR**. Emission spectra for the corresponding excitation wavelengths of 275 nm (a) and 340 nm (b). Excitation spectra followed with emission wavelength of 450 nm (c).

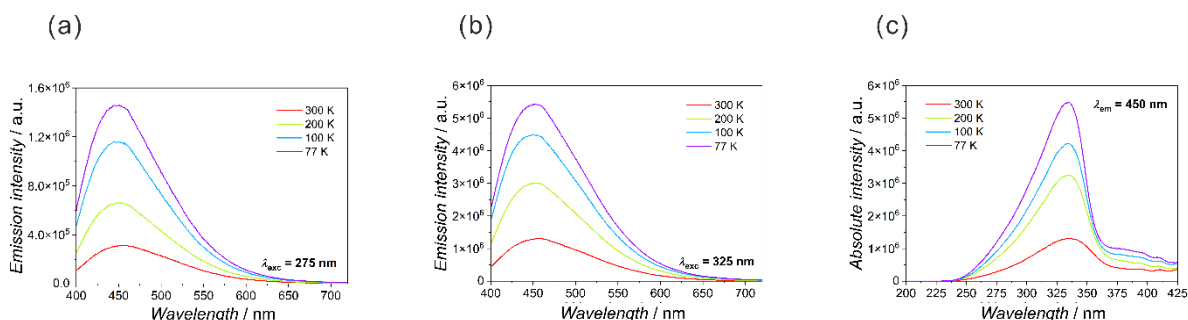

**Figure S41.** Photoluminescence spectra of **CoTriRB**. Emission spectra for the corresponding excitation wavelengths of 275 nm (a) and 325 nm (b). Excitation spectra followed with emission wavelength of 450 nm (c).

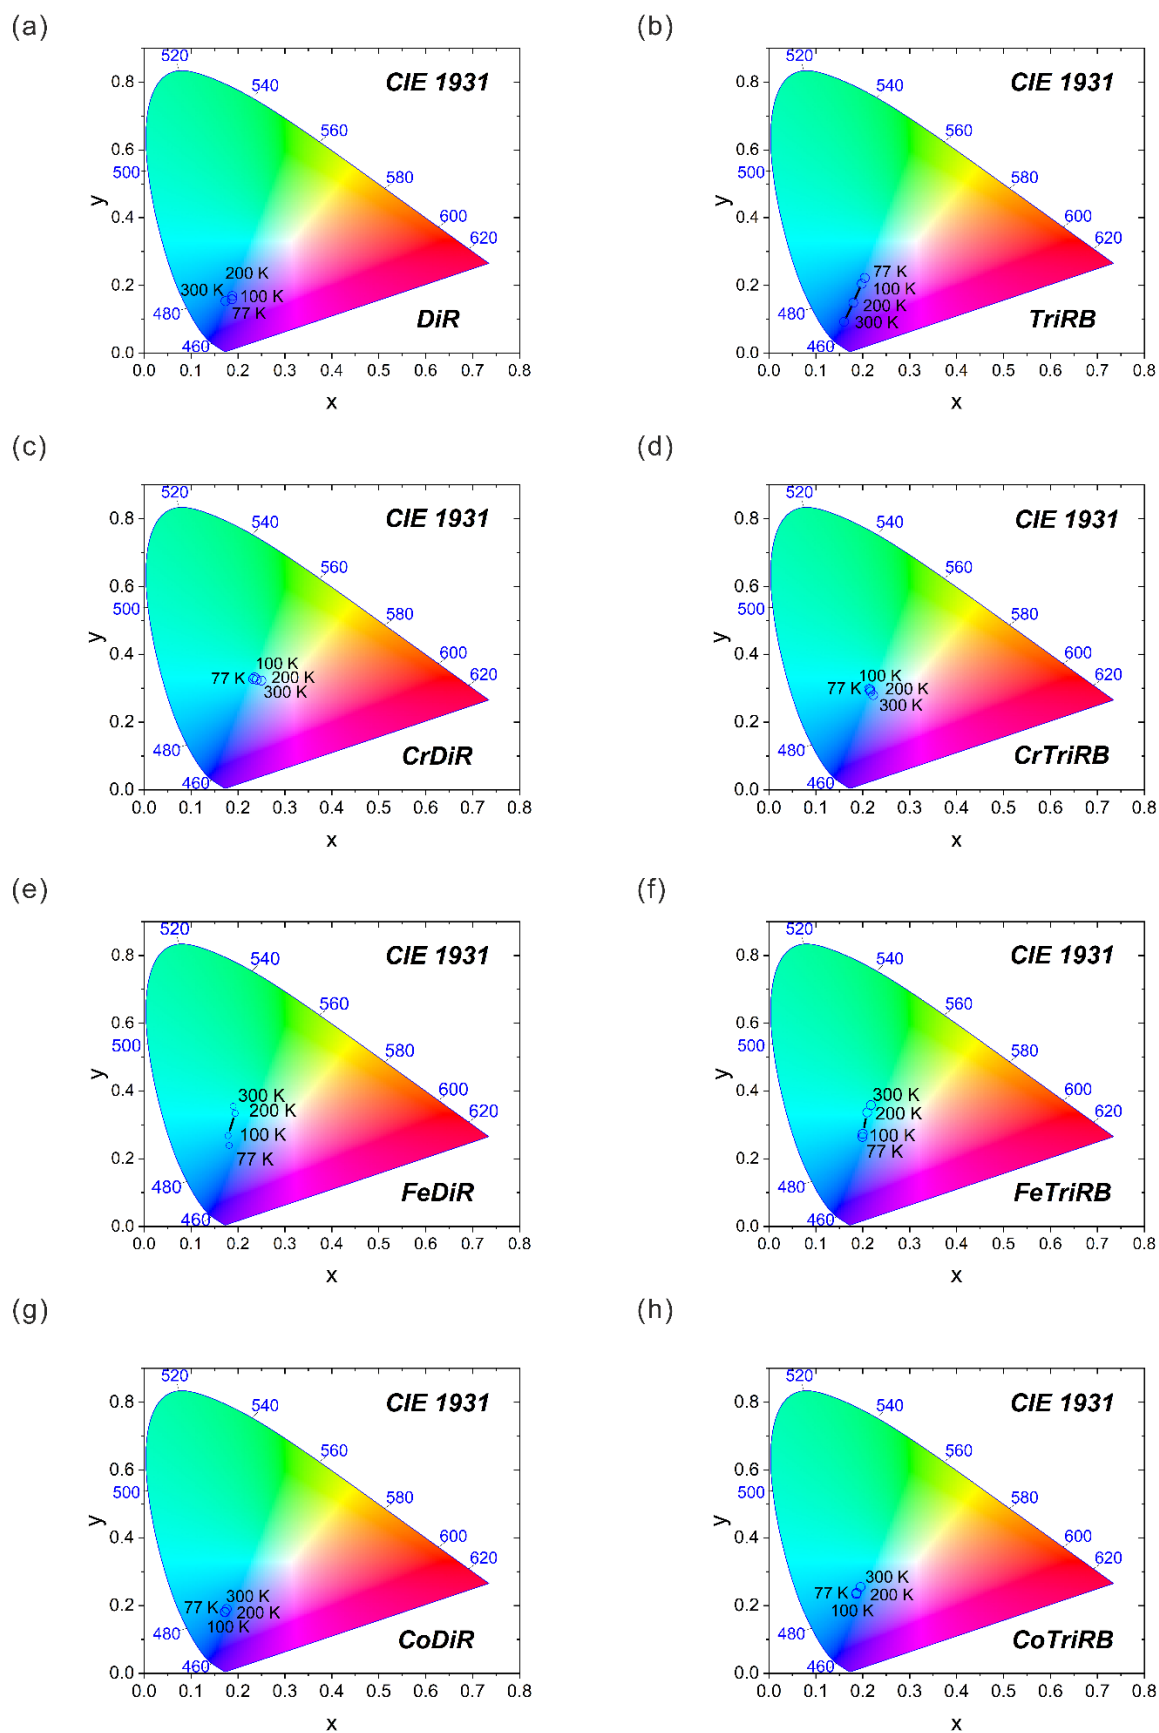

**Figure S42.** CIE1931 uniform chromaticity scale diagrams for DiR (a) and TriRB (b) ligands, CrDiR (c), CrTriRB (d), FeDiR (e), FeTriRB (f), CoDiR (g), and CoTriRB (h).

**Table S16.** Values of the measured quantum yield (QY) for **CrDiR**, **CrTriRB**, **CoDiR**, and **CoTriRB** together with the corresponding data for the cofomers DiR and TriRB as the references.

| Compound       | Quantum Yield,<br>QY | Excitation<br>Wavelength |
|----------------|----------------------|--------------------------|
| <b>CrDiR</b>   | 8.9%                 | 375 nm                   |
| <b>CrTriRB</b> | 2.4%                 | 375 nm                   |
| <b>CoDiR</b>   | 1.7%                 | 325 nm                   |
| <b>CoTriRB</b> | 1.3%                 | 325 nm                   |
| DiR            | 0.6%                 | 325 nm                   |
| TriRB          | 0.1%                 | 325 nm                   |

## 4.8. Details of materials and methods

### Materials and syntheses

#### *Synthetic procedures for precursors*

(PPh<sub>4</sub>)<sub>3</sub>[Fe(CN)<sub>6</sub>]·7H<sub>2</sub>O, (PPh<sub>4</sub>)<sub>3</sub>[Co(CN)<sub>6</sub>]·6H<sub>2</sub>O, and (PPh<sub>4</sub>)<sub>3</sub>[Cr(CN)<sub>6</sub>]·2H<sub>2</sub>O were prepared by metathesis of the corresponding potassium salts of the complexes with PPh<sub>4</sub>Cl. 3,3',5,5'-Tetramethoxy-1,19-biphenyl – DiR<sup>OMe</sup> and 5'-(3,5-dimethoxyphenyl)-3,3'',5,5''-tetramethoxy-1,19:3',1''-terphenyl – TriRB<sup>OMe</sup> were obtained using the Suzuki–Miyaura reaction, where the coupling partners were a boronic acid and an organohalide, and the catalyst was a palladium(0) complex. DiR<sup>OMe</sup> and TriRB<sup>OMe</sup> unlocking resulted in 3,3',5,5'-tetrahydroxy-1,19-biphenyl – DiR and 5'-(3,5-dihydroxyphenyl)-3,3'',5,5''-tetrahydroxy-1,19:3',1''-terphenyl – TriRB according to a modified literature procedure.<sup>S34</sup>

#### *General Synthetic Procedure for MDiR and MTriRB*

Acetonitrile solutions of (PPh<sub>4</sub>)<sub>3</sub>[M(CN)<sub>6</sub>]·nH<sub>2</sub>O (M = Cr(III), Fe(III), Co(III); n = 2, 6, 7) (0.026 g, ~ 0.019 – 0.021 mmol in 1 mL of MeCN) and DiR or TriRB (0.018 mmol in 1 mL of MeCN) were sonicated to obtain a clear solution; they were then combined, and the cream-colored solid was obtained, followed by dissolution in MeOH. The clear solution in a vial was exposed to diethyl ether vapors in a closed container. After 2 days, the crystals were filtered and washed with cold MeCN (10 mL, 2 °C) and dried in the air. The crystal structures of all compounds were determined based on single-crystal X-ray diffraction experiments. Fresh crystalline compounds were used for elemental analysis, infrared (IR), Raman, and UV-Vis absorption spectroscopies, SHG measurement, powder X-ray diffraction (PXRD), and thermogravimetric analyses.

#### *Synthesis of CrDiR - (PPh<sub>4</sub>)<sub>3</sub>[Cr(CN)<sub>6</sub>](DiR)<sub>2</sub>·2MeCN·MeOH*

Yield: 0.029 g, 80.0%. Elemental analysis: Calc. for C<sub>107</sub>H<sub>90</sub>CrN<sub>8</sub>O<sub>9</sub>P<sub>3</sub> (M<sub>w</sub> = 1776.77 g·mol<sup>-1</sup>): C, 72.33%; H, 5.11%; N, 7.18%. Found: C, 72.3%; H, 5.1%; N, 7.1%. IR (KBr, cm<sup>-1</sup>): 3410 – 2662 ν(O-H), 3082 ν(C-H), 2131 ν(C≡N) ([Cr(CN)<sub>6</sub>]<sup>3-</sup>), other: 1601, 1521, 1484, 1437, 1306, 1188, 1151, 1110, and 998 (vibrations of PPh<sub>4</sub><sup>+</sup>), 843, 755, and 724 (vibrations of DiR). Solubility: MeOH–good. Stability: composition is stable up to ca. 20 °C, the loss of 1 crystallization MeCN and 0.5 crystallization MeOH molecules occurs above room temperature; then, above 240 °C massive decomposition occurs (Figure S43).

#### *Synthesis of FeDiR - (PPh<sub>4</sub>)<sub>3</sub>[Fe(CN)<sub>6</sub>](DiR)<sub>2</sub>·3MeCN*

Yield: 0.029 g, 85.0%. Elemental analysis: Calc. for C<sub>108</sub>H<sub>89</sub>FeN<sub>9</sub>O<sub>8</sub>P<sub>3</sub> (M<sub>w</sub> = 1789.64 g·mol<sup>-1</sup>): C, 72.48%; H, 5.01%; N, 7.04%. Found: C, 72.3%; H, 4.9%; N, 7.1%. IR (KBr, cm<sup>-1</sup>): 3062 – 2661 ν(O-H)/ν(C-H), 2117 ν(C≡N) ([Fe(CN)<sub>6</sub>]<sup>3-</sup>), other: 1590, 1483, 1442, 1412, 1352, 1316, 1228, 12144, 1175, 1152, 1109, and 1007 (vibrations of PPh<sub>4</sub><sup>+</sup>), 843 and 756 (vibrations of DiR). Solubility: MeOH–good. Stability: composition is stable up to ca. 20 °C, the loss of 1.5 crystallization MeCN molecules occurs slowly above room temperature; then, above 230 °C massive decomposition occurs (Figure S43).

#### *Synthesis of CoDiR - (PPh<sub>4</sub>)<sub>3</sub>[Co(CN)<sub>6</sub>](DiR)<sub>2</sub>·MeCN·2MeOH*

Yield: 0.028 g, 85.0%. Elemental analysis: Calc. for C<sub>106</sub>H<sub>91</sub>CoN<sub>7</sub>O<sub>10</sub>P<sub>3</sub> (M<sub>w</sub> = 1774.69 g·mol<sup>-1</sup>): C, 71.74%; H, 5.17%; N, 5.52%. Found: C, 71.6%; H, 5.1%; N, 5.5%. IR (KBr, cm<sup>-1</sup>): 3092 – 2664 ν(O-H), 2132 and 2121

$\nu(\text{C}\equiv\text{N})$  ( $[\text{Co}(\text{CN})_6]^{3-}$ ), other: 1601, 1586, 1484, 1466, 1443, 1437, 1304, 1266, 1218, 1168, 1152, 1110, and 1004 (vibrations of  $\text{PPh}_4^+$ ), 840, 756, and 724 (vibrations of DiR). Solubility: MeOH. Stability: composition is stable up to ca. 60 °C, the loss of 1 crystallization MeCN and 2 crystallization MeOH molecules is observed in the range of 60–150 °C; then, above 290 °C massive decomposition occurs (Figure S43).

*Synthesis of CrTriRB -  $(\text{PPh}_4)_3[\text{Cr}(\text{CN})_6](\text{TriRB})\cdot\text{MeCN}\cdot\text{solv}$*

Yield: 0.019 g, 53.0%. Elemental analysis: Calc. for  $\text{C}_{107}\text{CrH}_{93}\text{N}_7\text{O}_9\text{P}_3$  ( $M_w = 1765.79 \text{ g}\cdot\text{mol}^{-1}$ ): C, 72.33%; H, 5.11%; N, 7.18%. Found: C, 72.3%; H, 5.1%; N, 7.1%. IR (KBr,  $\text{cm}^{-1}$ ): 3410 – 2662  $\nu(\text{O-H})$ , 3082  $\nu(\text{C-H})$ , 2131  $\nu(\text{C}\equiv\text{N})$  ( $[\text{Cr}(\text{CN})_6]^{3-}$ ), other: 1601, 1521, 1484, 1437, 1306, 1188, 1151, 1110, and 998 (vibrations of  $\text{PPh}_4^+$ ), 843, 755, and 724 (vibrations of TriRB). Solubility: MeOH. Stability: composition is stable up to ca. 40 °C, the loss of crystallization solvent molecules is observed in the range of 40–190 °C; then, above 230 °C massive decomposition occurs (Figure S43).

*Synthesis of FeTriRB -  $(\text{PPh}_4)_3[\text{Fe}(\text{CN})_6](\text{TriRB})\cdot 2\text{MeCN}\cdot\text{MeOH}$*

Yield: 0.016 g, 46.0%. Elemental analysis: Calc. for  $\text{C}_{107}\text{H}_{88}\text{FeN}_8\text{O}_7\text{P}_3$  ( $M_w = 1746.61 \text{ g}\cdot\text{mol}^{-1}$ ): C, 73.58%; H, 5.08%; N, 6.42%. Found: C, 73.5%; H, 5.0%; N, 6.4%. IR (KBr,  $\text{cm}^{-1}$ ): 3060 – 2662  $\nu(\text{O-H})/\nu(\text{C-H})$ , 2116  $\nu(\text{C}\equiv\text{N})$  ( $[\text{Fe}(\text{CN})_6]^{3-}$ ), other: 1590, 1483, 1442, 1352, 1316, 1174, 1151, 1109, 1007, and 996 (vibrations of  $\text{PPh}_4^+$ ), 842, 755, and 723 (vibrations of TriRB). Solubility: MeOH. Stability: composition is stable up to ca. 50 °C, the loss of 1 crystallization MeCN molecule occurs in the range of 50–150 °C; then, above 230 °C massive decomposition occurs (Figure S43).

*Synthesis of CoTriRB -  $2[(\text{PPh}_4)_3[\text{Co}(\text{CN})_6](\text{TriRB})]\cdot 4\text{MeCN}\cdot 1\text{MeOH}$*

Yield: 0.017 g, 52.0%. Elemental analysis: Calc. for  $\text{C}_{213}\text{H}_{172}\text{Co}_2\text{N}_{16}\text{O}_{13}\text{P}_6$  ( $M_w = 3467.34 \text{ g}\cdot\text{mol}^{-1}$ ): C, 73.78%; H, 5.00%; N, 6.46%. Found: C, 73.6%; H, 5.1%; N, 6.5%. IR (KBr,  $\text{cm}^{-1}$ ): 3061 – 2672  $\nu(\text{O-H})/\nu(\text{C-H})$ , 2138  $\nu(\text{C}\equiv\text{N})$  ( $[\text{Co}(\text{CN})_6]^{3-}$ ), other: 1588, 1484, 1437, 1341, 1164, 1109, 1009, and 997 (vibrations of  $\text{PPh}_4^+$ ), 847, 753, and 723 (vibrations of TriRB). Solubility: MeOH. Stability: composition is stable up to ca. 30 °C, the loss of 4 crystallization MeCN and 1 crystallization MeOH molecules is observed in the range of 30–100 °C; then, above 310 °C massive decomposition occurs (Figure S43).



#### 4.9. Thermogravimetric analysis

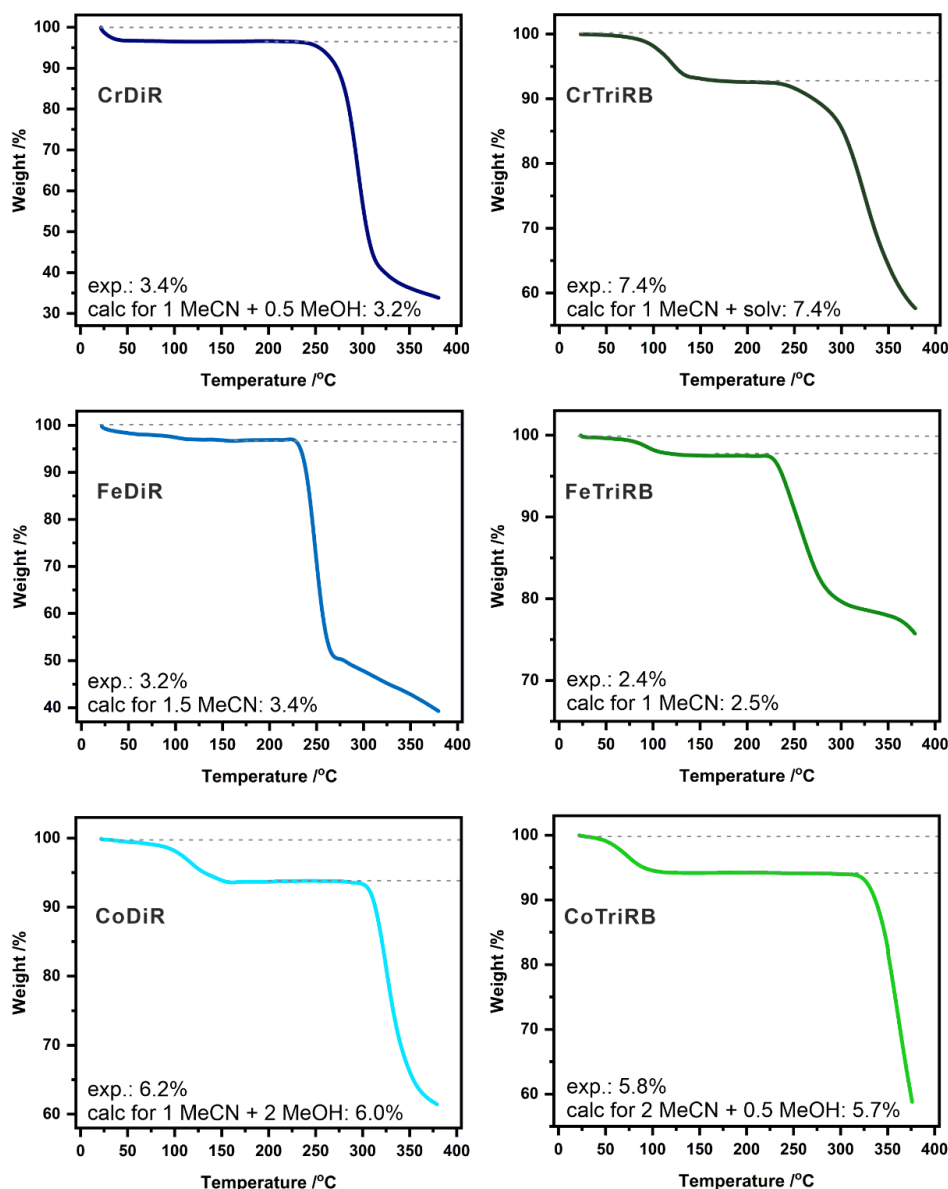

**Figure S43.** Thermogravimetric curves of **MDiR** and **MTriRB** collected under nitrogen atmosphere with a heating rate of 10 K per minute. The graphs show separate TG curves for each compound (**CrDiR**, **FeDiR**, **CoDiR**, **CrTriRB**, **FeTriRB**, and **CoTriRB**). Upon heating under nitrogen atmosphere, the powder samples are stable to  $T = 20^\circ\text{C}$  (**CrDiR**, **FeDiR**, **CrTriRB**),  $30^\circ\text{C}$  (**CoTriRB**), and  $50^\circ\text{C}$  (**CoDiR**, **FeTriRB**), then exhibit a small decrease in mass up to  $T = 140^\circ\text{C}$  (**CrDiR**, **FeTriRB**, **CoTriRB**),  $190^\circ\text{C}$  (**CrTriRB**),  $200^\circ\text{C}$  (**FeDiR**), and  $250^\circ\text{C}$  (**CoDiR**). These steps related to the loss of acetonitrile and methanol solvent molecules were depicted on the graphs, and they are accompanied by a comparison with the calculated values for the presented amount of solvent molecules per  $[\text{M}(\text{CN})_6]^{3-}$  units. The related decrease in the sample mass can also be correlated with the number of solvent molecules determined by CHN analyses (see synthetic procedures in the main text). Then, for the desolvated samples above  $T = 230^\circ\text{C}$  (**FeDiR**, **CrTriRB**, **FeTriRB**),  $240^\circ\text{C}$  (**CrDiR**),  $290^\circ\text{C}$  (**CoDiR**), and  $310^\circ\text{C}$  (**CoTriRB**) massive decomposition occurs.

### X-ray diffraction analysis.

Diffraction data for all the compounds were collected using a Bruker D8 Quest Eco diffractometer equipped with a Photon II detector and a Mo K $\alpha$  ( $\lambda = 0.71073 \text{ \AA}$ ) radiation source with a graphite monochromator and Oxford Cryostream cooling system. Crystals for measurement were taken from the mother solution and covered by NVH immersion oil. All measurements were performed at 100 K. Data reduction and cell parameter refinement were carried out using the Apex software, which included the SAINT and SADABS programs. The intensities of reflections for the sample absorption were corrected using the multiscan method. Structures were solved by the intrinsic phasing method and refined anisotropically with weighted full-matrix least-squares on F<sup>2</sup> using the SHELXTS<sup>35</sup> and SHELXLS<sup>36</sup> programs with the Olex 2 graphic interface.<sup>337</sup> Heavy atoms were refined with anisotropic displacement parameters, whereas hydrogen atoms were assigned at calculated positions with thermal displacement parameters fixed to a value of 20% or 50% higher than those of the corresponding carbon atoms. All structural figures were prepared using the Mercury software.<sup>338</sup> The results of the data collection and refinement have been summarized in Tables S1 and S2, and selected bond lengths and angles are presented in Tables S3 and S4 in the SI. CCDC **CrDiR** – 2271018, **FeDiR** – 2271019, **CoDiR** – 2271020, **CrTriRB** – 2271021, **FeTriRB** – 2271022, and **CoTriRB** – 2271023 contain the supplementary crystallographic data for all the compounds, respectively. These data can be obtained free of charge from the Cambridge Crystallographic Data Centre [www.ccdc.cam.ac.uk/data\\_request/cif](http://www.ccdc.cam.ac.uk/data_request/cif). The topology of hydrogen-bonded subnetworks was analyzed using the TOPOS Pro software.<sup>339</sup>

### Physical techniques and computational methods.

Elemental analyses of CHNS were performed using the Elemental Vario Micro Cube CHNS analyzer. Powder X-ray diffraction patterns for **MDiR**, and **MTriRB** in 0.7 mm glass capillaries were collected on a D8 Advance Eco (Bruker) using a Cu-K $\alpha$  radiation source. Thermogravimetric (TGA) curves for the polycrystalline samples were collected using a TG209 F1 Libra thermogravimetric analyzer with aluminum pans as holders. The data were collected in the temperature range of 21–400 °C under a nitrogen atmosphere with a heating rate of 10 °C per minute. Infrared (IR) absorption spectra in the range of 4000–675 cm<sup>-1</sup> were measured on the selected single-crystals using a Nicolet iN10 MX Fourier transform infrared microscope. Diffuse reflectance spectra measurements in the UV-Vis-NIR range were performed for the freshly ground powder samples mixed with BaSO<sub>4</sub> (2 mass %) using a Shimadzu UV-3600i Plus spectrophotometer equipped with the 50 mm integrating sphere. The spectra were recalculated according to the Kubelka–Munk equation. Luminescence spectra in the reflectance mode were measured with the Horiba Jobin-Yvon Fluorolog<sup>®</sup>-3 (FL3-211) spectrofluorometer (model TKN-7), equipped with a 450 W Xe-lamp and the R928P detector working in the photon counting mode, for the samples dispersed in paraffin oil and blocked between two quartz plates placed inside the liquid nitrogen-cooled MicrostatHe (Oxford Instruments) connected to the digital temperature controller MercuryiTC (a sweeping rate of 2 K min<sup>-1</sup>). Room-temperature Raman scattering spectra in the range of 4000–100 cm<sup>-1</sup> for the single crystals were accumulated using a JASCO NRS-7500 laser Raman spectrometer (532.12 nm laser with 0.8 mW power, single monochromator, L600/B500 nm grating, d-100  $\mu$ m slit, d-4000  $\mu$ m aperture, MPLFLN 20x objective lens, BS 30/70, and 5%(OD1.3) attenuator). A room-temperature absolute photoluminescence quantum yield detection device (C9920-02, Hamamatsu Photonics) with an integrating sphere with a 3.3-inch radius was used to measure emission quantum yields. The excitation source, a Xenon lamp, produced different excitation wavelengths ranging from 250 to 950 nm with the use of a monochromator. A PMA multichannel spectrometer was used to detect the emitted light in

the reflection mode after normal excitation light exposure through the side of the sphere. To prevent seeing the sample's fluorescence and scattered light directly, a baffle was put in between the sample and the detecting port. An empty quartz vessel was inserted into the sphere prior to each measurement to serve as an excitation reference spectrum. The quantum yield of the sample was then determined by dividing the number of photons absorbed by the sample by the number of photons released as photoluminescence. For the same substance, several independent measurements were made to confirm its reproducibility. In SHG measurements, fundamental 1040 nm light, generated by the femtosecond pulsed laser (Spectra Physics Spirit One), has been applied. Green light transmitted through an IR filter, a third harmonic generation filter, and a band-pass filter was observed with a photomultiplier tube (Hamamatsu R329-02). The Mössbauer spectra of **FeDiR** and **FeTriRB** were recorded in a routine transmission geometry at room temperature, using WissEl spectrometer (Wissenschaftliche Electronic GmbH, Ortenberg, Germany). The powder samples were directly placed into copper rings and sealed with Kapton foil. The spectra were collected in 1024 channels, with a ~5 mCi  $^{57}\text{Co}$  source in an Rh matrix. The temperature stabilization was up to 0.5 K. The velocity scale was calibrated using the  $\alpha$ -Fe foil standard. The reported spectra were numerically evaluated with the use of the *WinNormos-for-Igor package* (Wissenschaftliche Electronic GmbH, Ortenberg, Germany).

## References to Supplementary Information

- (S1) Loos, M.; Gerber C.; Corona, F.; Hollander, J.; Singer H. Accelerated Isotope Fine Structure Calculation Using Pruned Transition Trees. *Anal. Chem.* **2015**, *87*, 5738–5744.
- (S2) Jędrzejowska, K.; Kobylarczyk, J.; Glosz, D.; Kuzniak-Glanowska, E.; Tabor, D.; Srebro-Hooper, M.; Zakrzewski, J. J.; Dziedzic-Kocurek, K.; Muzioł, T. M.; Podgajny R. Supramolecular cis-“Bis(Chelation)” of  $[\text{M}(\text{CN})_6]^{3-}$  (M = Cr<sup>III</sup>, Fe<sup>III</sup>, Co<sup>III</sup>) by Phloroglucinol ( $\text{H}_3\text{PG}$ ). *Molecules* **2022**, *27*, 4111.
- (S3) te Velde, G.; Bickelhaupt, F. M.; Baerends, E. J.; Fonseca Guerra, C.; van Gisbergen, S. J. A.; Snijders, J. G.; Ziegler, T. Chemistry with ADF. *J Comput Chem* **2001**, *22*, 931–967.
- (S4) ADF 2019.304, SCM, Theoretical Chemistry, Vrije Universiteit, Amsterdam, The Netherlands, <http://www.scm.com>.
- (S5) Caldeweyher, E.; Ehlert, S.; Hansen, A.; Neugebauer, H.; Spicher, S.; Bannwarth, C.; Grimme, S. A Generally Applicable Atomic-Charge Dependent London Dispersion Correction. *J. Chem. Phys.* **2019**, *150*, 154122.
- (S6) Becke, A. D. Density – Functional Thermochemistry. III. The Role of Exact Exchange. *J. Chem. Phys.* **1993**, *98*, 5648–5652.
- (S7) Lee, C.; Yang, W.; Parr, R. G. Development of the Colle-Salvetti Correlation-Energy Formula into a Functional of the Electron Density. *Phys. Rev. B* **1988**, *37*, 785–789.
- (S8) Stephens, P. J.; Devlin, F. J.; Chabalowski, C. F.; Frisch, M. J. Ab Initio Calculation of Vibrational Absorption and Circular Dichroism Spectra Using Density Functional Force Fields. *J. Phys. Chem.* **1994**, *98*, 11623–11627.
- (S9) Becke, A. D. Density-Functional Exchange-Energy Approximation with Correct Asymptotic Behavior. *Phys. Rev. A* **1988**, *38*, 3098–3100.
- (S10) van Lenthe, E.; Baerends, E. J.; Snijders, J. G. Relativistic Regular Two-Component Hamiltonians. *J. Chem. Phys.* **1993**, *99*, 4597–4610.

- (S11) van Lenthe, E.; Baerends, E. J.; Snijders, J. G. Relativistic Total Energy Using Regular Approximations. *J. Chem. Phys.* **1994**, *101*, 9783–9792.
- (S12) Gaussian 16, Revision C.01, Frisch, M. J.; Trucks, G. W.; Schlegel, H. B.; Scuseria, G. E.; Robb, M. A.; Cheeseman, J. R.; Scalmani, G.; Barone, V.; Petersson, G. A.; Nakatsuji, H.; Li, X.; Caricato, M.; Marenich, A. V.; Bloino, J.; Janesko, B. G.; Gomperts, R.; Mennucci, B.; Hratchian, H. P.; Ortiz, J. V.; Izmaylov, A. F.; Sonnenberg, J. L.; Williams-Young, D.; Ding, F.; Lipparini, F.; Egidi, F.; Goings, J.; Peng, B.; Petrone, A.; Henderson, T.; Ranasinghe, D.; Zakrzewski, V. G.; Gao, J.; Rega, N.; Zheng, G.; Liang, W.; Hada, M.; Ehara, M.; Toyota, K.; Fukuda, R.; Hasegawa, J.; Ishida, M.; Nakajima, T.; Honda, Y.; Kitao, O.; Nakai, H.; Vreven, T.; Throssell, K.; Montgomery, J. A., Jr.; Peralta, J. E.; Ogliaro, F.; Bearpark, M. J.; Heyd, J. J.; Brothers, E. N.; Kudin, K. N.; Staroverov, V. N.; Keith, T. A.; Kobayashi, R.; Normand, J.; Raghavachari, K.; Rendell, A. P.; Burant, J. C.; Iyengar, S. S.; Tomasi, J.; Cossi, M.; Millam, J. M.; Klene, M.; Adamo, C.; Cammi, R.; Ochterski, J. W.; Martin, R. L.; Morokuma, K.; Farkas, O.; Foresman, J. B.; Fox, D. J. Gaussian, Inc., Wallingford CT, 2016.
- (S13) Grimme, S.; Antony, J.; Ehrlich, S.; Krieg, H. A consistent and accurate ab initio parametrization of density functional dispersion correction (DFT-D) for the 94 elements H-Pu. *J. Chem. Phys.* **2010**, *132*, 154104.
- (S14) Grimme, S.; Ehrlich, S.; Goerigk, L. Effect of the Damping Function in Dispersion Corrected Density Functional Theory. *J. Comput. Chem.* **2011**, *32*, 1456–1465.
- (S15) Weigend, F.; Ahlrichs, R. Balanced basis sets of split valence, triple zeta valence and quadruple zeta valence quality for H to Rn: Design and assessment of accuracy. *Phys. Chem. Chem. Phys.* **2005**, *7*, 3297–3305.
- (S16) Schaefer, A.; Huber, C.; Ahlrichs, R. Fully optimized contracted Gaussian basis sets of triple zeta valence quality for atoms Li to Kr. *J. Chem. Phys.* **1994**, *100*, 5829–5835.
- (S17) Mitoraj, M.; Michalak, A. Natural Orbitals for Chemical Valence as Descriptors of Chemical Bonding in Transition Metal Complexes. *J. Mol. Model.* **2007**, *13*, 347–355.
- (S18) Mitoraj, M. P.; Michalak, A.; Ziegler, T. A Combined Charge and Energy Decomposition Scheme for Bond Analysis. *J. Chem. Theory Comput.* **2009**, *5*, 962–975.
- (S19) Erdogdu, Y.; Başköse, Ü. C.; Sağlam, S. Conformational, Structural, Electronic, and Vibrational Investigations on 5-Methyl-4-(2-Thiazolylazo)Resorcinol by FT-IR, FT-Raman, NMR, and DFT. *Chem. Pap.* **2019**, *73*, 1879–1891.
- (S20) Druzbicki, K.; Mikuli, E.; Pałka, N.; Zalewski, S.; Ossowska-Chruściel, M. D. Polymorphism of Resorcinol Explored by Complementary Vibrational Spectroscopy (FT-RS, THz-TDS, INS) and First-Principles Solid-State Computations (Plane-Wave DFT). *J. Phys. Chem. B* **2015**, *119*, 1681–1695.
- (S21) Perdew, J. P.; Burke, K.; Ernzerhof, M. Generalized gradient approximation made simple. *Phys. Rev. Lett.* **1996**, *77*, 3865–3868.
- (S22) GaussView, Version 6.1.1, Dennington, R.; Keith, T. A.; Millam, J. M. Semichem Inc., Shawnee Mission, KS, **2016**.
- (S23) Chemla, D. S.; Zyss, J. Nonlinear optical properties of organic molecules and crystals; Academic Press: London, **1987**.
- (S24) Komine, M.; Imoto, K.; Namai, A.; Yoshikiyo, M.; Ohkoshi, S. Photoswitchable Nonlinear-Optical Crystal Based on a Dysprosium–Iron Nitrosyl Metal Assembly. *Inorg. Chem.* **2021**, *60*, 2097–2104.
- (S25) Hozumi, T.; Nuida, T.; Hashimoto, K.; Ohkoshi, S. Crystal Structure and Nonlinear Optical Effect of a Pyroelectric Crystal Composed of a Cyano-Bridged Cu–Mo Assembly. *Cryst. Growth Des.* **2006**, *6*, 1736–1737.

- (S26) Komine, M.; Chorazy, S.; Imoto, K.; Nakabayashi, K.; Ohkoshi, S. SHG-active  $\text{Ln}^{\text{III}}\text{--}[\text{Mo}^{\text{I}}(\text{CN})_5(\text{NO})]^{3-}$  (Ln = Gd, Eu) magnetic coordination chains: a new route towards non-centrosymmetric molecule-based magnets. *CrystEngComm* **2017**, *19*, 18–22.
- (S27) Kawabata, S.; Nakabayashi, K.; Imoto, K.; Klimke, S.; Renz, F.; Ohkoshi, S. Second Harmonic Generation on Chiral Cyanido-Bridged  $\text{Fe}^{\text{II}}\text{--Nb}^{\text{IV}}$  Spin-Crossover Complexes. *Dalton Trans.* **2021**, *50*, 8524–8532.
- (S28) Kumar, K.; Stefanczyk, O.; Chilton, N. F.; Nakabayashi, K.; Imoto, K.; Winpenny, R. E. P.; Ohkoshi, S. Magnetic Properties and Second Harmonic Generation of Noncentrosymmetric Cyanido-Bridged  $\text{Ln}(\text{III})\text{--W}(\text{V})$  Assemblies. *Inorg. Chem.* **2021**, *60*, 12009–12019.
- (S29) Ohkoshi, S.; Saito, S.; Matsuda, T.; Nuida, T.; Tokoro, H. Continuous change of second-order nonlinear optical activity in a cyano-bridged coordination polymer. *J. Phys. Chem. C* **2008**, *112*, 13095–13098.
- (S30) Kumar, K.; Stefańczyk, O.; Nakabayashi, K.; Imoto, K.; Ohkoshi, S. Studies of  $\text{Er}(\text{III})\text{--W}(\text{V})$  compounds showing nonlinear optical activity and single-molecule magnetic properties. *CrystEngComm* **2019**, *21*, 5882–5889.
- (S31) Kosaka, W.; Nuida, T.; Hashimoto, K.; Ohkoshi, S. Crystal Structure, Magnetic Properties, and Second Harmonic Generation of a Three-Dimensional Pyroelectric Cyano-Bridged  $\text{Mn--Mo}$  Complex. *Bull. Chem. Soc. Jpn.* **2007**, *80*, 960–962.
- (S32) Tsunobuchi, Y.; Kosaka, W.; Nuida, T.; Ohkoshi, S. Magnetization-induced second harmonic generation in a three-dimensional manganese octacyanonitobate-based pyroelectric ferrimagnet. *CrystEngComm* **2009**, *11*, 2051–2053.
- (S33) Jankowski, R.; Zakrzewski, J. J.; Zychowicz, M.; Wang, J.; Oki, Y.; Ohkoshi, S.; Chorazy S.; Sieklucka, B. SHG-active NIR-emissive molecular nanomagnets generated in layered neodymium(III)–octacyanidometallate(IV) frameworks. *J. Mater. Chem. C* **2021**, *9*, 10705–10717.
- (S34) Chaumont, C.; Mobian, P.; Kyritsakas, N.; Henry, M. Synthesis, Topology and Energy Analysis of Crystalline Resorcinol-Based Oligophenylene Molecules with Various Symmetries. *CrystEngComm* **2013**, *15*, 6854–6862.
- (S35) Sheldrick, G. M. A Short History of *SHELX*. *Acta Crystallogr. A* **2008**, *64*, 112–122.
- (S36) Sheldrick, G. M. Crystal Structure Refinement with *SHELXL*. *Acta Crystallogr. C Struct. Chem.* **2015**, *71*, 3–8.
- (S37) Dolomanov, O. V.; Bourhis, L. J.; Gildea, R. J.; Howard, J. A. K.; Puschmann, H. *OLEX2*: A Complete Structure Solution, Refinement and Analysis Program. *J. Appl. Crystallogr.* **2009**, *42*, 339–341.
- (S38) Macrae, C. F.; Sovago, I.; Cottrell, S. J.; Galek, P. T. A.; McCabe, P.; Pidcock, E.; Platings, M.; Shields, G. P.; Stevens, J. S.; Towler, M.; Wood, P. A. *Mercury 4.0*: From Visualization to Analysis, Design and Prediction. *J. Appl. Crystallogr.* **2020**, *53*, 226–235.
- (S39) Blatov, V. A.; Shevchenko, A. P.; Proserpio, D. M. Applied Topological Analysis of Crystal Structures with the Program Package ToposPro. *Cryst. Growth Des.* **2014**, *14*, 3576–3586.
